1 **Clinical features of bloodstream infections caused by the two dominant clones of**  
2 **endemic methicillin-resistant *Staphylococcus aureus***

3 Amy C. Dupper, MPH, MA<sup>1</sup>, Mitchell J. Sullivan, PhD<sup>2</sup>, Kieran I. Chacko, BA, BS<sup>2</sup>,  
4 Aaron Mishkin, MD<sup>1</sup>, Brianne Ciferri, MPH<sup>2</sup>, Ajay Kumaresh, PhD<sup>2</sup>, Ana Berbel Caban,  
5 MD<sup>1</sup>, Irina Oussenko, PhD<sup>2</sup>, Colleen Beckford, MS<sup>2</sup>, Nathalie E. Zeitouni, PhD<sup>2</sup>, Robert  
6 Sebra, PhD<sup>2</sup>, Camille Hamula, PhD<sup>3</sup>, Melissa Smith, PhD<sup>2</sup>, Andrew Kasarskis, PhD<sup>2</sup>,  
7 Gopi Patel, MD, MS<sup>1</sup>, Russell B. McBride, PhD, MPH<sup>3</sup>, Harm van Bakel, PhD<sup>2</sup>, and  
8 Deena R. Altman, MD, MS<sup>1,2</sup>

9 <sup>1</sup>Department of Medicine, Division of Infectious Diseases, Icahn School of Medicine at  
10 Mount Sinai, New York City, USA

11 <sup>2</sup>Department of Genetics and Genomic Sciences, Icahn School of Medicine at Mount  
12 Sinai, New York City, USA

13 <sup>3</sup>Department of Pathology, Icahn School of Medicine at Mount Sinai, New York City,  
14 USA

15

16 **Keywords:** Methicillin-resistant *Staphylococcus aureus*, peripheral intravenous  
17 catheters, bloodstream infections, molecular epidemiology

18

19 Address correspondence to:

20 Deena Altman, MD

21 1 Gustave L. Levy Place, Box 1090

22 New York, NY 10029

23 Email: [deena.altman@mssm.edu](mailto:deena.altman@mssm.edu)

24 Tel: 212-241-2229

25 Previous presentation of data:

26 The results of this study were presented in part at as a poster at the *International*  
27 *Symposium on Staphylococci and Staphylococcal Infections* (ISSSI) held in  
28 Copenhagen, Denmark, in August 2018.

29 Abbreviated title: Clinical and clonal features of invasive *S. aureus*

30 *Abstract*

31 **Background:** We evaluated the molecular epidemiology of methicillin-resistant *S.*  
32 *aureus* (MRSA) bloodstream infections (BSIs) through an in-depth analysis of BSIs  
33 caused by the two dominant clones circulating in New York City at a large urban  
34 tertiary- and quaternary-care teaching hospital.

35 **Methods:** Comprehensive clinical data extraction from the electronic health records of  
36 227 hospitalized patients  $\geq 18$  years old with MRSA bacteremia between August 2014  
37 through April 2017 was collected. The descriptive epidemiology and mortality  
38 associated with the two dominant clonal complexes (CCs) was compared using logistic  
39 regression.

40 **Results:** Analysis revealed that 91% of all single-patient MRSA BSIs were due to two  
41 equally represented genotypes, the CC5 (N=117) and the CC8 (N=110). The CC8  
42 caused disease more frequently in younger age groups ( $60 \pm 17$  vs  $70 \pm 17$  years old;  
43  $p < 0.001$ ) and in non-White race (OR=3.21 95% CI [1.42-7.22];  $p = 0.005$ ). The CC8  
44 caused BSI more frequently in the setting of peripheral intravenous catheters infections  
45 (OR=6.46; 95% CI [1.68-24.87];  $p = 0.007$ ). MRSA BSIs were associated with 90-day  
46 mortality of 27%.

47 **Conclusions:** The clinical features distinguishing the two dominant MRSA clones  
48 continue to converge. The association of CC8 with peripheral intravenous catheters  
49 infections underscores the importance of classical community clones causing hospital-  
50 onset infections. Ongoing monitoring and analysis of the dynamic epidemiology of this  
51 endemic pathogen is crucial to inform management to prevent invasive disease.

## 52 *Introduction*

53 Healthcare-associated infections (HAIs) pose a potentially fatal threat to patients  
54 worldwide<sup>1</sup> and *Staphylococcus aureus* is one of the most common causes of HAIs in  
55 the United States.<sup>2,3</sup> Methicillin-resistant *S. aureus* (MRSA) bloodstream infections  
56 (BSIs) are linked with mortality up to 30% and are associated with longer hospital stays  
57 and increased healthcare costs.<sup>4,5</sup> MRSA has long been present in healthcare settings  
58 but is now well established in the community.<sup>6</sup> The two dominant MRSA clones in the  
59 United States are the clonal complex (CC) 5 and CC8.<sup>3</sup> Historically, the CC5 has been  
60 associated with older individuals with hospital or long-term care facility contact.<sup>6</sup> In  
61 contrast, the CC8, predominantly the USA300 pulsotype, was first reported in the US in  
62 healthy children in 1990s and raised concern for its capacity to cause severe disease in  
63 healthy individuals.<sup>7</sup> Over the following two decades, the CC8, driven by the USA300,  
64 would become established as the predominant community-associated clone, presenting  
65 as skin and soft tissue infections (SSTIs) in athletes, children in day-care centers,  
66 injection drug users, and in persons with human immunodeficiency virus (HIV)  
67 infection.<sup>8,9</sup> Between 2004 and 2008, the reported prevalence of the CC8 doubled in  
68 healthcare settings and was associated with as many inpatient infections as the CC5.<sup>6,9</sup>

69 We sought to update and expand on the descriptive molecular epidemiology of  
70 MRSA BSIs in a major academic medical center in New York City. We examined the  
71 differences between the two dominant clonal complexes, CC5 and CC8, and their  
72 associated clinical and epidemiological features. We additionally studied clonal  
73 associations in the context of current surveillance definitions as defined by the National  
74 Healthcare Safety Network (NHSN), which are reportable.<sup>10</sup> We explored clones in the

75 context of associations with inpatient and outpatient community healthcare networks.  
76 Finally, we examined subgroups within the two clones with an interest in the clinical  
77 features of the USA500, a relatively understudied clone.<sup>11,12</sup> With extensive clinical  
78 detail we describe a more complex picture than current definitions are able to describe.

## 79 *Methods*

### 80 Patient Selection

81 The Mount Sinai Hospital (MSH) is a 1,018-bed tertiary- and quaternary-care  
82 facility. Under the approval of the MSH institutional review board, data were captured  
83 on a total of 250 adult ( $\geq 18$  years old) patients with MRSA BSI by the MSH Clinical  
84 Microbiology Laboratory as part of standard clinical care between August 2014 and April  
85 2017. Identification and susceptibility of MRSA was performed using VITEK<sup>®</sup>2  
86 (bioMerieux). From a larger hospital-wide genomic surveillance program, we derived the  
87 CC and multilocus sequence typing (MLST) *in silico* using the RESTful interface to the  
88 *S. aureus* PubMLST<sup>13</sup> database. Staphylococcal protein A (*spa*) and Panton-Valentine  
89 Leukocidin (PVL) were generated using a custom script  
90 ([https://github.com/mjsull/spa\\_typing](https://github.com/mjsull/spa_typing)) and BLAST+<sup>14</sup> respectively. Core-genome MLST  
91 types were determined using the schema available at  
92 (<https://www.cgmlst.org/ncs/schema/141106/>), and a tree for the visualization of clusters  
93 was created using GrapeTree<sup>15</sup>.

94 Demographic and clinical data was obtained retrospectively from the electronic  
95 medical record system, including geographic admission data, presumed source of the  
96 BSI based on Infectious Diseases (ID) consultant, comorbidities, and prior outpatient  
97 healthcare exposures. For a description of key variables see Supplementary Table 1. All

98 patients diagnosed with MRSA BSI received a consultation from an ID specialist at the  
99 time of diagnosis as per standard practice at our institution. The online database  
100 REDCap<sup>16</sup> was used for data capture and to calculate the Charlson Comorbidity Index  
101 (CCI).<sup>17</sup> Patients with non-CC5 or CC8 MRSA were excluded, resulting in a total of 227  
102 patients for analyses. Zip codes were used to create a map of clones using the  
103 geographic information system (GIS) software ESRI Spatial Analysis.<sup>18</sup> Surveillance  
104 definitions included hospital-onset MRSA (HO-MRSA), defined as positive cultures on  
105 or after the fourth day after hospital admission, and community-onset MRSA (CO-  
106 MRSA) defined as BSI presenting within the 72-hour hospital admission interval.<sup>10</sup>

### 107 Statistical Analysis

108 We selected established clinical correlates related to prior epidemiological  
109 studies, including demographics, baseline comorbidities, admission sources, and  
110 infection sources. We also evaluated in-hospital outcomes and death, especially those  
111 related to the MRSA BSI. We collapsed variables to make the final set of covariates  
112 informative and reflective of current published literature. Analyses were performed in  
113 SAS (ver.9.4),<sup>19</sup> and survival curves were produced using R (ver.3.4.2).<sup>20</sup> Non-normally  
114 distributed continuous variables were categorized into discrete categorical groups.  
115 Variables were first analyzed in a univariate logistic regression model, with variables  
116  $p \leq 0.2$  then placed into a multivariate logistic regression model. Mortality analyses were  
117 analyzed using a Cox regression model. All variables with  $p \leq 0.05$  were considered  
118 statistically significant.

### 119 *Results*

#### 120 Molecular composition of clones involved in MRSA BSI

121 Molecular analysis of single-patient, first episode MRSA BSI revealed the  
122 majority of MRSA BSIs were caused by two dominant clones, the CC5 and CC8  
123 (Supplementary Figure 1, Supplementary Table 2, Supplementary Excel Table 1). The  
124 CC8 was the cause of BSI in 110 (44%), and the CC5 in 117 (47%) of the total of 250  
125 cases, representing 91% of the entire population. Only 23 (9%) were non- CC5/CC8.  
126 Within the CC5, the majority were either sequence type (ST) 5 (N=49; 42%) or ST105  
127 (N=61; 52%). Six percent (N=7) belonged to other STs within the CC5. The majority of  
128 isolates within the CC8 were ST8 (N=108; 98%) with 2 (2%) additional non-ST8 clones.  
129 The majority (N=64; 58%) of ST8 were *spa* type t008, along with 20 (18%) non-t008 *spa*  
130 types which also clustered with USA300. Additionally, the CC8 included 24 (22%) *spa*  
131 type t064, including three (3%) non-t064 *spa* types, all clustering in the USA500  
132 lineage.<sup>11,21</sup>

### 133 Baseline Clinical Characteristics of patients with MRSA BSIs

134 Sixty-seven percent of patients were male, and the median age at diagnosis was  
135 66 years old (Table 1). The racial and ethnic composition included non-Hispanic White  
136 (N=98; 43%), non-Hispanic Black (N=63; 28%), Hispanic/Latino (N=46; 20%), Asian  
137 (N=8; 4%), and not reported (N=12; 5%). MRSA BSIs were linked to a wide range of  
138 causes, with vascular access (N=78; 34%), pneumonia (N=24; 11%), and SSTIs (N=26;  
139 11%) representing the most common causes.

140 We performed a comprehensive analysis of admission sources. More than half of  
141 patients were admitted from home (N=128; 56%) with the remaining patients transferred  
142 in from nursing homes/rehabilitation/long-term care facilities (NH/Rehab/LTACH) (N=60;  
143 26%), outside hospitals (N=35; 15%), or homeless shelters (N=4; 2%). Of subjects

144 residing at home or group home settings, 32% (N=56) had frequent contact with  
145 healthcare centers either via outpatient dialysis (N=22; 12%) or infusion centers (N=34;  
146 19%). Only 27 (12%) study patients had no significant inpatient or outpatient healthcare  
147 exposure.

148 The mean CCI of subjects on hospital admission was 5.7. The most common  
149 comorbid medical conditions in our dataset were congestive heart failure (N=54; 24%)  
150 and chronic renal disease (N=55; 24%). Ten percent (N=22) of patients were co-  
151 infected with HIV. Additionally, 32 (14%) had a history of a transplant (solid organ or  
152 bone marrow). Injection drug use was reported by 10% (N=23) of our population, and  
153 41% (N=94) had a prior history of MRSA colonization.

#### 154 Clinical features and geographic distribution of the two dominant MRSA clones

155 As the CC5 and CC8 were responsible for the majority of BSIs, we anchored our  
156 analyses on comparing these two clones. The majority of variables examined were not  
157 significantly increased in one clone over the other, with several notable exceptions.  
158 Race was found to confound the effects of HIV and injection drug use, so these two  
159 variables were retained in the final model. Logistic regression revealed that non-  
160 Hispanic Black race (OR=3.09; 95% CI [1.38-6.91];  $p=0.006$ ), Hispanic/Latino race  
161 (OR=2.87 95% CI [1.22-6.76];  $p=0.02$ ), and HIV (OR=3.60 95% CI [1.02-12.75];  $p=0.05$ )  
162 had a higher likelihood of being infected with the CC8. Alternately, patients were less  
163 likely to have BSI with the CC8 if they were greater than 70 years (OR=0.30 95% CI  
164 [0.14-0.67];  $p=0.003$ ) or if admitted from an outside hospital (OR=0.35 95% CI [0.12-  
165 1.00];  $p=0.05$ ) vs. home. Interestingly, the CC8 was increased in patients with peripheral



166 intravenous catheters (PIVs) as the presumed source of MRSA BSI compared to the  
167 CC5 (OR=6.46 95% CI [1.68-24.87];  $p=0.007$ ) (Table 2).

168 On multivariate analysis, there were equal proportions of the CC8 vs CC5 across  
169 patient admission sources. We mapped the clones according to patient zip code and  
170 found no significant clustering aside from the area surrounding the hospital (Figure 1).

#### 171 Clinical characteristics of patients with MRSA BSI from clonal subgroups

172 Although we performed our top level analysis at the CC level, we additionally  
173 wanted to evaluate for potential clinical differences between the larger subgroups within  
174 the CC clones. We found 27 CC8 isolates clustering with the USA500, which is  
175 considered healthcare-associated MRSA.<sup>11,12,21</sup> We thus compared the USA500 to the  
176 USA300 and found higher rates of USA500 in those with HIV (OR=4.91 95% CI [1.00-  
177 24.36];  $p=0.05$ ) (Supplementary Table 3). We also compared subgroups ST105 and  
178 ST5 within the CC5, which revealed few notable distinctions (Supplementary Table 4).  
179 Stepwise removal of any of these subgroups did not impact results of our top level CC8  
180 vs. CC5 analyses, thus they were retained in all analyses.

#### 181 Addressing surveillance definitions in endemic settings

182 We sought to add clinical detail to the BSIs in relation to NHSN definitions of CO-  
183 MRSA and HO-MRSA BSI.<sup>10</sup> The majority of BSIs were classified as CO-MRSA  
184 (N=132; 58%) vs. HO-MRSA (N=95; 42%). Logistic regression (Table 3) revealed that  
185 patients characterized as CO-MRSA were more likely to have the CC8 (OR=2.30 95%  
186 CI [1.22-3.58];  $p=0.03$ ), and more likely to be receiving hemodialysis (OR=5.58 95% CI  
187 [1.71-18.21];  $p=0.004$ ). Conversely, CO-MRSA was less likely to be associated with

188 prior invasive procedures (OR=0.20 95% CI [0.09-0.43];  $p<0.001$ ), MRSA BSI from a  
189 PIV (OR=0.12 95% CI [0.03-0.44];  $p=0.002$ ), MRSA BSI from vascular access  
190 (OR=0.38 95% CI [0.15-0.98];  $p=0.05$ ), and intensive care unit (ICU) admission prior to  
191 BSI (OR=0.12 95% CI [0.04-0.37];  $p<0.001$ ). Only 27 (12%) patients had no clear  
192 healthcare exposure, thus 88% of our total patient population had healthcare risk factors  
193 prior to their MRSA BSI.

194 We next examined CC8 vs CC5 stratified by NHSN definitions. The CC8 was  
195 responsible for 38% of HO-MRSA BSIs and was associated with younger age and non-  
196 Hispanic Black race (Supplementary Table 5 & 6). Among patients grouped into the HO-  
197 MRSA stratum, those whose MRSA BSI resulting from a PIV (OR=9.84 95% CI [1.46-  
198 66.50];  $p=0.02$ ) were more likely to be from the CC8. We also explored the  
199 comorbidities that constitute the CCI, and we found that those with lymphoma and/or  
200 multiple myeloma had an increase in HO-MRSA (OR=0.29 95% CI [0.11-0.78];  $p=0.01$ ),  
201 and were more likely to have the CC5 in the HO-MRSA (OR=0.06 95% CI [0.01-0.54];  
202  $p=0.01$ ) (Supplementary Table 7C & D).

### 203 Differences in morbidity and mortality related to MRSA BSIs

204 We investigated morbidity outcomes associated with MRSA BSI, such as ICU  
205 admission, need for mechanical ventilation, and development of metastatic  
206 complications. Overall, we found no differences in morbidity between the two clones  
207 (Supplementary Table 8). Interestingly, strictly CO-MRSA had overall worse hospital  
208 outcomes, with increased ICU admissions (OR=10.73 95% CI [3.94-29.26];  $p<0.001$ ),  
209 mechanical ventilation (OR=3.45 95% CI [1.30-9.15];  $p=0.01$ ), and metastatic  
210 complications (OR=2.08 95% CI [1.03-4.21];  $p=0.04$ ) associated with MRSA BSI

211 (Supplementary Table 8B). Overall, 20% (N=46) had persistent bacteremia (defined as  
212 BSI lasting >7 days) with no clonal predominance in these cases.

213 With regard to mortality, we examined 90-day all-cause and 90-day mortality  
214 associated with MRSA BSI. All-cause 90-day mortality was 27% (N=61) and of those  
215 that died at 90-days, death was associated with the MRSA BSI in 54% (N=33) of cases.  
216 All-cause 90-day mortality had a lower likelihood of death due to CC8 vs. CC5  
217 (OR=0.55 95% CI [0.360-1.00];  $p=0.05$ ), which was also observed in the CO-MRSA  
218 stratum (OR=0.43 95% CI [0.19-0.99];  $p=0.05$ ).

219 As a correlate for pathogenesis, we examined whether one clone had higher 90-  
220 day mortality in the setting of MRSA BSI. We first looked solely at the survival curves of  
221 each clone (Figure 2), which revealed no difference. Second, we examined the clone  
222 variable in a multivariate Cox regression with possible confounders (Figure 3).  
223 Interestingly, there was no difference in MRSA-related 90-day mortality related to MRSA  
224 with respect to clones (OR=0.91 95% CI [0.45-1.85];  $p=0.79$ ). Ninety-day mortality  
225 related to MRSA was more likely to occur in individuals older than 70 years (OR=4.48  
226 95% CI [1.71-11.73];  $p=0.002$ ) and those with metastatic solid tumors (OR=3.79 95% CI  
227 [1.25-11.51];  $p=0.02$ ). Finally, we examined 90-day mortality associated with MRSA BSI  
228 due to primary sources of bacteremia (Supplementary Figure 2), which revealed higher  
229 mortality with MRSA BSI from pneumonia (OR=2.93 95% CI [0.98-8.74];  $p=0.05$ ) or  
230 septic arthritis (OR=5.80 95% CI [1.05-32.13];  $p=0.04$ ).

### 231 *Discussion*

232 As clones causing invasive MRSA infections are tied to specific populations,  
233 syndromes and settings, and are thought to behave differently, we sought to unravel

234 how these associations manifest clinically in BSIs in a high level care institution in an  
235 endemic region. This study represents a large cohort of patients who were selected  
236 based strictly on presence of invasive disease (bacteremia) and demonstrate highly  
237 complex cases linked to significant morbidity and mortality. Consistent with previous  
238 reports from our region<sup>22</sup> and across the United States,<sup>3</sup> the majority of isolates were  
239 either CC5 or CC8. Our analyses demonstrate that the CC8, representing half of all  
240 MRSA BSIs, was more frequently seen in younger age and non-White race. These data  
241 support the described convergence of clinical features classically associated with the  
242 two dominant clones.<sup>6,23</sup> Although stratification by surveillance definitions was  
243 consistent with clones to an extent, overall it questions the applicability of definitions in  
244 endemic regions. These findings provide support for the concept that classic community  
245 genotypes involve individuals with frequent healthcare interactions.<sup>24</sup>

246 Although CC8/USA300 is considered “hypervirulent”, causing disease in  
247 younger, healthier individuals,<sup>23,25,26</sup> work performed in animal models does not always  
248 actualize in complex human infections.<sup>27,28</sup> Our study did not find significant differences  
249 in mortality and other outcomes based on MRSA clone, even after adjusting for  
250 comorbidities. Patients in our study had a high CCI of 5.7, with most other studies in the  
251 1.5-3 range.<sup>17,23</sup> We found increased mortality in the setting of MRSA BSI among those  
252 older than 70 years and those with metastatic solid tumors. Although these underlying  
253 conditions are independently associated with an increased risk for death, these data  
254 suggest that these populations have worse outcomes over other types of comorbid  
255 conditions when they develop MRSA BSI, and could be a focus in future interventions.

256 Finally, there was a higher proportion of males in our study, consistent with prior  
257 studies.<sup>29,30</sup>

258 Of interest was the increase in BSIs due to the USA500 in persons with HIV  
259 (PWH), a finding only described in several recent conference proceedings.<sup>31,32</sup> This  
260 suggests that the types of MRSA infecting PWH may be shifting away from the historical  
261 USA300.<sup>6</sup> As the USA500 is considered a healthcare clone,<sup>6,11,12</sup> this may reflect the  
262 changing epidemiology and management of HIV as it becomes a more chronic  
263 condition.<sup>33</sup>

264 We also describe an increase in CC8 in PIV-related BSIs, which was additionally  
265 evident in the HO-MRSA stratum. Source determination was based on the  
266 documentation of thrombophlebitis in all cases, as described in detail by ID consultants.  
267 We did not include PIV infection unless it was clearly stated by ID clinicians to be the  
268 actual source, and ensured these infections were not incorrectly categorized as other  
269 types of skin infections. PIV placement is an aseptic but not a sterile procedure, and  
270 more emphasis and attention is placed on maintenance of central venous catheters  
271 than on PIVs. Although the incidence of PIV-related BSIs is low, the high frequency of  
272 PIV use results in a significant portion of PIVs resulting in BSIs.<sup>34</sup> BSIs derive from  
273 colonizing flora,<sup>35</sup> and the CC8 (USA300 in particular) is associated with skin  
274 colonization. One possible explanation for our finding is that patients are colonized with  
275 the CC8 and subsequently become infected with their colonizing isolate after PIV-  
276 related complications.<sup>36</sup> This work further builds upon community origins of HO-MRSA  
277 BSIs by adding the association of CC8 with PIVs among patients with HO-MRSA.<sup>37</sup> A  
278 larger sample size and access to colonizing isolates would assist in expansion of this

279 concept, highlight under-recognized HAIs,<sup>29,38</sup> and assist in evaluating the role of patient  
280 hygiene.

281 This study also examined the challenges of current surveillance definitions to  
282 describe these infections. A striking 88% of all patients had previous healthcare  
283 exposures, and 80% of the strictly CO-MRSA had healthcare exposures. An alternative  
284 definition of community-onset healthcare-associated (CO-HCA) for BSIs that present  
285 within three days of hospital admission in patients with frequent healthcare exposure<sup>4,25</sup>  
286 may be more appropriate to report. We also describe that those presenting with BSIs  
287 from the community are also a medically complex group with poor outcomes, findings  
288 consistent with studies associating CO-MRSA with complicated bacteremia.<sup>39</sup>  
289 Furthermore, those infected with the CO-MRSA with CC5 were well advanced in their  
290 disease course, either through delay of presentation to the hospital or through transfers  
291 from other facilities for advanced care (as noted that 52 (39%) of admissions in the CO-  
292 MRSA group were admitted from other facilities). It appears that future descriptions of  
293 these classifications should include the changing epidemiology of the patients and their  
294 complex medical experiences.

295 This study has several limitations. As a retrospective study, it is subject to errors  
296 in chart abstraction. Being a single institution study, findings from the medically complex  
297 population studied may not be generalizable to smaller community hospitals. Our  
298 primary endpoint of mortality may be subject to reporting bias since death occurring  
299 outside the hospital may not have been captured in medical records. Although we  
300 recognize that methicillin-susceptible *S. aureus* (MSSA) also causes significant disease,

301 we focused on MRSA-BSI due to the focus of our molecular surveillance program.<sup>40</sup>

302 Similar analyses extending beyond BSIs and including MSSA are critical.

303 In a highly complex patient population, there remain few distinct differences in  
304 the characteristics between the two endemic clones. The CC8 has become even more  
305 common in the hospital, and it behaves similarly to the CC5 by infecting infirm  
306 individuals. Our study also highlights shifts in molecular epidemiology, at-risk  
307 populations, and potential preventative focus areas such as PIVs in order to forestall  
308 this fatal disease process. Integration of these clinical correlates with other multiscale  
309 analyses will lead to a more complete understanding *S. aureus* pathogenesis.

310 *Acknowledgements*

311 *Financial support.* This research was supported in part by the CTSA/NCATS KL2  
312 Program (KL2TR001435, Icahn School of Medicine at Mount Sinai), the New York State  
313 Department of Health Empire Clinical Research Investigator Program (Aberg, Icahn  
314 School of Medicine and Mount Sinai) (DRA), and R01 AI119145 (HvB). The funders  
315 had no role in study design, data collection and interpretation, or the decision to submit  
316 the work for publication.

317 *Potential conflicts of interest.* All authors report no conflicts of interest relevant to this  
318 article.



## References

1. Kallen AJ, Mu Y, Bulens S, et al. Health care-associated invasive MRSA infections, 2005-2008. *JAMA*. 2010;304(6):641-648.
2. Lowy FD. Staphylococcus aureus infections. *N Engl J Med*. 1998;339(8):520-532.
3. Chambers HF, Deleo FR. Waves of resistance: Staphylococcus aureus in the antibiotic era. *Nat Rev Microbiol*. 2009;7(9):629-641.
4. Klevens RM, Morrison MA, Nadle J, et al. Invasive methicillin-resistant Staphylococcus aureus infections in the United States. *JAMA*. 2007;298(15):1763-1771.
5. McHugh CG, Riley LW. Risk factors and costs associated with methicillin-resistant Staphylococcus aureus bloodstream infections. *Infect Control Hosp Epidemiol*. 2004;25(5):425-430.
6. Seybold U, Kourbatova EV. Emergence of community-associated methicillin-resistant Staphylococcus aureus USA300 genotype as a major cause of health care—associated blood stream .... *Clin Infect Dis*. 2006.
7. Centers for Disease Control and Prevention (CDC). Four pediatric deaths from community-acquired methicillin-resistant Staphylococcus aureus — Minnesota and North Dakota, 1997-1999. *MMWR Morb Mortal Wkly Rep*. 1999;48(32):707-710.
8. Fridkin SK, Hageman JC, Morrison M, et al. Methicillin-resistant Staphylococcus aureus disease in three communities. *N Engl J Med*. 2005;352(14):1436-1444.

9. Rhee Y, Aroutcheva A, Hota B, Weinstein RA, Popovich KJ. Evolving Epidemiology of *Staphylococcus aureus* Bacteremia. *Infect Control Hosp Epidemiol*. 2015;36(12):1417-1422.
10. Center for Disease Control and Prevention. Multidrug-Resistant Organism & *Clostridioides difficile* Infection (MDRO/CDI) Module. 2018.
11. Frisch MB, Castillo-Ramírez S, Petit RA 3rd, et al. Invasive Methicillin-Resistant *Staphylococcus aureus* USA500 Strains from the U.S. Emerging Infections Program Constitute Three Geographically Distinct Lineages. *mSphere*. 2018;3(3).
12. Benson MA, Ohneck EA, Ryan C, et al. Evolution of hypervirulence by a MRSA clone through acquisition of a transposable element. *Mol Microbiol*. 2014;93(4):664-681.
13. Jolley KA, Maiden MCJ. BIGSdb: Scalable analysis of bacterial genome variation at the population level. *BMC Bioinformatics*. 2010;11:595.
14. Camacho C, Coulouris G, Avagyan V, et al. BLAST+: architecture and applications. *BMC Bioinformatics*. 2009;10:421.
15. Zhou Z, Alikhan N-F, Sergeant MJ, et al. GrapeTree: visualization of core genomic relationships among 100,000 bacterial pathogens. *Genome Res*. 2018;28(9):1395-1404.
16. Harris PA, Taylor R, Thielke R, Payne J, Gonzalez N, Conde JG. Research electronic data capture (REDCap)--a metadata-driven methodology and workflow

- process for providing translational research informatics support. *J Biomed Inform.* 2009;42(2):377-381.
17. McGregor JC, Kim PW, Perencevich EN, et al. Utility of the Chronic Disease Score and Charlson Comorbidity Index as comorbidity measures for use in epidemiologic studies of antibiotic-resistant organisms. *Am J Epidemiol.* 2005;161(5):483-493.
  18. ESRI (2011) ArcGIS Desktop Release 10. Environmental Systems Research Institute, Redlands. - References - Scientific Research Publishing.
  19. SAS Institute. *Base SAS 9.4 Procedures Guide: Statistical Procedures, Second Edition.*; 2013.
  20. Gentleman R, Ihaka R, Bates D, Chambers J, Dalgaard J, Hornik K. The R project for statistical computing. URL: [http://www r-project org/254](http://www.r-project.org/254). 2009.
  21. Boyle-Vavra S, Li X, Alam MT, et al. USA300 and USA500 clonal lineages of *Staphylococcus aureus* do not produce a capsular polysaccharide due to conserved mutations in the *cap5* locus. *MBio.* 2015;6(2).
  22. Roberts RB, de Lencastre A, Eisner W, et al. Molecular epidemiology of methicillin-resistant *Staphylococcus aureus* in 12 New York hospitals. *J Infect Dis.* 1998;178(1):164-171.
  23. Popovich KJ, Weinstein RA, Hota B. Are community-associated methicillin-resistant *Staphylococcus aureus* (MRSA) strains replacing traditional nosocomial MRSA strains? *Clin Infect Dis.* 2008;46(6):787-794.

24. Johnson LB, Bhan A, Pawlak J, Manzor O, Saravolatz LD. Changing epidemiology of community-onset methicillin-resistant *Staphylococcus aureus* bacteremia. *Infect Control Hosp Epidemiol.* 2003;24(6):431-435.
25. Kempker RR, Farley MM, Ladson JL, Satola S, Ray SM. Association of methicillin-resistant *Staphylococcus aureus* (MRSA) USA300 genotype with mortality in MRSA bacteremia. *J Infect.* 2010;61(5):372-381.
26. Thurlow LR, Joshi GS, Richardson AR. Virulence strategies of the dominant USA300 lineage of community-associated methicillin-resistant *Staphylococcus aureus* (CA-MRSA). *FEMS Immunol Med Microbiol.* 2012;65(1):5-22.
27. Recker M, Laabei M, Toleman MS, et al. Clonal differences in *Staphylococcus aureus* bacteraemia-associated mortality. *Nat Microbiol.* 2017;2(10):1381-1388.
28. Rose HR, Holzman RS, Altman DR, et al. Cytotoxic Virulence Predicts Mortality in Nosocomial Pneumonia Due to Methicillin-Resistant *Staphylococcus aureus*. *J Infect Dis.* 2015;211(12):1862-1874.
29. Blauw M, Foxman B, Wu J, Rey J, Kothari N, Malani AN. Risk factors and outcomes associated with hospital-onset peripheral intravenous catheter-associated *Staphylococcus aureus* bacteremia. *Open Forum Infect Dis.* February 2019.
30. Humphreys H, Fitzpatrick F, Harvey BJ. Gender differences in rates of carriage and bloodstream infection caused by methicillin-resistant *Staphylococcus aureus*: are they real, do they matter and why? *Clin Infect Dis.* 2015;61(11):1708-1714.

31. Popovich KJ, Snitkin ES, Green SJ, et al. 1247. Genomic Epidemiology of MRSA DURING Incarceration at a Large Inner-City Jail. *Open Forum Infect Dis*. 2018;5(suppl\_1):S379-S379.
32. Melendez AG. USA500 Methicillin-Resistant Staphylococcus aureus: An Evaluation of Clinical Virulence in Bacteremia. Farley MM, ed. 2014.
33. Kaplan-Lewis E, Aberg JA, Lee M. Aging with HIV in the ART era. *Semin Diagn Pathol*. 2017;34(4):384-397.
34. Mermel LA. Short-term Peripheral Venous Catheter–Related Bloodstream Infections: A Systematic Review. *Clin Infect Dis*. 2017;65(10):1757-1762.
35. Von Eiff C, Becker K, Machka K, Stammer H, Peters G. Nasal carriage as a source of Staphylococcus aureus bacteremia. *N Engl J Med*. 2001;344(1):11-16.
36. Davis KA, Stewart JJ, Crouch HK, Florez CE, Hospenthal DR. Methicillin-resistant Staphylococcus aureus (MRSA) nares colonization at hospital admission and its effect on subsequent MRSA infection. *Clin Infect Dis*. 2004;39(6):776-782.
37. Popovich KJ, Snitkin ES, Hota B, et al. Genomic and Epidemiological Evidence for Community Origins of Hospital-Onset Methicillin-Resistant Staphylococcus aureus Bloodstream Infections. *J Infect Dis*. May 2017.
38. Austin ED, Sullivan SB, Whittier S, Lowy FD, Uhlemann A-C. Peripheral Intravenous Catheter Placement Is an Underrecognized Source of Staphylococcus aureus Bloodstream Infection. *Open Forum Infect Dis*. 2016;3(2):ofw072.

39. Fowler VG Jr, Olsen MK, Corey GR, et al. Clinical identifiers of complicated *Staphylococcus aureus* bacteremia. *Arch Intern Med.* 2003;163(17):2066-2072.
40. Kourtis AP, Hatfield K, Baggs J, et al. Vital Signs: Epidemiology and Recent Trends in Methicillin-Resistant and in Methicillin-Susceptible *Staphylococcus aureus* Bloodstream Infections - United States. *MMWR Morb Mortal Wkly Rep.* 2019;68(9):214-219.

**Table 1.** Demographics and Clinical Characteristics of Patients

| <b>Factor, n (%)</b>                        | <b>MRSA BSI<br/>(n = 227)</b> | <b>Factor, n (%)</b>                    | <b>MRSA BSI<br/>(n = 227)</b> |
|---------------------------------------------|-------------------------------|-----------------------------------------|-------------------------------|
| <i>Clonal Complex</i>                       |                               | <i>Leukemia</i>                         |                               |
| CC8                                         | 110 (48)                      | Lymphoma/Multiple Myeloma               | 13 (6)                        |
| CC5                                         | 117 (52)                      | Moderate/Severe Liver Disease           | 26 (11)                       |
| <i>Sex</i>                                  |                               | <i>Metastatic Solid Tumor</i>           |                               |
| Male                                        | 151 (67)                      | <i>Charlson Comorbidity Index (CCI)</i> | 14 (6)                        |
| Female                                      | 76 (33)                       | 0-3                                     | 71 (31)                       |
| <i>Race/Ethnicity</i>                       |                               | 4-5                                     | 48 (21)                       |
| Non-Hispanic White                          | 98 (43)                       | 6-8                                     | 65 (29)                       |
| Non-Hispanic Black                          | 63 (28)                       | >8                                      | 43 (19)                       |
| Hispanic/Latino                             | 46 (20)                       | <i>History of Transplant</i>            |                               |
| Asian                                       | 8 (4)                         | 32 (14)                                 |                               |
| Unknown                                     | 12 (5)                        | <i>History of MRSA Colonization</i>     |                               |
| <i>Age at Time of Infection</i>             |                               | 94 (41)                                 |                               |
| 18-54 Years                                 | 80 (35)                       | <i>Presumed Source of MRSA BSI</i>      |                               |
| 55-69 Years                                 | 68 (30)                       | Peripheral Intravenous Catheter         | 16 (7)                        |
| ≥ 70 Years                                  | 79 (35)                       | Skin & Soft Tissue Infection            | 26 (11)                       |
| <i>History of Injection Drug Use</i>        |                               | Pneumonia                               | 24 (11)                       |
| HIV                                         | 23 (10)                       | Diabetic Foot Infection                 | 17 (7)                        |
| <i>Admission Source</i>                     |                               | Vascular Access                         | 78 (34)                       |
| Home                                        | 132 (58)                      | Septic Arthritis                        | 3 (1)                         |
| NH/Rehab/LTACH                              | 60 (26)                       | Urinary Source                          | 4 (2)                         |
| Outside Hospital                            | 35 (15)                       | Sacral Wound                            | 11 (5)                        |
| <i>Prior Hospital Admission (90 Days)</i>   |                               | Other/Unknown                           | 28 (12)                       |
| 162 (71)                                    |                               | <i>ICU Admission Prior to BSI</i>       |                               |
| <i>Length of Hospital Stay Prior to BSI</i> |                               | 42 (19)                                 |                               |
| ≤3 Days                                     | 132 (58)                      |                                         |                               |
| >3 Days                                     | 95 (42)                       |                                         |                               |
| <i>Frequent Healthcare Interaction</i>      |                               |                                         |                               |
| Hemodialysis                                | 40 (18)                       |                                         |                               |
| Infusion Center                             | 34 (15)                       |                                         |                               |
| None                                        | 153 (67)                      |                                         |                               |
| <i>Presence of Invasive Device</i>          |                               |                                         |                               |
| 179 (79)                                    |                               |                                         |                               |
| <i>Invasive Procedures</i>                  |                               |                                         |                               |
| 109 (48)                                    |                               |                                         |                               |
| <i>Wound Present</i>                        |                               |                                         |                               |
| 94 (41)                                     |                               |                                         |                               |
| <i>Comorbidities</i>                        |                               |                                         |                               |
| Myocardial Infarction                       | 23 (10)                       |                                         |                               |
| Congestive Heart Failure                    | 54 (24)                       |                                         |                               |
| Peripheral Vascular Disease                 | 37 (16)                       |                                         |                               |
| Cerebrovascular Disease                     | 20 (9)                        |                                         |                               |
| Dementia                                    | 29 (13)                       |                                         |                               |
| Chronic Pulmonary Disease                   | 30 (13)                       |                                         |                               |
| Connective Tissue Disease                   | 5 (2)                         |                                         |                               |
| Peptic Ulcer Disease                        | 8 (4)                         |                                         |                               |
| Mild Liver Disease                          | 2 (1)                         |                                         |                               |
| Diabetes (no complications)                 | 37 (16)                       |                                         |                               |
| Diabetes with Organ Damage                  | 51 (22)                       |                                         |                               |
| Para or Hemiplegia                          | 17 (7)                        |                                         |                               |
| Moderate/Severe Renal Disease               | 55 (24)                       |                                         |                               |
| Solid Tumor                                 | 23 (10)                       |                                         |                               |

**Table 2.** Demographics and Clinical Characteristics of MRSA BSIs in Patients Stratified by Clonal Complex with the Odds of Being CC8 vs CC5

| Factor                                      | CC8         |             | CC5                      |                  | Univariate Analysis      |              | Multivariate Analysis |  |
|---------------------------------------------|-------------|-------------|--------------------------|------------------|--------------------------|--------------|-----------------------|--|
|                                             | N = 110 (%) | N = 117 (%) | OR (95% CI)              | p value          | OR (95% CI)              | p value      |                       |  |
| Male                                        | 73 (66)     | 78 (67)     | 0.99 (0.57-1.71)         | 0.96             |                          |              |                       |  |
| <i>Race/Ethnicity</i>                       |             |             |                          |                  |                          |              |                       |  |
| Non-Hispanic White                          | 31 (28)     | 67 (57)     | Reference                |                  | Reference                |              |                       |  |
| Non-Hispanic Black                          | 41 (37)     | 22 (19)     | <b>3.99 (1.96-8.34)</b>  | <b>&lt;0.001</b> | <b>3.21 (1.42-7.22)</b>  | <b>0.005</b> |                       |  |
| Hispanic/Latino                             | 27 (25)     | 19 (16)     | <b>3.05 (1.40-6.77)</b>  | <b>0.004</b>     | <b>2.99 (1.25-7.12)</b>  | <b>0.01</b>  |                       |  |
| Asian                                       | 4 (4)       | 4 (3)       | 2.14 (0.37-12.32)        | 0.49             | 3.01 (0.59-15.26)        | 0.18         |                       |  |
| Unknown                                     | 7 (6)       | 5 (4)       | 2.99 (0.75-12.97)        | 0.14             | 2.16 (0.52-9.05)         | 0.29         |                       |  |
| <i>Age at Time of Infection</i>             |             |             |                          |                  |                          |              |                       |  |
| 18-54 Years                                 | 50 (45)     | 30 (26)     | Reference                |                  | Reference                |              |                       |  |
| 55-69 Years                                 | 37 (34)     | 31 (27)     | 0.72 (0.37-1.38)         | 0.32             | 0.65 (0.28-1.50)         | 0.31         |                       |  |
| ≥ 70 Years                                  | 23 (21)     | 56 (48)     | <b>0.25 (0.13-0.48)</b>  | <b>&lt;0.001</b> | <b>0.31 (0.12-0.81)</b>  | <b>0.02</b>  |                       |  |
| History of Injection Drug Use               | 16 (15)     | 7 (6)       | <b>2.66 (0.99-8.00)</b>  | <b>0.05</b>      | 0.84 (0.27-2.61)         | 0.77         |                       |  |
| HIV                                         | 18 (16)     | 4 (3)       | <b>5.49 (1.73-23.08)</b> | <b>0.002</b>     | <b>3.71 (1.06-13.05)</b> | <b>0.04</b>  |                       |  |
| <i>Admission Source</i>                     |             |             |                          |                  |                          |              |                       |  |
| Home                                        | 78 (71)     | 54 (46)     | Reference                |                  | Reference                |              |                       |  |
| NH/Rehab/LTACH                              | 23 (21)     | 37 (32)     | <b>0.43 (0.23-0.80)</b>  | <b>0.008</b>     | 0.57 (0.25-1.30)         | 0.18         |                       |  |
| Other Hospital                              | 9 (8)       | 26 (22)     | <b>0.24 (0.10-0.55)</b>  | <b>&lt;0.001</b> | 0.36 (0.12-1.09)         | 0.07         |                       |  |
| Prior Hospital Admission (90 Days)          | 70 (64)     | 92 (79)     | <b>0.48 (0.26-0.86)</b>  | <b>0.01</b>      | 0.88 (0.38-2.02)         | 0.76         |                       |  |
| <i>Length of Hospital Stay Prior to BSI</i> |             |             |                          |                  |                          |              |                       |  |
| ≤3 Days                                     | 74 (67)     | 58 (50)     | <b>2.09 (1.22-3.58)</b>  | <b>0.007</b>     | 2.00 (0.90-4.44)         | 0.09         |                       |  |
| >3 Days                                     | 36 (33)     | 59 (50)     | Reference                |                  | Reference                |              |                       |  |
| <i>Frequent Healthcare Interaction</i>      |             |             |                          |                  |                          |              |                       |  |
| Hemodialysis                                | 22 (20)     | 18 (15)     | 1.45 (0.72-2.92)         | 0.30             |                          |              |                       |  |
| Infusion Center                             | 18 (16)     | 16 (14)     | 1.33 (0.63-2.81)         | 0.45             |                          |              |                       |  |
| None                                        | 70 (64)     | 83 (71)     | Reference                |                  |                          |              |                       |  |
| <sup>a</sup> Presence of Invasive Device    | 77 (70)     | 102 (87)    | <b>0.34 (0.17-0.68)</b>  | <b>0.002</b>     | 0.65 (0.28-1.53)         | 0.33         |                       |  |
| <sup>b</sup> Invasive Procedures            | 44 (40)     | 65 (56)     | <b>0.53 (0.32-0.90)</b>  | <b>0.02</b>      | 0.71 (0.33-1.56)         | 0.39         |                       |  |
| Wound Present                               | 46 (42)     | 48 (41)     | 1.03 (0.61-1.75)         | 0.90             |                          |              |                       |  |
| <i>Charlson Comorbidity Index (CCI)</i>     |             |             |                          |                  |                          |              |                       |  |
| 0-3                                         | 39 (35)     | 32 (27)     | Reference                |                  | Reference                |              |                       |  |
| 4-5                                         | 26 (24)     | 22 (19)     | 0.97 (0.47-2.02)         | 0.93             | 1.38 (0.52-3.64)         | 0.52         |                       |  |
| 6-8                                         | 30 (27)     | 35 (30)     | 0.70 (0.36-1.38)         | 0.31             | 1.19 (0.46-3.05)         | 0.72         |                       |  |
| >8                                          | 15 (14)     | 28 (24)     | <b>0.44 (0.20-0.96)</b>  | <b>0.04</b>      | 0.76 (0.23-2.50)         | 0.65         |                       |  |
| History of Transplant                       | 14 (13)     | 18 (15)     | 0.80 (0.38-1.70)         | 0.57             |                          |              |                       |  |
| History of MRSA Colonization                | 47 (43)     | 47 (40)     | 1.11 (0.66-1.89)         | 0.70             |                          |              |                       |  |
| <i>Presumed Source of MRSA BSI</i>          |             |             |                          |                  |                          |              |                       |  |
| Peripheral Intravenous Catheter             | 11 (10)     | 5 (4)       | 2.48 (0.76-9.43)         | 0.15             | <b>5.87 (1.50-22.89)</b> | <b>0.01</b>  |                       |  |
| Skin & Soft Tissue Infection                | 18 (16)     | 8 (7)       | <b>2.67 (1.11-6.41)</b>  | <b>0.03</b>      | 2.28 (0.73-7.09)         | 0.16         |                       |  |
| Pneumonia                                   | 12 (11)     | 12 (10)     | 1.07 (0.46-2.50)         | 0.87             |                          |              |                       |  |
| Diabetic Foot Infection                     | 8 (7)       | 9 (8)       | 0.94 (0.35-2.53)         | 0.90             |                          |              |                       |  |
| Vascular Access                             | 35 (32)     | 43 (37)     | 0.80 (0.46-1.39)         | 0.43             |                          |              |                       |  |
| Septic Arthritis                            | 1 (1)       | 2 (2)       | 0.53 (0.01-10.30)        | 1.00             |                          |              |                       |  |
| Urinary Source                              | 1 (1)       | 3 (3)       | 0.35 (0.01-4.44)         | 0.67             |                          |              |                       |  |
| Sacral Wound                                | 6 (5)       | 5 (4)       | 1.29 (0.32-5.52)         | 0.91             |                          |              |                       |  |
| Other/Unknown                               | 12 (11)     | 16 (14)     | 0.77 (0.32-1.85)         | 0.67             |                          |              |                       |  |
| ICU Admission Prior to BSI                  | 16 (15)     | 26 (22)     | 0.60 (0.30-1.18)         | 0.14             | 1.37 (0.50-3.73)         | 0.54         |                       |  |

**Bold** = significant at ≤ 0.05

Abbreviations: MRSA, Methicillin-resistant *Staphylococcus aureus*; BSI, bloodstream infection; NH, nursing home; rehab, rehabilitation facility; LTACH, long-term acute care hospital; BSI, bloodstream infection; HIV, human immunodeficiency virus; AIDS, acquired immune deficiency syndrome; ICU, intensive care unit.

<sup>a</sup> Includes devices such as pacemaker, any vascular access, orthopedic hardware, foley catheter, arteriovenous graft placement, percutaneous endoscopic gastronomy (PEG), ostomy, or any type of urinary collection at the time of first positive bloodstream infection.

<sup>b</sup> Includes invasive procedures or surgery within the month prior to first positive bloodstream infection, excluding electroencephalogram (EEG), electrocardiogram (EKG), or transthoracic echocardiogram (TTE).



**Table 3.** Demographics and Clinical Characteristics of MRSA BSIs Stratified by CO-MRSA and HO-MRSA with the Odds of being CO-MRSA

| Factor                                   | CO-MRSA<br>N = 132 (%) | HO-MRSA<br>N = 95 (%) | Univariate Analysis      |                  | Multivariate Analysis    |                  |
|------------------------------------------|------------------------|-----------------------|--------------------------|------------------|--------------------------|------------------|
|                                          |                        |                       | OR (95% CI)              | p value          | OR (95% CI)              | p value          |
| CC8                                      | 74 (56)                | 36 (38)               | <b>2.09 (1.22-3.58)</b>  | <b>0.007</b>     | <b>2.52 (1.16-5.50)</b>  | <b>0.02</b>      |
| Male                                     | 90 (68)                | 61 (64)               | 1.19 (0.68-2.08)         | 0.53             |                          |                  |
| <i>Race/Ethnicity</i>                    |                        |                       |                          |                  |                          |                  |
| Non-Hispanic White                       | 50 (38)                | 48 (51)               | Reference                |                  |                          |                  |
| Non-Hispanic Black                       | 40 (30)                | 23 (24)               | 1.66 (0.83-3.37)         | 0.16             |                          |                  |
| Hispanic/Latino                          | 30 (23)                | 16 (17)               | 1.79 (0.83-4.00)         | 0.15             |                          |                  |
| Asian                                    | 6 (5)                  | 2 (2)                 | 2.85 (0.48-30.26)        | 0.35             |                          |                  |
| Unknown                                  | 6 (5)                  | 6 (6)                 | 0.96 (0.24-3.87)         | 1.00             |                          |                  |
| <i>Age at Time of Infection</i>          |                        |                       |                          |                  |                          |                  |
| 18-54 Years                              | 44 (33)                | 36 (38)               | Reference                |                  |                          |                  |
| 55-69 Years                              | 44 (33)                | 24 (25)               | 1.50 (0.77-2.92)         | 0.23             |                          |                  |
| ≥ 70 Years                               | 44 (33)                | 35 (37)               | 1.03 (0.55-1.92)         | 0.93             |                          |                  |
| History of Injection Drug Use            | 17 (13)                | 6 (6)                 | 2.19 (0.78-7.06)         | 0.16             | 0.48 (0.13-1.82)         | 0.28             |
| HIV                                      | 13 (10)                | 9 (9)                 | 1.04 (0.39-2.90)         | 1.00             |                          |                  |
| <i>Admission Source</i>                  |                        |                       |                          |                  |                          |                  |
| Home                                     | 80 (61)                | 52 (55)               | Reference                |                  | Reference                |                  |
| NH/Rehab/LTACH                           | 40 (30)                | 20 (21)               | 1.30 (0.69-2.47)         | 0.42             | 0.88 (0.35-2.26)         | 0.80             |
| Other Hospital                           | 12 (9)                 | 23 (24)               | <b>0.34 (0.16-0.74)</b>  | <b>0.007</b>     | 0.80 (0.27-2.40)         | 0.69             |
| Prior Hospital Admission (90 Days)       | 91 (69)                | 71 (75)               | 0.75 (0.42-1.36)         | 0.34             |                          |                  |
| <i>Frequent Healthcare Interaction</i>   |                        |                       |                          |                  |                          |                  |
| Hemodialysis                             | 33 (25)                | 7 (7)                 | <b>3.46 (1.39-9.87)</b>  | <b>0.005</b>     | <b>4.62 (1.33-16.05)</b> | <b>0.02</b>      |
| Infusion Center                          | 11 (8)                 | 23 (24)               | <b>0.36 (0.15-0.82)</b>  | <b>0.01</b>      | 0.35 (0.12-1.04)         | 0.06             |
| None                                     | 88 (67)                | 65 (68)               | Reference                |                  | Reference                |                  |
| <sup>a</sup> Presence of Invasive Device | 94 (71)                | 85 (90)               | <b>0.29 (0.14-0.62)</b>  | <b>0.001</b>     | 0.52 (0.18-1.49)         | 0.22             |
| <sup>b</sup> Invasive Procedures         | 37 (28)                | 72 (76)               | <b>0.12 (0.07-0.23)</b>  | <b>&lt;0.001</b> | <b>0.19 (0.09-0.41)</b>  | <b>&lt;0.001</b> |
| Wound Present                            | 58 (44)                | 36 (38)               | 1.29 (0.75-2.20)         | 0.36             |                          |                  |
| <i>Charlson Comorbidity Index (CCI)</i>  |                        |                       |                          |                  |                          |                  |
| 0-3                                      | 38 (29)                | 33 (35)               | Reference                |                  | Reference                |                  |
| 4-5                                      | 24 (18)                | 24 (25)               | 0.87 (0.42-1.81)         | 0.71             | 1.45 (0.51-4.09)         | 0.48             |
| 6-8                                      | 39 (30)                | 26 (27)               | 1.30 (0.66-2.57)         | 0.45             | 1.05 (0.39-2.85)         | 0.92             |
| >8                                       | 31 (23)                | 12 (13)               | <b>2.24 (1.00-5.06)</b>  | <b>0.05</b>      | 2.11 (0.64-7.00)         | 0.22             |
| History of Transplant                    | 13 (10)                | 19 (20)               | <b>0.44 (0.20-0.94)</b>  | <b>0.03</b>      | 1.06 (0.37-3.04)         | 0.91             |
| History of MRSA Colonization             | 58 (44)                | 36 (38)               | 1.29 (0.75-2.20)         | 0.36             |                          |                  |
| <i>Presumed Source of MRSA Infection</i> |                        |                       |                          |                  |                          |                  |
| Peripheral Intravenous Catheter          | 6 (6)                  | 10 (11)               | 0.41 (0.12-1.29)         | 0.14             | <b>0.11 (0.03-0.43)</b>  | <b>0.002</b>     |
| Skin & Soft Tissue Infection             | 18 (14)                | 8 (8)                 | 1.71 (0.67-4.78)         | 0.31             |                          |                  |
| Pneumonia                                | 14 (11)                | 10 (11)               | 1.01 (0.43-2.38)         | 0.98             |                          |                  |
| Diabetic Foot Infection                  | 15 (11)                | 2 (2)                 | <b>5.93 (1.33-54.70)</b> | <b>0.01</b>      | 2.15 (0.36-12.92)        | 0.40             |
| Vascular Access                          | 36 (27)                | 42 (44)               | <b>0.47 (0.27-0.83)</b>  | <b>0.009</b>     | <b>0.37 (0.14-0.96)</b>  | <b>0.04</b>      |
| Septic Arthritis                         | 1 (1)                  | 2 (2)                 | 0.36 (0.01-6.94)         | 0.76             |                          |                  |
| Urinary Source                           | 3 (2)                  | 1 (1)                 | 2.18 (0.17-115.96)       | 0.89             |                          |                  |
| Sacral Wound                             | 9 (7)                  | 2 (2)                 | 3.39 (0.68-32.95)        | 0.18             | 0.68 (0.11-4.32)         | 0.68             |
| Other/Unknown                            | 16 (12)                | 12 (13)               | 0.95 (0.43-2.12)         | 0.91             |                          |                  |
| ICU Admission Prior to BSI               | 5 (4)                  | 37 (39)               | <b>0.06 (0.02-0.17)</b>  | <b>&lt;0.001</b> | <b>0.12 (0.04-0.39)</b>  | <b>&lt;0.001</b> |

**Bold** = significant at  $\leq 0.05$

Abbreviations: MRSA, Methicillin-resistant *Staphylococcus aureus*; BSI, bloodstream infection; CO, community-onset; HO, hospital-onset; NH, nursing home; rehab, rehabilitation facility; LTACH, long-term acute care hospital; BSI, bloodstream infection; HIV, human immunodeficiency virus; AIDS, acquired immune deficiency syndrome; ICU, intensive care unit.

<sup>a</sup> Includes devices such as pacemaker, any vascular access, orthopedic hardware, foley catheter, arteriovenous graft placement, percutaneous endoscopic gastronomy (PEG), ostomy, or any type of urinary collection at the time of first positive bloodstream infection.

<sup>b</sup> Includes invasive procedures or surgery within the month prior to first positive bloodstream infection, excluding electroencephalogram (EEG), electrocardiogram (EKG), or transthoracic echocardiogram (TTE).

**Figure 1. Gene distribution based on zip code.**

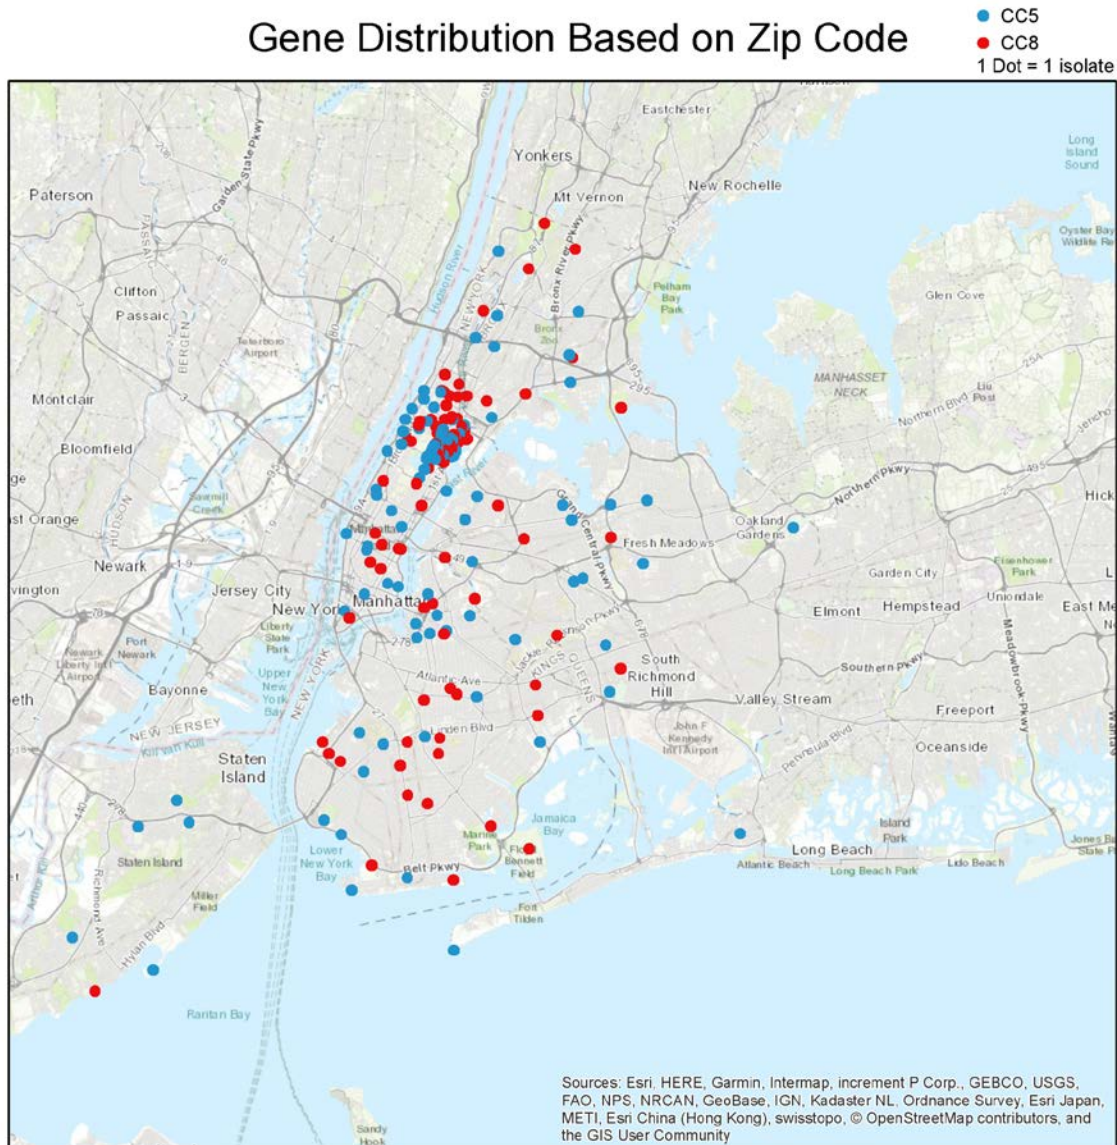

Geographic information system (GIS) map of New York City illustrating the distribution of each patient isolate stratified by clonal complex (CC). The map excludes 40 isolates that were located outside of the New York City borough boundary. Of the 185 isolates mapped, 96 belong to CC5 and 89 belong to CC8.

**Figure 2. Death Related to MRSA BSI within 90 Days Stratified by Clone.**

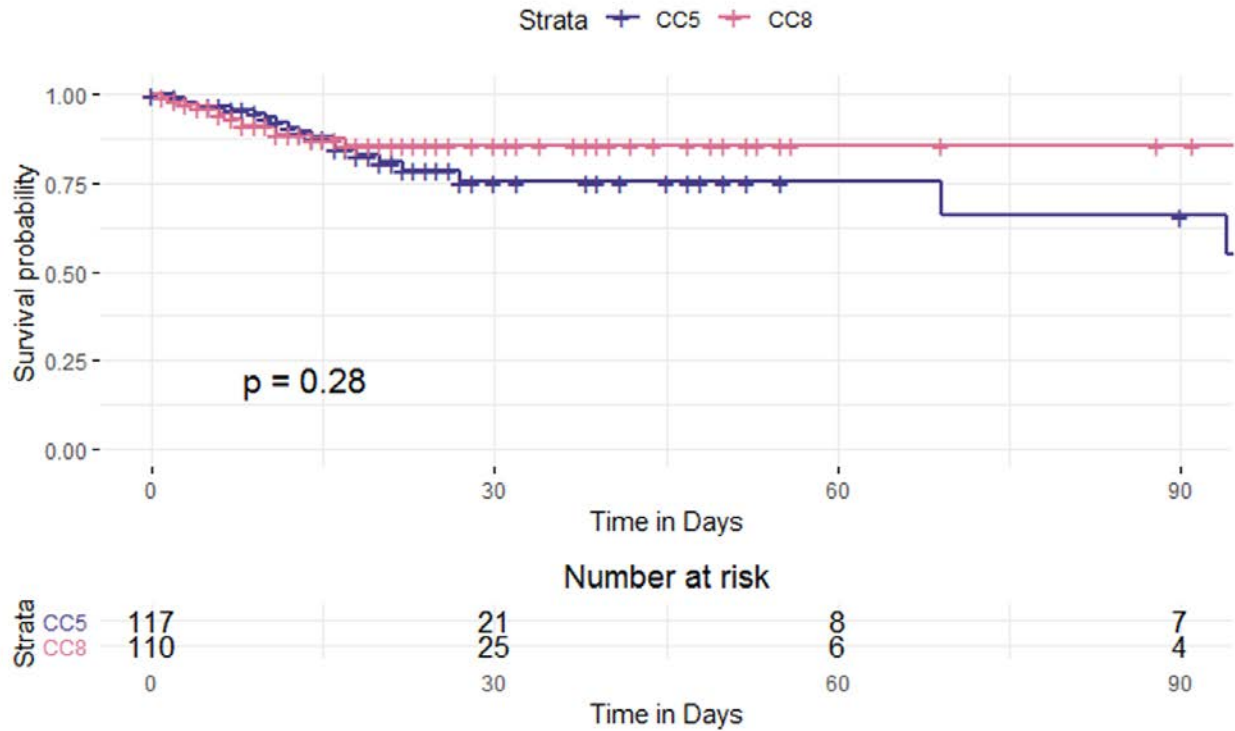

Survival analyses of the CC8 and the CC5 clones 90-days from the first positive MRSA culture. Tick marks represent a censored patient due to discharge from the hospital. Risk tables reflect the number of patients still at risk of death at 30, 60, and 90 days.

**Figure 3. Multivariate Analysis of Death Related to MRSA BSI within 90 Days.**

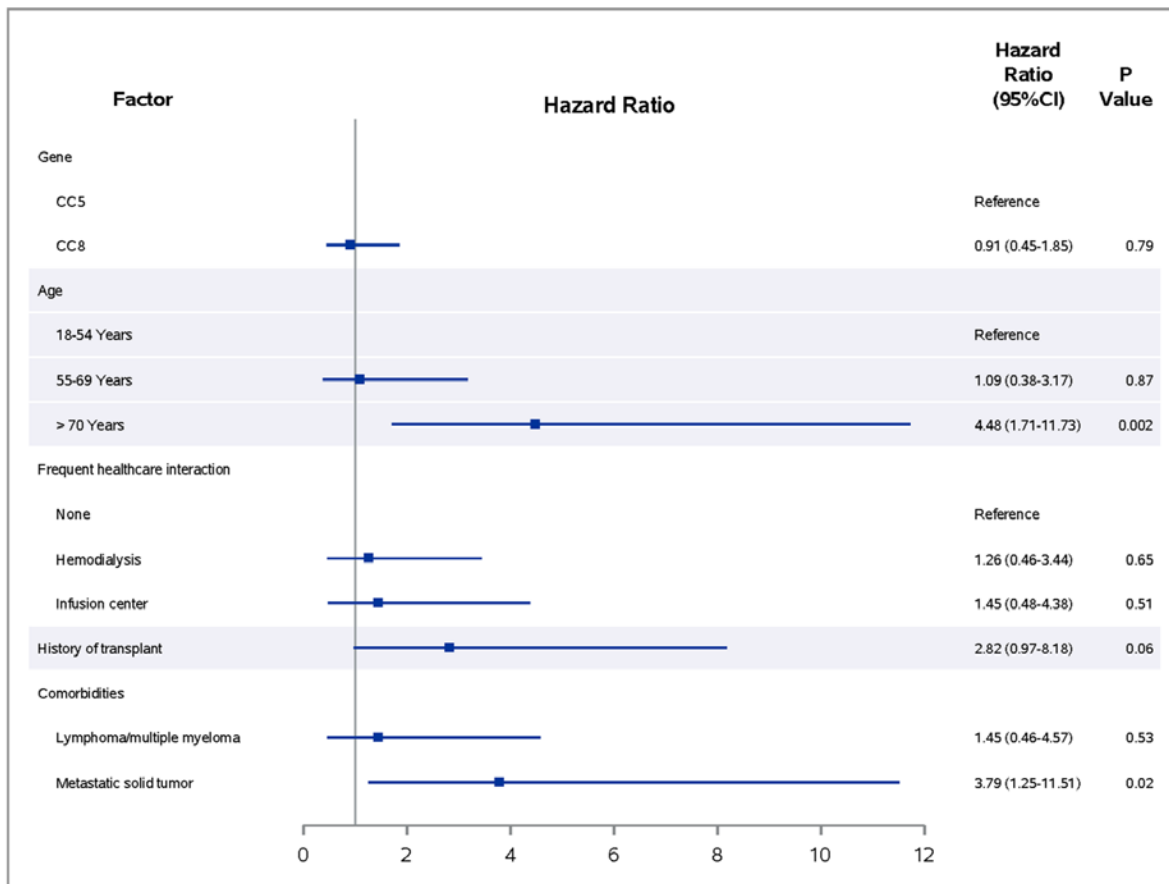

Forest plot of the multivariate Cox regression for all variables that had  $p \leq 0.2$  in the univariate analysis. The square represents the hazard ratio (HR), and the lines reflect the 95% confidence interval.
