1 **Blurred molecular epidemiological lines between the two dominant methicillin-**  
2 **resistant *Staphylococcus aureus* clones**

3 Amy C. Dupper, MPH, MA<sup>1</sup>, Mitchell J. Sullivan, PhD<sup>2</sup>, Kieran I. Chacko, BA, BS<sup>2</sup>,  
4 Aaron Mishkin, MD<sup>1</sup>, Brianne Ciferri, MPH<sup>2</sup>, Ajay Kumaresh, PhD<sup>2,3</sup>, Ana Berbel Caban,  
5 MD<sup>1</sup>, Irina Oussenko, PhD<sup>2</sup>, Colleen Beckford, MS<sup>2</sup>, Nathalie E. Zeitouni, PhD<sup>2\*</sup>,  
6 Robert Sebra, PhD<sup>2,3</sup>, Camille Hamula, PhD<sup>4</sup>, Melissa Smith, PhD<sup>2,3</sup>, Andrew  
7 Kasarskis, PhD<sup>2,3</sup>, Gopi Patel, MD, MS<sup>1</sup>, Russell B. McBride, PhD, MPH<sup>4</sup>, Harm van  
8 Bakel, PhD<sup>2,3</sup>, and Deena R. Altman, MD, MS<sup>1,2</sup>

9 <sup>1</sup>Department of Medicine, Division of Infectious Diseases, Icahn School of Medicine at  
10 Mount Sinai, New York City, USA

11 <sup>2</sup>Department of Genetics and Genomic Sciences, Icahn School of Medicine at Mount  
12 Sinai, New York City, USA

13 <sup>3</sup>Icahn Institute for Data Science and Genomic Technology, Icahn School of Medicine at  
14 Mount Sinai, New York City, USA

15 <sup>4</sup>Department of Pathology, Icahn School of Medicine at Mount Sinai, New York City,  
16 USA

17 \*Current affiliation is National Biodefense Analysis and Countermeasures Center  
18 (NBACC), 8300 Research Plaza, Fort Detrick, MD 21702

19 Running Head: Epidemiological features of *S. aureus*

20 Address correspondence to: Deena Altman, MD, [deena.altman@mssm.edu](mailto:deena.altman@mssm.edu)  
21 (corresponding author) or Amy Dupper, MPH, [amy.dupper1@mssm.edu](mailto:amy.dupper1@mssm.edu) (alternate  
22 corresponding author)

23 Keywords: Methicillin-resistant *Staphylococcus aureus*, peripheral intravenous  
24 catheters, bloodstream infections, molecular epidemiology

25 *Abstract*

## 26 **Background**

27 Methicillin-resistant *Staphylococcus aureus* (MRSA) causes life-threatening infections in  
28 both community and hospital settings and is a leading cause of healthcare-associated  
29 infections (HAIs). We sought to describe the molecular epidemiological landscape of  
30 patients with MRSA bloodstream infections (BSIs) at an urban medical center by  
31 evaluating the clinical characteristics associated with the two dominant endemic clones.

## 32 **Methods**

33 Comprehensive clinical data extraction from the electronic health records of 227  
34 hospitalized patients  $\geq 18$  years old with MRSA BSI over a 33-month period in New York  
35 City were collected. The descriptive epidemiology and mortality associated with the two  
36 dominant clones was compared using logistic regression.

## 37 **Results**

38 Molecular analysis revealed that 91% of all single-patient MRSA BSIs were due to two  
39 equally represented genotypes, clonal complex (CC) 5 (N=117) and CC8 (N=110).  
40 MRSA BSIs were associated with a 90-day mortality of 27%. CC8 caused disease more

41 frequently in younger age groups ( $56 \pm 17$  vs  $67 \pm 17$  years old;  $p < 0.001$ ) and in non-  
42 White race (OR=3.45 95% CI [1.51-7.87];  $p = 0.003$ ), with few other major distinguishing  
43 features. Morbidity and mortality also did not differ significantly between the two clones.  
44 CC8 caused BSIs more frequently in the setting of peripheral intravenous catheters  
45 (OR=5.96; 95% CI [1.51-23.50];  $p = 0.01$ ).

## 46 **Conclusion**

47 The clinical features distinguishing dominant MRSA clones continue to converge. The  
48 association of CC8 with peripheral intravenous catheter infections underscores the  
49 importance of classical community clones causing hospital-onset infections. Ongoing  
50 monitoring and analysis of the dynamic epidemiology of this endemic pathogen is  
51 crucial to inform management to prevent disease.

## 52 *Introduction*

53 Healthcare-associated infections (HAIs) pose a potentially fatal threat to patients  
54 worldwide<sup>1</sup> and *Staphylococcus aureus* is one of the most common causes of HAIs in  
55 the United States.<sup>2,3</sup> Methicillin-resistant *S. aureus* (MRSA) bloodstream infections  
56 (BSIs) are linked with mortality up to 30% and are associated with longer hospital stays  
57 and increased healthcare costs.<sup>4,5</sup> MRSA has long been present in healthcare settings  
58 but is now well established in the community.<sup>6</sup> The two dominant MRSA clones in the  
59 United States are clonal complex (CC) 5 and CC8.<sup>3</sup> Historically, CC5 has been  
60 associated with older individuals with hospital or long-term care facility contact.<sup>6</sup> In  
61 contrast, CC8, predominantly the USA300 pulsotype, was first reported in the US in  
62 healthy children in 1990s and raised concern for its capacity to cause severe disease in

63 healthy individuals.<sup>7</sup> Over the following two decades, CC8, largely driven by the  
64 USA300 lineage, became established as the predominant community-associated clone,  
65 presenting as skin and soft tissue infections (SSTIs) in athletes, children in day-care  
66 centers, injection drug users, and in persons with human immunodeficiency virus (HIV)  
67 infection.<sup>8,9</sup>

68 The prevalence of CC8 has increased in healthcare settings and is now  
69 associated with as many inpatient infections as CC5.<sup>6,9</sup> In this connection, we sought to  
70 update and expand on the clinical aspects of the molecular epidemiology of MRSA BSIs  
71 in a major academic medical center in New York City. We examined the differences  
72 between the two dominant clonal complexes, CC5 and CC8, and their associated  
73 clinical and epidemiological features. We additionally studied clonal associations in the  
74 context of current surveillance definitions as defined by the National Healthcare Safety  
75 Network (NHSN), which are reportable.<sup>10</sup> We explored clones in the context of  
76 associations with inpatient and outpatient community healthcare networks. Finally, we  
77 examined subgroups within the two CCs with an interest in the clinical features of the  
78 USA500, a relatively understudied clone.<sup>11,12</sup> With extensive clinical detail we describe a  
79 picture more complex than genotypic associations are able to describe.

## 80 *Methods*

### 81 Study setting, patient identification, and molecular typing

82 The Mount Sinai Hospital (MSH) is a 1,018-bed tertiary- and quaternary-care  
83 facility. Under the approval of the MSH institutional review board, data were captured on  
84 a total of 249 adult ( $\geq 18$  years old) patients with MRSA BSIs by the MSH Clinical  
85 Microbiology Laboratory as part of standard clinical care between August 2014 and April

86 2017. Identification and susceptibility of MRSA was performed using VITEK<sup>®</sup>2  
87 (bioMerieux). From a hospital-wide genomic surveillance program, we derived the CC  
88 and multilocus sequence typing (MLST) *in silico* using the RESTful interface to the *S.*  
89 *aureus* PubMLST<sup>13</sup> database. Staphylococcal protein A (*spa*) and Panton-Valentine  
90 Leukocidin (PVL) were generated using a custom script  
91 ([https://github.com/mjsull/spa\\_typing](https://github.com/mjsull/spa_typing)) and BLAST+<sup>14</sup> respectively. Core-genome MLST  
92 types were determined using the schema available at  
93 (<https://www.cgmlst.org/ncs/schema/141106/>). A tree for the visualization of clusters  
94 was created using GrapeTree,<sup>15</sup> using representative published NCBI references  
95 (USA500: CP007499.1; USA100: GCA\_000525105; USA300: NC\_007793.1). The raw  
96 sequence data have been deposited in the National Center for Biotechnology  
97 Information SRA database under the Bioproject PRJNA470993.

#### 98 Patient data collection

99 Demographic and clinical data were obtained retrospectively from the electronic  
100 medical record system, including geographic admission data, presumed source of the  
101 BSI based on Infectious Diseases (ID) consultant, comorbidities, and prior outpatient  
102 healthcare exposures. All patients diagnosed with MRSA BSI received a consultation  
103 from an ID specialist at the time of diagnosis as per standard practice at our institution.  
104 The online database REDCap<sup>16</sup> was used for data capture and to calculate the  
105 Charlson Comorbidity Index (CCI).<sup>17</sup> Patients with non-CC5 or CC8 MRSA were  
106 excluded, resulting in a total of 227 patients for analyses. Zip codes were used to create  
107 a map of clones using the geographic information system (GIS) software ESRI Spatial  
108 Analysis.<sup>18</sup> Surveillance definitions included hospital-onset MRSA (HO-MRSA), defined

109 as positive cultures on or after the fourth day after hospital admission, and community-  
110 onset MRSA (CO-MRSA) defined as BSI presenting within the 72-hour hospital  
111 admission interval.<sup>10</sup>

## 112 Statistical analysis

113 We selected established clinical correlates related to prior epidemiological  
114 studies, including demographics, baseline comorbidities, admission sources, and  
115 infection sources. We also evaluated in-hospital outcomes and death, especially those  
116 related to the MRSA BSI. Variables were collapsed to make the final set of covariates  
117 informative and reflective of current published literature. Analyses were performed in  
118 SAS (ver.9.4),<sup>19</sup> and all figures were produced using R (ver.3.4.2).<sup>20</sup> Non-normally  
119 distributed continuous variables were categorized into discrete categorical groups.  
120 Variables were first analyzed in a univariate logistic regression model, with variables  
121  $p \leq 0.2$  then placed into a multivariate logistic regression model. Mortality analyses were  
122 analyzed using a Cox regression model. All variables with  $p \leq 0.05$  were considered  
123 statistically significant.

## 124 *Results*

### 125 Molecular composition of clones involved in MRSA BSI

126 Molecular analysis of single-patient, first episode MRSA BSI revealed the  
127 majority of MRSA BSIs were caused by the two dominant clones, CC5 and CC8 (Figure  
128 1, Supplementary Table 1). CC8 was the cause of BSI in 110 (44%), and CC5 in 117  
129 (47%) of the total of 249 cases, representing 91% of the entire population. Only 22 (9%)  
130 were non- CC5/CC8. Within CC5, the majority were either sequence type (ST) 5 (N=49;  
131 42%) or ST105 (N=61; 52%). Six percent (N=7) belonged to other STs within CC5. The

132 majority of CC8 isolates were ST8 (N=108; 98%) with 2 (2%) additional non-ST8 clones.  
133 The majority (N=64; 58%) of ST8 were *spa* type t008, along with 20 (18%) non-t008 *spa*  
134 types which also clustered with USA300. Additionally, CC8 included 24 (22%) *spa* type  
135 t064, including three (3%) non-t064 *spa* types, all clustering in the USA500 lineage.<sup>11,21</sup>

### 136 Baseline clinical characteristics of patients with MRSA BSIs

137 Sixty-seven percent of patients were male, and the median age at diagnosis was  
138 62 years old (Table 1). The racial and ethnic composition included non-Hispanic White  
139 (N=98; 43%), non-Hispanic Black (N=63; 28%), Hispanic/Latino (N=46; 20%), Asian  
140 (N=8; 4%), and not reported (N=12; 5%). MRSA BSIs were linked to a wide range of  
141 causes, with vascular access (N=78; 34%), pneumonia (N=24; 11%), and SSTIs (N=25;  
142 11%) representing the most common causes.

143 We performed a comprehensive analysis of admission sources. More than half of  
144 patients were admitted from home (N=128; 56%) with the remaining patients transferred  
145 in from nursing homes/rehabilitation/long-term care facilities (N=60; 26%), outside  
146 hospitals (N=35; 15%), or homeless shelters (N=4; 2%) (Table 1). Of subjects residing  
147 at home or group home settings, 32% (N=56) had frequent contact with healthcare  
148 centers either via outpatient dialysis (N=22; 12%) or infusion centers (N=34; 19%). Only  
149 27 (12%) study patients had no significant inpatient or outpatient healthcare exposure.

150 The mean CCI of subjects on hospital admission was 5.4. The most common  
151 comorbid medical conditions in our dataset were congestive heart failure (N=55; 24%)  
152 and chronic renal disease (N=55; 24%). Ten percent (N=22) of patients were co-  
153 infected with HIV. Additionally, 32 (14%) had a history of a transplant (solid organ or

154 bone marrow). Injection drug use was reported by 11% (N=24) of our population, and  
155 41% (N=94) had a prior history of MRSA colonization.

### 156 Clinical features and geographic distribution of the two dominant MRSA clones

157 As CC5 and CC8 were responsible for the majority of BSIs, we anchored our  
158 analyses on comparing these two clones. The majority of variables examined were not  
159 significantly increased in one clone over the other, with several notable exceptions.  
160 Race was found to confound the effects of HIV and injection drug use, so these two  
161 variables were retained in the final model. Logistic regression revealed that non-  
162 Hispanic Black race (OR=3.45; 95% CI [1.51-7.87];  $p=0.003$ ), Hispanic/Latino race  
163 (OR=3.21 95% CI [1.33-7.77];  $p=0.01$ ), HIV (OR=3.62 95% CI [1.01-12.92];  $p=0.05$ ),  
164 and SSTIs (OR=2.21; 95% CI [0.98-10.46];  $p=0.05$ ) had a higher likelihood of being  
165 infected with the CC8 (Table 2). Interestingly, CC8 was also increased in patients with  
166 peripheral intravenous catheters (PIVs) as the presumed source of MRSA BSI  
167 compared to CC5 (OR=5.96 95% CI [1.51-23.50];  $p=0.01$ ). Alternately, patients were  
168 less likely to have BSI with CC8 if they were greater than 70 years (OR=0.28 95% CI  
169 [0.11-0.74];  $p=0.01$ ) or if admitted from an outside hospital (OR=0.33 95% CI [0.11-  
170 1.00];  $p=0.05$ ) vs. home.

171 On multivariate analysis, there were equal proportions of CC8 vs CC5 across  
172 patient admission sources. We further mapped the clones according to patient zip code  
173 and found no significant clustering aside from the area surrounding the hospital  
174 (Supplementary Figure 1).

### 175 Clinical characteristics of patients with MRSA BSI due to clonal subgroups



176           Although we performed our top level analysis at the CC level, we additionally  
177 evaluated potential clinical differences between subgroups within the CCs. In CC8, a  
178 total of 27 CC8 isolates clustered with USA500, which is considered a healthcare-  
179 associated clone.<sup>11,12,21</sup> We thus compared USA500 to USA300 and found overall few  
180 differences aside from higher proportion of USA500 in those with HIV (OR=6.61 95% CI  
181 [1.38-31.67];  $p=0.02$ ) (Supplementary Table 2). We also compared ST105 and ST5  
182 lineages within CC5, which had few clinical distinctions (Supplementary Table 3).  
183 Stepwise removal of any of these subgroups did not impact results of our top level CC8  
184 vs. CC5 analyses, thus they were retained in the analyses.

#### 185 Addressing surveillance definitions in endemic settings

186           Given the importance placed on reporting BSIs based on NHSN definitions, we  
187 sought to provide clinical detail to the BSIs in the context of these definitions.<sup>10</sup> Overall  
188 there were more CO-MRSA BSIs (N=132; 58%) than HO-MRSA BSIs (N=95; 42%).  
189 Logistic regression revealed that patients characterized as CO-MRSA were more likely  
190 to have CC8 (OR=2.33 95% CI [1.03-5.27];  $p=0.04$ ), and more likely to be receiving  
191 hemodialysis at the time of infection (OR=4.62 95% CI [1.23-17.29];  $p=0.02$ ) (Table 3).  
192 Conversely, CO-MRSA was less likely to be associated with prior invasive procedures  
193 (OR=0.18 95% CI [0.08-0.40];  $p<0.001$ ), MRSA BSI from a PIV (OR=0.11 95% CI  
194 [0.03-0.46];  $p=0.002$ ), MRSA BSI from vascular access (OR=0.36 95% CI [0.13-0.95];  
195  $p=0.04$ ), and intensive care unit (ICU) admission prior to BSI (OR=0.13 95% CI [0.04-  
196 0.43];  $p<0.001$ ). Only 27 (12%) patients had no clear healthcare exposure, thus 88%  
197 of our total patient population had healthcare risk factors prior to their MRSA BSI.

198 We also examined CC8 vs CC5 in the context of the NHSN definitions. CC8 was  
199 responsible for 38% of HO-MRSA BSIs and was associated with younger age and non-  
200 Hispanic Black race (Supplementary Tables 4 & 5). Among patients grouped into the  
201 HO-MRSA stratum, those whose MRSA BSI resulted from a PIV (OR=9.84 95% CI  
202 [1.46-66.50];  $p=0.02$ ) were more likely to be from CC8. We also explored clones and  
203 definitions in the context of the individual comorbidities that constitute the CCI, and we  
204 found that those with lymphoma and/or multiple myeloma (OR=0.30 95% CI [0.11-0.80];  
205  $p=0.02$ ) were more likely to occur among HO-MRSA, yet in the CO-MRSA stratum,  
206 lymphoma and/or multiple myeloma was more likely to involve CC5 (OR=0.05 95% CI  
207 [0.01-0.48];  $p=0.01$ ).

#### 208 Differences in morbidity and mortality related to MRSA BSIs

209 Morbidity outcomes associated with MRSA BSI such as need for ICU admission,  
210 need for mechanical ventilation, and development of metastatic complications were  
211 studied with respect to clone. Overall, we found no differences in morbidity between the  
212 two clones (Supplementary Table 6C & D). Interestingly, strictly CO-MRSA had overall  
213 worse hospital outcomes, with increased ICU admissions (OR=10.73 95% CI [3.94-  
214 29.26];  $p<0.001$ ), mechanical ventilation (OR=3.45 95% CI [1.30-9.15];  $p=0.01$ ), and  
215 metastatic complications (OR=3.34 95% CI [1.46-7.64];  $p=0.004$ ) associated with MRSA  
216 BSI (Supplementary Table 6B). Overall, 20% (N=46) had persistent bacteremia (defined  
217 as BSI lasting >7 days) with no clonal predominance in these cases.

218 With regard to mortality, we examined 90-day all-cause and 90-day mortality  
219 associated with MRSA BSI. All-cause 90-day mortality was 27% (N=61) and of those  
220 that died at 90-days, death was associated with MRSA BSI in 54% (N=33) of cases. All-

221 cause 90-day mortality had a lower likelihood of death due to CC8 vs. CC5 (OR=0.55  
222 95% CI [0.30-1.00];  $p=0.05$ ), which was also observed in the CO-MRSA stratum  
223 (OR=0.43 95% CI [0.19-0.99];  $p=0.05$ ).

224 As a correlate for pathogenesis, we examined whether one clone had higher 90-  
225 day mortality in the setting of MRSA BSI. We first looked solely at the survival curves of  
226 each clone (Supplementary Figure 2), which revealed no difference. Second, we  
227 examined the clone variable in a multivariate Cox regression with possible confounders  
228 (Supplementary Figure 3). Interestingly, there was no difference in MRSA-related 90-  
229 day mortality related to MRSA with respect to clones (OR=0.91 95% CI [0.45-1.85];  
230  $p=0.79$ ). Ninety-day mortality related to MRSA was more likely to occur in individuals  
231 older than 70 years (OR=4.48 95% CI [1.71-11.73];  $p=0.002$ ) and those with metastatic  
232 solid tumors (OR=3.79 95% CI [1.25-11.51];  $p=0.02$ ). Finally, we examined 90-day  
233 mortality associated with MRSA BSI due to primary sources of bacteremia, which  
234 revealed higher mortality with MRSA BSI from pneumonia (OR=2.93 95% CI [0.98-  
235 8.74];  $p=0.05$ ) or septic arthritis (OR=5.80 95% CI [1.05-32.13];  $p=0.04$ ).

## 236 *Discussion*

237 As clones causing invasive MRSA infections are tied to specific populations,  
238 syndromes and settings, and are thought to behave differently, we sought to unravel  
239 how these associations manifest clinically in BSIs in a high level care institution in an  
240 endemic region. This study represents a large cohort of patients who were selected  
241 based strictly on presence of invasive disease (bacteremia) and demonstrate highly  
242 complex cases linked to significant morbidity and mortality. Consistent with previous  
243 reports from our region<sup>22,23</sup> and across the United States,<sup>3</sup> the majority of isolates were

244 either CC5 or CC8. We demonstrated that CC8, representing half of all MRSA BSIs,  
245 was more frequently seen in younger age and non-White race. These data support the  
246 described convergence of clinical features classically associated with the two dominant  
247 clones.<sup>6,24</sup> Although stratification by surveillance definitions was consistent with clones  
248 to an extent, it questions the applicability of definitions in endemic regions. These  
249 findings provide support for the concept that classic community genotypes involve  
250 individuals with frequent healthcare interactions.<sup>25</sup>

251         Although CC8/USA300 has been considered hypervirulent, by causing disease in  
252 younger, healthier individuals,<sup>24,26,27</sup> work performed in animal models does not always  
253 actualize in complex human infections.<sup>28,29</sup> Our study did not find significant differences  
254 in mortality and other outcomes based on MRSA clone, even after adjusting for  
255 comorbidities. This suggests that apparent differences driving morbidity and mortality  
256 are not solely due to differences between genotypes but due to a complex combination  
257 of demographic, host, and genomic factors, which require further study in human  
258 populations. Patients in our study had a CCI of 5.4, which is higher than most other  
259 studies that cite ranges of 1.5-3.<sup>17,24</sup> We found increased mortality in the setting of  
260 MRSA BSI among those older than 70 years and those with metastatic solid tumors.  
261 Although these underlying conditions are independently associated with an increased  
262 risk for death, these data suggest that these populations have worse outcomes over  
263 other comorbid conditions when they develop MRSA BSI, and are hence a focus in  
264 future interventions. Finally, a higher proportion of males had MRSA BSI in our study,  
265 consistent with prior studies.<sup>30,31</sup>

266 Of interest was the increase in BSIs due to the USA500 in persons with HIV  
267 (PWH), a finding echoed in recent abstracts.<sup>32,33</sup> This suggests that the types of MRSA  
268 infecting PWH may be shifting away from the historical USA300.<sup>6</sup> As USA500 is  
269 considered a healthcare clone,<sup>6,11,12</sup> this may reflect the changing epidemiology and  
270 management of HIV as it becomes a more chronic condition.

271 We describe increased CC8 in PIV-related BSIs, which was also significant in the  
272 HO-MRSA stratum. Source determination was based on the documentation of  
273 thrombophlebitis in all cases, as described in detail by ID consultants. We did not label  
274 the PIV as source unless it was clearly stated by ID clinicians to be the actual source,  
275 and ensured these infections were not incorrectly categorized as other types of skin  
276 infections. PIV placement is an aseptic but not a sterile procedure, and more emphasis  
277 and attention is placed on maintenance of central venous catheters than on PIVs.  
278 Although the incidence of PIV-related BSIs is low, the high frequency of PIV use results  
279 in a significant portion of PIVs resulting in BSIs.<sup>34</sup> BSIs derive from colonizing flora,<sup>35</sup>  
280 and the CC8 (USA300 in particular) is associated with skin colonization,<sup>36</sup> which is  
281 supported in our data by the increase in CC8 in the setting of SSTIs. For the PIV  
282 infections and CC8 association in the HO-MRSA stratum, the most likely explanation is  
283 that patients are already colonized with CC8 and subsequently become infected with  
284 their isolate after PIV-related complications.<sup>37</sup> This work further builds upon community  
285 origins of HO-MRSA BSIs by adding the association of CC8 with PIVs among patients  
286 with HO-MRSA.<sup>38</sup> A larger sample size and access to colonizing isolates would assist  
287 in expansion of this concept, highlight under-recognized HAIs,<sup>30</sup> and assist in evaluating  
288 the role of patient hygiene.

289 This study also examined the challenges of current surveillance definitions to  
290 describe these infections. A striking 88% of all patients had previous healthcare  
291 exposures, and 80% of the strictly CO-MRSA had prior healthcare exposures. An  
292 alternative definition of community-onset healthcare-associated (CO-HCA) for BSIs that  
293 present within three days of hospital admission in patients with frequent healthcare  
294 exposure<sup>4,26</sup> may be more appropriate to report. We also describe that those presenting  
295 with BSIs from the community are a medically complex group with poor outcomes,  
296 consistent with studies associating CO-MRSA with complicated bacteremia.<sup>39</sup>  
297 Furthermore, those infected with the CO-MRSA with CC5 were well advanced in their  
298 disease course, either through delay of presentation to the hospital or through transfers  
299 from other facilities for advanced care (as noted that 52 (39%) of admissions in the CO-  
300 MRSA group were admitted from other facilities). It appears that future descriptions of  
301 these classifications should include the changing epidemiology of the patients and their  
302 complex medical experiences.

303 This study has several limitations. As a retrospective study, it is subject to errors  
304 in chart abstraction. Being a single institution study, findings from the medically complex  
305 population studied may not be generalizable to smaller community hospitals. Our  
306 primary endpoint of mortality may be subject to reporting bias since death occurring  
307 outside the hospital may not have been captured in medical records. Although we  
308 recognize that methicillin-susceptible *S. aureus* (MSSA) also causes significant disease,  
309 we focused on MRSA-BSI due to the focus of our molecular surveillance program.<sup>40</sup>  
310 Similar analyses extending beyond BSIs and including MSSA are critical.

311 In a highly complex patient population, there remain few distinct differences in  
312 the characteristics associated with the two endemic clones. CC8 has become even  
313 more common in the hospital, and it behaves similarly to CC5 by infecting infirm  
314 individuals. There were likewise no significant differences in both morbidity and mortality  
315 outcomes. Our study also highlights shifts in molecular epidemiology, at-risk  
316 populations, and potential areas for prevention such as PIVs in order to forestall this  
317 fatal disease. Integration of these clinical correlates with genomic and other multiscale  
318 analyses will lead to a more complete understanding *S. aureus* pathogenesis.

### 319 *Acknowledgements*

320 *Financial support.* This research was supported in part by the CTSA/NCATS KL2  
321 Program (KL2TR001435, Icahn School of Medicine at Mount Sinai), the New York State  
322 Department of Health Empire Clinical Research Investigator Program (Aberg, Icahn  
323 School of Medicine and Mount Sinai) (DRA), and R01 AI119145 (HvB). The funders  
324 had no role in study design, data collection and interpretation, or the decision to submit  
325 the work for publication.

326 *Potential conflicts of interest.* All authors have submitted the ICMJE Form for Disclosure  
327 of Potential Conflicts of Interest. All authors report no conflicts of interest relevant to this  
328 article.

### 329 *References*

- 330 1. Kallen AJ, Mu Y, Bulens S, et al. Health care-associated invasive MRSA infections,  
331 2005-2008. *JAMA*. 2010;304(6):641-648.
- 332 2. Lowy FD. Staphylococcus aureus infections. *N Engl J Med*. 1998;339(8):520-532.

- 333 3. Chambers HF, Deleo FR. Waves of resistance: Staphylococcus aureus in the  
334 antibiotic era. *Nat Rev Microbiol.* 2009;7(9):629-641.
- 335 4. Klevens RM, Morrison MA, Nadle J, et al. Invasive methicillin-resistant  
336 Staphylococcus aureus infections in the United States. *JAMA.* 2007;298(15):1763-  
337 1771.
- 338 5. McHugh CG, Riley LW. Risk factors and costs associated with methicillin-resistant  
339 Staphylococcus aureus bloodstream infections. *Infect Control Hosp Epidemiol.*  
340 2004;25(5):425-430.
- 341 6. Seybold U, Kourbatova EV. Emergence of community-associated methicillin-  
342 resistant Staphylococcus aureus USA300 genotype as a major cause of health  
343 care—associated blood stream .... *Clin Infect Dis.* 2006.  
344 <http://cid.oxfordjournals.org/content/42/5/647.short>.
- 345 7. Centers for Disease Control and Prevention (CDC). Four pediatric deaths from  
346 community-acquired methicillin-resistant Staphylococcus aureus — Minnesota and  
347 North Dakota, 1997-1999. *MMWR Morb Mortal Wkly Rep.* 1999;48(32):707-710.
- 348 8. Fridkin SK, Hageman JC, Morrison M, et al. Methicillin-resistant Staphylococcus  
349 aureus disease in three communities. *N Engl J Med.* 2005;352(14):1436-1444.
- 350 9. Rhee Y, Aroutcheva A, Hota B, Weinstein RA, Popovich KJ. Evolving Epidemiology  
351 of Staphylococcus aureus Bacteremia. *Infect Control Hosp Epidemiol.*  
352 2015;36(12):1417-1422.



- 353 10. Center for Disease Control and Prevention. Multidrug-Resistant Organism &  
354 Clostridioides difficile Infection (MDRO/CDI) Module. 2018.
- 355 11. Frisch MB, Castillo-Ramírez S, Petit RA 3rd, et al. Invasive Methicillin-Resistant  
356 Staphylococcus aureus USA500 Strains from the U.S. Emerging Infections  
357 Program Constitute Three Geographically Distinct Lineages. *mSphere*. 2018;3(3).  
358 doi:10.1128/mSphere.00571-17
- 359 12. Benson MA, Ohneck EA, Ryan C, et al. Evolution of hypervirulence by a MRSA  
360 clone through acquisition of a transposable element. *Mol Microbiol*. 2014;93(4):664-  
361 681.
- 362 13. Jolley KA, Maiden MCJ. BIGSdb: Scalable analysis of bacterial genome variation at  
363 the population level. *BMC Bioinformatics*. 2010;11:595.
- 364 14. Camacho C, Coulouris G, Avagyan V, et al. BLAST+: architecture and applications.  
365 *BMC Bioinformatics*. 2009;10:421.
- 366 15. Zhou Z, Alikhan N-F, Sergeant MJ, et al. GrapeTree: visualization of core genomic  
367 relationships among 100,000 bacterial pathogens. *Genome Res*. 2018;28(9):1395-  
368 1404.
- 369 16. Harris PA, Taylor R, Thielke R, Payne J, Gonzalez N, Conde JG. Research  
370 electronic data capture (REDCap)--a metadata-driven methodology and workflow  
371 process for providing translational research informatics support. *J Biomed Inform*.  
372 2009;42(2):377-381.

- 373 17. McGregor JC, Kim PW, Perencevich EN, et al. Utility of the Chronic Disease Score  
374 and Charlson Comorbidity Index as comorbidity measures for use in epidemiologic  
375 studies of antibiotic-resistant organisms. *Am J Epidemiol.* 2005;161(5):483-493.
- 376 18. ESRI (2011) ArcGIS Desktop Release 10. Environmental Systems Research  
377 Institute, Redlands. - References - Scientific Research Publishing.  
378 [https://www.scirp.org/\(S\(czeh2tfqyw2orz553k1w0r45\)\)/reference/ReferencesPapers.aspx?ReferenceID=1102852](https://www.scirp.org/(S(czeh2tfqyw2orz553k1w0r45))/reference/ReferencesPapers.aspx?ReferenceID=1102852). Accessed March 14, 2019.
- 380 19. SAS Institute. *Base SAS 9.4 Procedures Guide: Statistical Procedures, Second*  
381 *Edition.*; 2013.
- 382 20. Gentleman R, Ihaka R, Bates D, Chambers J, Dalgaard J, Hornik K. The R project  
383 for statistical computing. URL: <http://www.r-project.org/254>. 2009.
- 384 21. Boyle-Vavra S, Li X, Alam MT, et al. USA300 and USA500 clonal lineages of  
385 *Staphylococcus aureus* do not produce a capsular polysaccharide due to  
386 conserved mutations in the *cap5* locus. *MBio.* 2015;6(2). doi:10.1128/mBio.02585-  
387 14
- 388 22. Roberts RB, de Lencastre A, Eisner W, et al. Molecular epidemiology of methicillin-  
389 resistant *Staphylococcus aureus* in 12 New York hospitals. *J Infect Dis.*  
390 1998;178(1):164-171.
- 391 23. Pardos de la Gandara M, Curry M, Berger J, et al. MRSA Causing Infections in  
392 Hospitals in Greater Metropolitan New York: Major Shift in the Dominant Clonal  
393 Type between 1996 and 2014. *PLoS One.* 2016;11(6):e0156924.

- 394 24. Popovich KJ, Weinstein RA, Hota B. Are community-associated methicillin-resistant  
395 *Staphylococcus aureus* (MRSA) strains replacing traditional nosocomial MRSA  
396 strains? *Clin Infect Dis*. 2008;46(6):787-794.
- 397 25. Johnson LB, Bhan A, Pawlak J, Manzor O, Saravolatz LD. Changing epidemiology  
398 of community-onset methicillin-resistant *Staphylococcus aureus* bacteremia. *Infect*  
399 *Control Hosp Epidemiol*. 2003;24(6):431-435.
- 400 26. Kempker RR, Farley MM, Ladson JL, Satola S, Ray SM. Association of methicillin-  
401 resistant *Staphylococcus aureus* (MRSA) USA300 genotype with mortality in MRSA  
402 bacteremia. *J Infect*. 2010;61(5):372-381.
- 403 27. Thurlow LR, Joshi GS, Richardson AR. Virulence strategies of the dominant  
404 USA300 lineage of community-associated methicillin-resistant *Staphylococcus*  
405 *aureus* (CA-MRSA). *FEMS Immunol Med Microbiol*. 2012;65(1):5-22.
- 406 28. Recker M, Laabei M, Toleman MS, et al. Clonal differences in *Staphylococcus*  
407 *aureus* bacteraemia-associated mortality. *Nat Microbiol*. 2017;2(10):1381-1388.
- 408 29. Rose HR, Holzman RS, Altman DR, et al. Cytotoxic Virulence Predicts Mortality in  
409 Nosocomial Pneumonia Due to Methicillin-Resistant *Staphylococcus aureus*. *J*  
410 *Infect Dis*. 2015;211(12):1862-1874.
- 411 30. Blauw M, Foxman B, Wu J, Rey J, Kothari N, Malani AN. Risk factors and  
412 outcomes associated with hospital-onset peripheral intravenous catheter-  
413 associated *Staphylococcus aureus* bacteremia. *Open Forum Infect Dis*. February  
414 2019. doi:10.1093/ofid/ofz111

- 415 31. Humphreys H, Fitzpatrick F, Harvey BJ. Gender differences in rates of carriage and  
416 bloodstream infection caused by methicillin-resistant *Staphylococcus aureus*: are  
417 they real, do they matter and why? *Clin Infect Dis*. 2015;61(11):1708-1714.
- 418 32. Popovich KJ, Snitkin ES, Green SJ, et al. 1247. Genomic Epidemiology of MRSA  
419 DURING Incarceration at a Large Inner-City Jail. *Open Forum Infect Dis*.  
420 2018;5(suppl\_1):S379-S379.
- 421 33. Melendez AG. USA500 Methicillin-Resistant *Staphylococcus aureus*: An Evaluation  
422 of Clinical Virulence in Bacteremia. Farley MM, ed. 2014.
- 423 34. Mermel LA. Short-term Peripheral Venous Catheter-Related Bloodstream  
424 Infections: A Systematic Review. *Clin Infect Dis*. 2017;65(10):1757-1762.
- 425 35. Von Eiff C, Becker K, Machka K, Stammer H, Peters G. Nasal carriage as a source  
426 of *Staphylococcus aureus* bacteremia. *N Engl J Med*. 2001;344(1):11-16.
- 427 36. DeLeo FR, Otto M, Kreiswirth BN, Chambers HF. Community-associated methicillin-  
428 resistant *Staphylococcus aureus*. *Lancet*. 2010;375(9725):1557-1568.
- 429 37. Davis KA, Stewart JJ, Crouch HK, Florez CE, Hospenthal DR. Methicillin-resistant  
430 *Staphylococcus aureus* (MRSA) nares colonization at hospital admission and its  
431 effect on subsequent MRSA infection. *Clin Infect Dis*. 2004;39(6):776-782.
- 432 38. Popovich KJ, Snitkin ES, Hota B, et al. Genomic and Epidemiological Evidence for  
433 Community Origins of Hospital-Onset Methicillin-Resistant *Staphylococcus aureus*  
434 Bloodstream Infections. *J Infect Dis*. May 2017. doi:10.1093/infdis/jiw647

- 435 39. Fowler VG Jr, Olsen MK, Corey GR, et al. Clinical identifiers of complicated  
436 Staphylococcus aureus bacteremia. *Arch Intern Med.* 2003;163(17):2066-2072.
- 437 40. Kourtis AP, Hatfield K, Baggs J, et al. Vital Signs: Epidemiology and Recent Trends  
438 in Methicillin-Resistant and in Methicillin-Susceptible Staphylococcus aureus  
439 Bloodstream Infections - United States. *MMWR Morb Mortal Wkly Rep.*  
440 2019;68(9):214-219.

441 *Figure Legends*

442

443 **Figure 1. Core Genome Multilocus Sequence Typing (CG-MLST) of MRSA BSI**  
444 **isolates in study.** Clustering of isolates into CC5 and CC8, as well as USA300 and  
445 USA500 based on cgMLST data. Ridom *spa* types are listed on [the](#) right. The arrows  
446 point to the published NCBI reference genomes for each grouping. “Unknown” refers to  
447 a *spa* type not listed in Ridom database.

Table 1. Demographics and clinical characteristics of patients with MRSA BSIs

| Factor, n (%)                               | MRSA BSI<br>(n = 227) | Factor, n (%)                             | MRSA BSI<br>(n = 227) |
|---------------------------------------------|-----------------------|-------------------------------------------|-----------------------|
| <i>Clonal Complex</i>                       |                       | <i>Comorbidities Continued</i>            |                       |
| CC8                                         | 110 (48)              | Moderate/Severe Liver Disease             | 17 (7)                |
| CC5                                         | 117 (52)              | Metastatic Solid Tumor                    | 14 (6)                |
| <i>Sex</i>                                  |                       | <i>Charlson Comorbidity Index (CCI)</i>   |                       |
| Male                                        | 151 (67)              | 0-3                                       | 71 (31)               |
| Female                                      | 76 (33)               | 4-5                                       | 48 (21)               |
| <i>Race/Ethnicity</i>                       |                       | 6-8                                       | 66 (29)               |
| Non-Hispanic White                          | 98 (43)               | > 8                                       | 42 (19)               |
| Non-Hispanic Black                          | 63 (28)               | <sup>g</sup> History of Transplant        | 32 (14)               |
| Hispanic/Latino                             | 46 (20)               | <sup>h</sup> History of MRSA Colonization | 94 (41)               |
| Asian                                       | 8 (4)                 | <i>Presumed Source of MRSA BSI</i>        |                       |
| Unknown                                     | 12 (5)                | Peripheral Intravenous Catheter           | 16 (7)                |
| <i>Age at Time of Infection</i>             |                       | Skin & Soft Tissue Infection              | 25 (11)               |
| 18-54 Years                                 | 79 (35)               | Pneumonia                                 | 24 (11)               |
| 55-69 Years                                 | 68 (30)               | Diabetic Foot Infection                   | 17 (7)                |
| ≥ 70 Years                                  | 80 (35)               | Vascular Access                           | 78 (34)               |
| History of Injection Drug Use               | 24 (11)               | Septic Arthritis                          | 4 (2)                 |
| HIV                                         | 22 (10)               | Urinary Source                            | 4 (2)                 |
| <i>Admission Source</i>                     |                       | Sacral Wound                              | 11 (5)                |
| <sup>a</sup> Home                           | 132 (58)              | Other/Unknown                             | 28 (12)               |
| NH/Rehab/LTACH                              | 60 (26)               | ICU Admission Prior to BSI                | 42 (19)               |
| Outside Hospital                            | 35 (15)               |                                           |                       |
| <i>Prior Hospital Admission (90 Days)</i>   |                       |                                           |                       |
| <i>Length of Hospital Stay Prior to BSI</i> |                       |                                           |                       |
| ≤ 3 Days                                    | 132 (58)              |                                           |                       |
| > 3 Days                                    | 95 (42)               |                                           |                       |
| <i>Frequent Healthcare Interaction</i>      |                       |                                           |                       |
| Hemodialysis                                | 40 (18)               |                                           |                       |
| <sup>b</sup> Infusion Center                | 34 (15)               |                                           |                       |
| None                                        | 153 (67)              |                                           |                       |
| <sup>c</sup> Presence of Invasive Device    | 180 (79)              |                                           |                       |
| <sup>d</sup> Invasive Procedures            | 109 (48)              |                                           |                       |
| <sup>e</sup> Wound Present                  | 94 (41)               |                                           |                       |
| <i><sup>f</sup>Comorbidities</i>            |                       |                                           |                       |
| Myocardial Infarction                       | 24 (11)               |                                           |                       |
| Congestive Heart Failure                    | 55 (24)               |                                           |                       |
| Peripheral Vascular Disease                 | 37 (16)               |                                           |                       |
| Cerebrovascular Disease                     | 20 (9)                |                                           |                       |
| Dementia                                    | 29 (13)               |                                           |                       |
| Chronic Pulmonary Disease                   | 30 (13)               |                                           |                       |
| Connective Tissue Disease                   | 5 (2)                 |                                           |                       |
| Peptic Ulcer Disease                        | 9 (4)                 |                                           |                       |
| Mild Liver Disease                          | 2 (1)                 |                                           |                       |
| Diabetes (no complications)                 | 38 (17)               |                                           |                       |
| Diabetes with Organ Damage                  | 51 (22)               |                                           |                       |
| Para or Hemiplegia                          | 17 (7)                |                                           |                       |
| Moderate/Severe Renal Disease               | 55 (24)               |                                           |                       |
| Solid Tumor                                 | 23 (10)               |                                           |                       |
| Leukemia                                    | 13 (6)                |                                           |                       |

Abbreviations: LTACH, long-term acute care hospital; HIV, human immunodeficiency virus; BSI, blood stream infection; ICU, intensive care unit

<sup>a</sup> "Admission from home": included non-medical residences such as home, group homes, assisted living facilities, and homeless shelters.

<sup>b</sup> "Infusion center" : outpatient centers for chemotherapy, intravenous fluids, intravenous immunomodulators, and blood products.

<sup>c</sup> "Presence of an invasive device": included pacemaker, implantable cardioverter defibrillator (ICD), left ventricular assist device (LVAD), vascular access (excluding peripheral intravenous catheters), orthopedic hardware, nephrostomy, suprapubic catheter, ileal conduit, foley catheter, arteriovenous graft placement (AVG), percutaneous endoscopic gastrostomy (PEG) tube, or ostomy.

<sup>d</sup> "Invasive procedures": Included any invasive procedures or surgery occurring within one month prior to first positive blood culture for MRSA, excluding electroencephalogram (EEG), electrocardiogram (EKG), and transthoracic echocardiogram (TTE).

<sup>e</sup> "Wound Present": Presence of a chronic skin wound overlying the sacrum, limb, abdomen, or other body part.

<sup>f</sup> "Comorbidities": As defined by the Charleston Comorbidity Index (CCI) refer to standard definitions for CCI.<sup>17</sup>

<sup>g</sup> "History of transplant": Included solid organ and bone marrow transplant.

<sup>h</sup> "History of MRSA colonization": Any positive culture from urine, sputum, tissue, or nares with MRSA prior to the positive MRSA blood culture or a documented history of prior MRSA infection or colonization.

**Table 2. Demographics and clinical characteristics of patients with MRSA BSIs stratified by clonal complex with the odds of being CC8 vs CC5**

| Factor                                      | CC8         |             | CC5                      |                  | Univariate Analysis      |              | Multivariate Analysis |  |
|---------------------------------------------|-------------|-------------|--------------------------|------------------|--------------------------|--------------|-----------------------|--|
|                                             | N = 110 (%) | N = 117 (%) | OR (95% CI)              | p value          | OR (95% CI)              | p value      |                       |  |
| Male                                        | 73 (66)     | 78 (67)     | 0.99 (0.57-1.71)         | 0.96             |                          |              |                       |  |
| <i>Race/Ethnicity</i>                       |             |             |                          |                  |                          |              |                       |  |
| Non-Hispanic White                          | 31 (28)     | 67 (57)     | Reference                |                  | Reference                |              |                       |  |
| Non-Hispanic Black                          | 41 (37)     | 22 (19)     | <b>4.03 (2.06-7.87)</b>  | <b>&lt;0.001</b> | <b>3.45 (1.51-7.87)</b>  | <b>0.003</b> |                       |  |
| Hispanic/Latino                             | 27 (25)     | 19 (16)     | <b>3.07 (1.49-6.34)</b>  | <b>0.002</b>     | <b>3.21(1.33-7.77)</b>   | <b>0.01</b>  |                       |  |
| Asian                                       | 4 (4)       | 4 (3)       | 2.16 (0.51-9.21)         | 0.30             | 3.17 (0.61-16.38)        | 0.17         |                       |  |
| Unknown                                     | 7 (6)       | 5 (4)       | 3.03 (0.89-10.29)        | 0.08             | 2.14 (0.50-9.13)         | 0.30         |                       |  |
| <i>Age at Time of Infection</i>             |             |             |                          |                  |                          |              |                       |  |
| 18-54 Years                                 | 50 (45)     | 29 (25)     | Reference                |                  | Reference                |              |                       |  |
| 55-69 Years                                 | 37 (34)     | 31 (27)     | 0.69 (0.36-1.34)         | 0.28             | 0.64 (0.27-1.50)         | 0.30         |                       |  |
| ≥ 70 Years                                  | 23 (21)     | 57 (49)     | <b>0.23 (0.12-0.46)</b>  | <b>&lt;0.001</b> | <b>0.28 (0.11-0.74)</b>  | <b>0.01</b>  |                       |  |
| History of Injection Drug Use               | 16 (15)     | 8 (6)       | 2.32 (0.95-5.66)         | 0.06             | 0.62 (0.21-1.88)         | 0.40         |                       |  |
| HIV                                         | 18 (16)     | 4 (3)       | <b>5.53 (1.81-16.90)</b> | <b>0.003</b>     | <b>3.62 (1.01-12.92)</b> | <b>0.05</b>  |                       |  |
| <i>Admission Source</i>                     |             |             |                          |                  |                          |              |                       |  |
| Home                                        | 78 (71)     | 54 (46)     | Reference                |                  | Reference                |              |                       |  |
| NH/Rehab/LTACH                              | 23 (21)     | 37 (32)     | <b>0.43 (0.23-0.80)</b>  | <b>0.008</b>     | 0.55 (0.24-1.26)         | 0.16         |                       |  |
| Other Hospital                              | 9 (8)       | 26 (22)     | <b>0.24 (0.10-0.55)</b>  | <b>&lt;0.001</b> | <b>0.33 (0.11-1.00)</b>  | <b>0.05</b>  |                       |  |
| Prior Hospital Admission (90 Days)          | 70 (64)     | 92 (79)     | <b>0.48 (0.26-0.86)</b>  | <b>0.01</b>      | 1.00 (0.43-2.32)         | 0.99         |                       |  |
| <i>Length of Hospital Stay Prior to BSI</i> |             |             |                          |                  |                          |              |                       |  |
| ≤3 Days                                     | 74 (67)     | 58 (50)     | <b>2.09 (1.22-3.58)</b>  | <b>0.007</b>     | 2.01 (0.90-4.50)         | 0.09         |                       |  |
| >3 Days                                     | 36 (33)     | 59 (50)     | Reference                |                  | Reference                |              |                       |  |
| <i>Frequent Healthcare Interaction</i>      |             |             |                          |                  |                          |              |                       |  |
| Hemodialysis                                | 22 (20)     | 18 (15)     | 1.45 (0.72-2.92)         | 0.30             |                          |              |                       |  |
| Infusion Center                             | 18 (16)     | 16 (14)     | 1.33 (0.63-2.81)         | 0.45             |                          |              |                       |  |
| None                                        | 70 (64)     | 83 (71)     | Reference                |                  |                          |              |                       |  |
| Presence of Invasive Device                 | 77 (70)     | 103 (88)    | <b>0.32 (0.16-0.63)</b>  | <b>0.001</b>     | 0.56 (0.24-1.32)         | 0.18         |                       |  |
| Invasive Procedures                         | 44 (40)     | 65 (56)     | <b>0.53 (0.32-0.90)</b>  | <b>0.02</b>      | 0.67 (0.30-1.48)         | 0.32         |                       |  |
| Wound Present                               | 46 (42)     | 48 (41)     | 1.03 (0.61-1.75)         | 0.90             |                          |              |                       |  |
| <i>Charlson Comorbidity Index (CCI)</i>     |             |             |                          |                  |                          |              |                       |  |
| 0-3                                         | 40 (36)     | 31 (27)     | Reference                |                  | Reference                |              |                       |  |
| 4-5                                         | 26 (24)     | 22 (19)     | 0.92 (0.44-1.91)         | 0.82             | 1.34 (0.50-3.57)         | 0.56         |                       |  |
| 6-8                                         | 30 (27)     | 36 (31)     | 0.65 (0.33-1.27)         | 0.20             | 1.09 (0.42-2.85)         | 0.85         |                       |  |
| >8                                          | 14 (13)     | 28 (24)     | <b>0.39 (0.18-0.86)</b>  | <b>0.02</b>      | 0.74 (0.22-2.49)         | 0.63         |                       |  |
| History of Transplant                       | 14 (13)     | 18 (15)     | 0.80 (0.38-1.70)         | 0.57             |                          |              |                       |  |
| History of MRSA Colonization                | 47 (43)     | 47 (40)     | 1.11 (0.66-1.89)         | 0.70             |                          |              |                       |  |
| <i>Presumed Source of MRSA BSI</i>          |             |             |                          |                  |                          |              |                       |  |
| Peripheral Intravenous Catheter             | 11 (10)     | 5 (4)       | 2.49 (0.84-7.41)         | 0.10             | <b>5.96 (1.51-23.50)</b> | <b>0.01</b>  |                       |  |
| Skin & Soft Tissue Infection                | 18 (16)     | 7 (6)       | <b>3.08 (1.23-7.68)</b>  | <b>0.02</b>      | <b>2.21 (0.98-10.46)</b> | <b>0.05</b>  |                       |  |
| Pneumonia                                   | 12 (11)     | 12 (10)     | 1.07 (0.46-2.50)         | 0.87             |                          |              |                       |  |
| Diabetic Foot Infection                     | 8 (7)       | 9 (8)       | 0.94 (0.35-2.53)         | 0.90             |                          |              |                       |  |
| Vascular Access                             | 35 (32)     | 43 (37)     | 0.80 (0.46-1.39)         | 0.43             |                          |              |                       |  |
| Septic Arthritis                            | 1 (1)       | 3 (3)       | 0.35 (0.04-3.40)         | 0.36             |                          |              |                       |  |
| Urinary Source                              | 1 (1)       | 3 (3)       | 0.35 (0.04-3.40)         | 0.36             |                          |              |                       |  |
| Sacral Wound                                | 6 (5)       | 5 (4)       | 1.29 (0.38-4.36)         | 0.68             |                          |              |                       |  |
| Other/Unknown                               | 12 (11)     | 16 (14)     | 0.77 (0.35-1.72)         | 0.53             |                          |              |                       |  |
| ICU Admission Prior to BSI                  | 16 (15)     | 26 (22)     | 0.60 (0.30-1.18)         | 0.14             | 1.47 (0.53-4.07)         | 0.46         |                       |  |

**Bold** = significant at  $\leq 0.05$

Abbreviations: NH, nursing home; rehab, rehabilitation facility; LTACH, long-term acute care hospital; BSI, bloodstream infection; HIV, human immunodeficiency virus; ICU, intensive care unit. See Table 1 for definitions.



**Table 3. Demographics and clinical characteristics of patients with MRSA BSIs stratified by NHSN definitions with the odds of having CO-MRSA vs HO-MRSA**

| Factor                                   | CO-MRSA<br>N = 132 (%) | HO-MRSA<br>N = 95 (%) | Univariate Analysis      |                  | Multivariate Analysis    |                  |
|------------------------------------------|------------------------|-----------------------|--------------------------|------------------|--------------------------|------------------|
|                                          |                        |                       | OR (95% CI)              | p value          | OR (95% CI)              | p value          |
| CC8                                      | 74 (56)                | 36 (38)               | <b>2.09 (1.22-3.58)</b>  | <b>0.007</b>     | <b>2.33 (1.03-5.27)</b>  | <b>0.04</b>      |
| Male                                     | 90 (68)                | 61 (64)               | 1.19 (0.68-2.08)         | 0.53             |                          |                  |
| <i>Race/Ethnicity</i>                    |                        |                       |                          |                  |                          |                  |
| Non-Hispanic White                       | 50 (38)                | 48 (51)               | Reference                |                  | Reference                |                  |
| Non-Hispanic Black                       | 40 (30)                | 23 (24)               | 1.67 (0.87-3.19)         | 0.12             | 1.14 (0.44-3.00)         | 0.79             |
| Hispanic/Latino                          | 30 (23)                | 16 (17)               | 1.80 (0.87-3.72)         | 0.11             | 1.12 (0.36-3.43)         | 0.85             |
| Asian                                    | 6 (5)                  | 2 (2)                 | 2.88 (0.55-14.98)        | 0.21             | 2.67 (0.36-19.62)        | 0.33             |
| Unknown                                  | 6 (5)                  | 6 (6)                 | 0.96 (0.29-3.18)         | 0.95             | 1.08 (0.21-5.47)         | 0.93             |
| <i>Age at Time of Infection</i>          |                        |                       |                          |                  |                          |                  |
| 18-54 Years                              | 43 (33)                | 36 (38)               | Reference                |                  |                          |                  |
| 55-69 Years                              | 44 (33)                | 24 (25)               | 1.54 (0.79-2.99)         | 0.21             |                          |                  |
| ≥ 70 Years                               | 45 (34)                | 35 (37)               | 1.08 (0.58-2.01)         | 0.82             |                          |                  |
| History of Injection Drug Use            | 18 (14)                | 6 (6)                 | 2.34 (0.89-6.15)         | 0.08             | 0.56 (0.15-2.14)         | 0.40             |
| HIV                                      | 13 (10)                | 9 (9)                 | 1.04 (0.43-2.55)         | 0.93             |                          |                  |
| <i>Admission Source</i>                  |                        |                       |                          |                  |                          |                  |
| Home                                     | 80 (61)                | 52 (55)               | Reference                |                  | Reference                |                  |
| NH/Rehab/LTACH                           | 40 (30)                | 20 (21)               | 1.30 (0.69-2.47)         | 0.42             | 0.89 (0.34-2.30)         | 0.81             |
| Other Hospital                           | 12 (9)                 | 23 (24)               | <b>0.34 (0.16-0.74)</b>  | <b>0.007</b>     | 0.78 (0.25-2.46)         | 0.67             |
| Prior Hospital Admission (90 Days)       | 91 (69)                | 71 (75)               | 0.75 (0.42-1.36)         | 0.34             |                          |                  |
| <i>Frequent Healthcare Interaction</i>   |                        |                       |                          |                  |                          |                  |
| Hemodialysis                             | 33 (25)                | 7 (7)                 | <b>3.48 (1.45-8.36)</b>  | <b>0.005</b>     | <b>4.62 (1.23-17.29)</b> | <b>0.02</b>      |
| Infusion Center                          | 11 (8)                 | 23 (24)               | <b>0.35 (0.16-0.78)</b>  | <b>0.01</b>      | 0.35 (0.12-1.07)         | 0.07             |
| None                                     | 88 (67)                | 65 (68)               | Reference                |                  | Reference                |                  |
| Presence of Invasive Device              | 95 (72)                | 85 (89)               | <b>0.30 (0.14-0.64)</b>  | <b>0.002</b>     | 0.54 (0.19-1.55)         | 0.25             |
| Invasive Procedures                      | 37 (28)                | 72 (76)               | <b>0.12 (0.07-0.23)</b>  | <b>&lt;0.001</b> | <b>0.18 (0.08-0.40)</b>  | <b>&lt;0.001</b> |
| Wound Present                            | 58 (44)                | 36 (38)               | 1.29 (0.75-2.20)         | 0.36             |                          |                  |
| <i>Charlson Comorbidity Index (CCI)</i>  |                        |                       |                          |                  |                          |                  |
| 0-3                                      | 38 (29)                | 33 (35)               | Reference                |                  | Reference                |                  |
| 4-5                                      | 24 (18)                | 24 (25)               | 0.87 (0.42-1.81)         | 0.71             | 1.48 (0.51-4.23)         | 0.47             |
| 6-8                                      | 40 (30)                | 26 (27)               | 1.34 (0.68-2.64)         | 0.40             | 1.08 (0.40-2.92)         | 0.88             |
| >8                                       | 30 (23)                | 12 (13)               | 2.17 (0.96-4.91)         | 0.06             | 2.13 (0.62-7.25)         | 0.23             |
| History of Transplant                    | 13 (10)                | 19 (20)               | <b>0.44 (0.20-0.94)</b>  | <b>0.03</b>      | 1.11 (0.38-3.23)         | 0.85             |
| History of MRSA Colonization             | 58 (44)                | 36 (38)               | 1.29 (0.75-2.20)         | 0.36             |                          |                  |
| <i>Presumed Source of MRSA Infection</i> |                        |                       |                          |                  |                          |                  |
| Peripheral Intravenous Catheter          | 6 (5)                  | 10 (11)               | 0.41 (0.14-1.16)         | 0.09             | <b>0.11 (0.03-0.46)</b>  | <b>0.002</b>     |
| Skin & Soft Tissue Infection             | 17 (13)                | 8 (8)                 | 1.61 (0.66-3.90)         | 0.29             |                          |                  |
| Pneumonia                                | 14 (11)                | 10 (11)               | 1.01 (0.43-2.38)         | 0.98             |                          |                  |
| Diabetic Foot Infection                  | 15 (11)                | 2 (2)                 | <b>5.96 (1.33-26.73)</b> | <b>0.02</b>      | 2.04 (0.33-12.45)        | 0.44             |
| Vascular Access                          | 36 (27)                | 42 (44)               | <b>0.47 (0.27-0.83)</b>  | <b>0.009</b>     | <b>0.36 (0.13-0.95)</b>  | <b>0.04</b>      |
| Septic Arthritis                         | 2 (2)                  | 2 (2)                 | 0.72 (0.10-5.17)         | 0.74             |                          |                  |
| Urinary Source                           | 3 (2)                  | 1 (1)                 | 2.18 (0.22-21.30)        | 0.50             |                          |                  |
| Sacral Wound                             | 9 (7)                  | 2 (2)                 | 3.40 (0.72-16.12)        | 0.12             | 0.70 (0.11-4.55)         | 0.71             |
| Other/Unknown                            | 16 (12)                | 12 (13)               | 0.95 (0.43-2.12)         | 0.91             |                          |                  |
| ICU Admission Prior to BSI               | 5 (4)                  | 37 (39)               | <b>0.06 (0.02-0.17)</b>  | <b>&lt;0.001</b> | <b>0.13 (0.04-0.43)</b>  | <b>&lt;0.001</b> |

**Bold** = significant at  $\leq 0.05$

Abbreviations: NH, nursing home; rehab, rehabilitation facility; LTACH, long-term acute care hospital; BSI, bloodstream infection; HIV, human immunodeficiency virus; ICU, intensive care unit; NHSN, National Healthcare Safety Network. See Table 1 for definitions.



Figure 1. Core Genome Multilocus Sequence Typing (CG-MLST) of MRSA BSI isolates in study

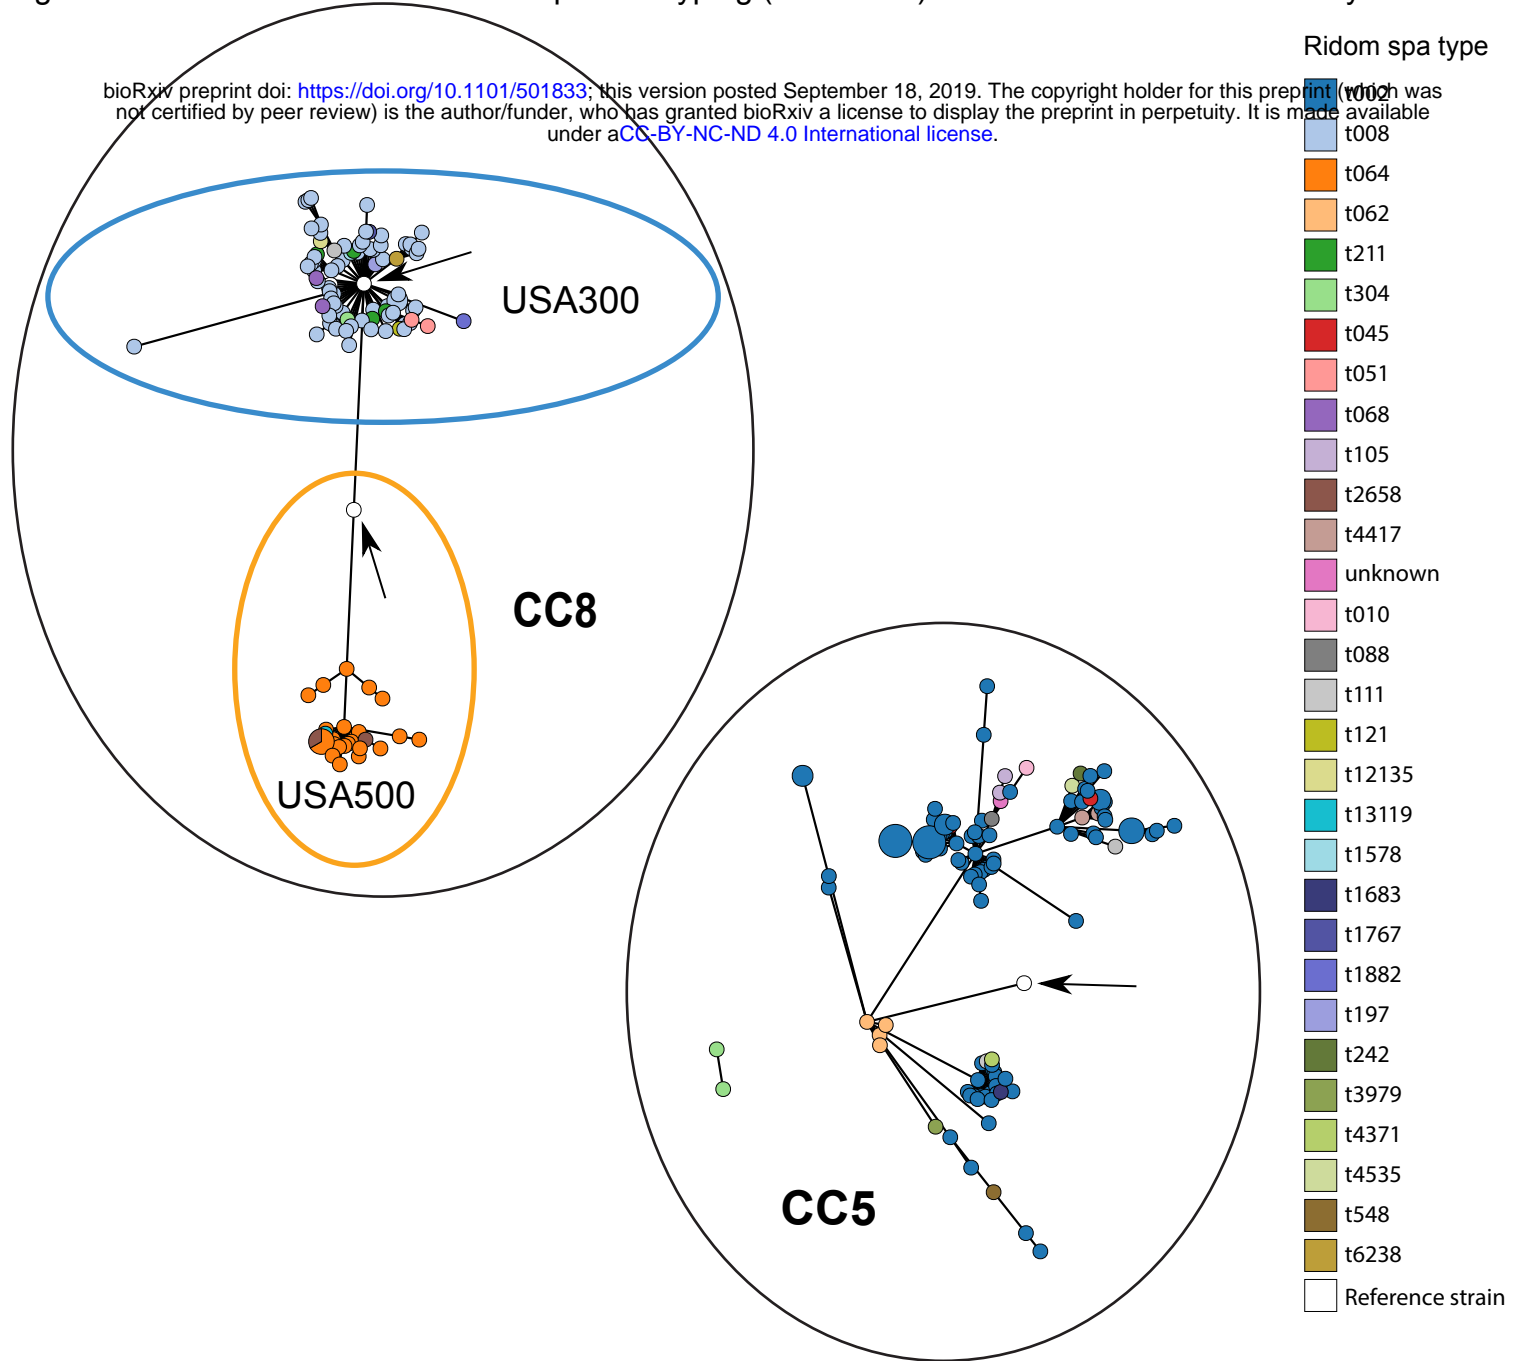

Figure 2. Multivariate analysis of death related to MRSA BS within 90 days

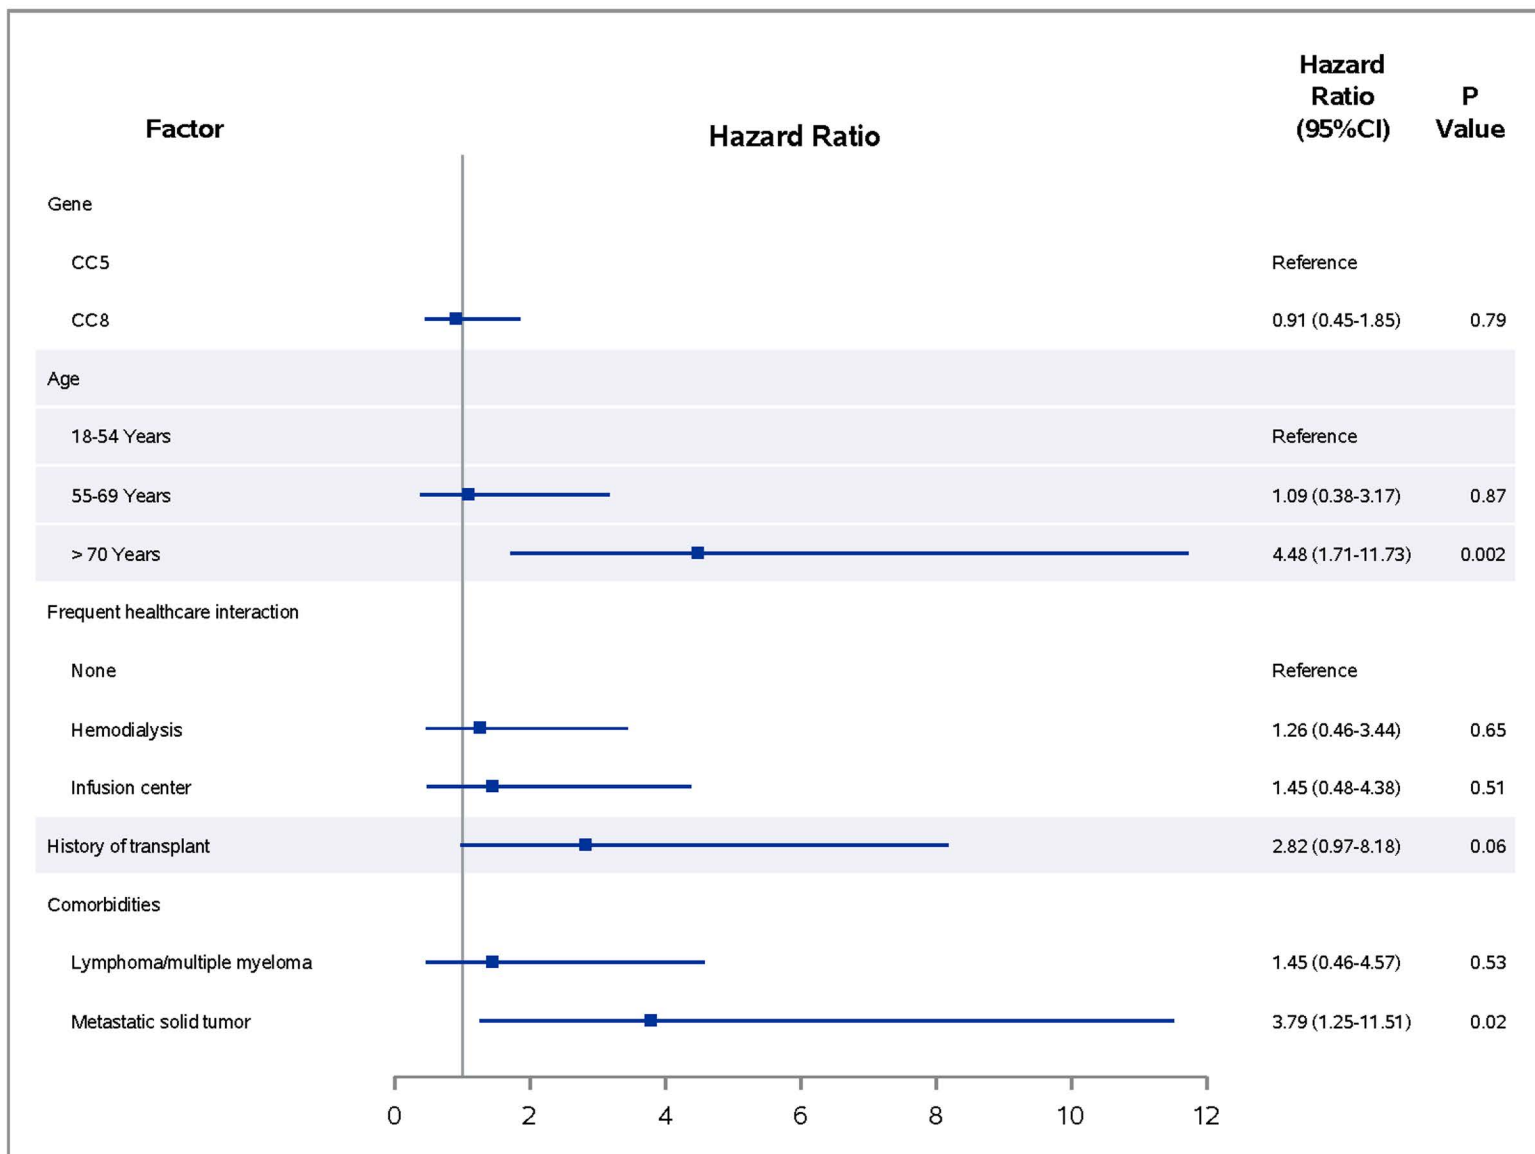

Source: https://www.biorxiv.org/content/10.1101/501833v3.full.pdf
