# Supplementary material for: Blurred molecular epidemiological lines between the two dominant methicillin-resistant Staphylococcus aureus clones
Source: bioRxiv or medRxiv preprint supplement (doi:10.1101/501833), 2019-09-18
Supplement: Supplementary file [file media-1.pdf]

**Supplementary Table 1. Definitions of Variables**

| <b>Variable</b>               | <b>Definition</b>                                                                                                                                                                                                                                                                                                                         |
|-------------------------------|-------------------------------------------------------------------------------------------------------------------------------------------------------------------------------------------------------------------------------------------------------------------------------------------------------------------------------------------|
| Admission from home           | Includes non-medical residences (home, group homes, assisted living facilities, and homeless shelters)                                                                                                                                                                                                                                    |
| Infusion Center               | Includes centers where receive chemotherapy, intravenous fluids, intravenous immunomodulators, and blood products.                                                                                                                                                                                                                        |
| Presence of invasive device   | Includes pacemaker, implantable cardioverter defibrillator (ICD), left ventricular assist device (LVAD), vascular access (excluding peripheral IV), orthopedic hardware, nephrostomy, suprapubic catheter, ileal conduit, foley catheter, arteriovenous graft placement (AVG), percutaneous endoscopic gastrostomy (PEG) tube, or ostomy. |
| Invasive Procedures           | Includes any invasive procedures or surgery occurring within one month prior to first positive blood culture for MRSA, excluding electroencephalogram (EEG), electrocardiogram (EKG), and transthoracic echocardiogram (TTE).                                                                                                             |
| Wound Present                 | Chronic skin wound (i.e. overlying sacrum, limb, abdomen, or other body part).                                                                                                                                                                                                                                                            |
| History of MRSA Colonization  | Any positive culture from urine, sputum, tissue, or nares with MRSA prior to positive MRSA blood culture or a documented history of prior MRSA infection or colonization.                                                                                                                                                                 |
| Recurrence of MRSA bacteremia | Positive MRSA blood culture over 30 days after the last positive MRSA blood culture.                                                                                                                                                                                                                                                      |
| Intubation                    | Excluding patients who were perioperative that are intubated less than 4 days.                                                                                                                                                                                                                                                            |
| HIV                           | Positive HIV antibody test                                                                                                                                                                                                                                                                                                                |
| Comorbidities in the CCI      | Refer to standard definitions for CCI. <sup>18</sup> Note that for CCI AIDS we used CD4+ T cell count < 200 cells/mm <sup>3</sup> on index admission.                                                                                                                                                                                     |
| History of Transplant         | Includes solid organ and bone marrow transplant                                                                                                                                                                                                                                                                                           |
| Metastatic infection          | Evidence of bacterial seeding to other body sites after initial blood stream infection (i.e. endocarditis, spinal infection, septic pulmonary emboli).                                                                                                                                                                                    |

**Supplementary Table 2.** REDCap ID Number and Clone of Patients

| REDCap ID | Clonal Complex | MLST | Spa Type | PVL |
|-----------|----------------|------|----------|-----|
| 1         | CC5            | 105  | t002     | -/- |
| 2         | CC5            | 105  | t002     | -/- |
| 3         | CC5            | 105  | t002     | -/- |
| 4         | CC5            | 105  | t002     | -/- |
| 5         | CC5            | 105  | t002     | -/- |
| 6         | CC5            | 105  | t002     | -/- |
| 7         | CC5            | 105  | t002     | -/- |
| 8         | CC5            | 105  | t002     | -/- |
| 9         | CC5            | 105  | t002     | -/- |
| 10        | CC5            | 105  | t002     | -/- |
| 11        | CC5            | 5    | t002     | -/- |
| 12        | CC8            | 8    | t008     | +/+ |
| 13        | CC5            | 105  | t002     | -/- |
| 14        | CC5            | 5    | t002     | -/- |
| 15        | CC5            | 105  | t002     | -/- |
| 16        | CC5            | 105  | t002     | -/- |
| 17        | CC5            | 105  | t002     | -/- |
| 18        | CC8            | 8    | t064     | -/- |
| 19        | CC5            | 105  | t002     | -/- |
| 20        | CC5            | 105  | t002     | -/- |
| 21        | CC8            | 8    | t2658    | -/- |
| 22        | CC8            | 8    | t064     | -/- |
| 23        | CC5            | 5    | t002     | -/- |
| 25        | CC8            | 8    | t008     | -/- |
| 26        | CC5            | 5    | t002     | -/- |
| 27        | CC8            | 8    | t008     | +/+ |
| 28        | CC5            | 105  | t002     | -/- |
| 29        | CC8            | 8    | t008     | +/+ |
| 30        | CC5            | 105  | t002     | -/- |
| 32        | CC5            | 105  | t002     | -/- |
| 33        | CC5            | 105  | t002     | -/- |
| 34        | CC5            | 5    | t002     | -/- |
| 35        | CC8            | 8    | t064     | -/- |
| 36        | CC5            | 105  | t002     | -/- |
| 37        | CC5            | 105  | t088     | -/- |
| 38        | CC5            | 105  | t002     | -/- |
| 39        | CC5            | 105  | t002     | -/- |
| 40        | CC8            | 8    | t008     | +/+ |
| 41        | CC8            | 8    | t008     | +/+ |
| 42        | CC5            | 5    | t002     | -/- |
| 43        | CC5            | 105  | t002     | -/- |
| 44        | CC5            | 5    | t002     | -/- |
| 45        | CC8            | 8    | t13119   | -/- |
| 47        | CC5            | 496  | t002     | -/- |
| 48        | CC5            | 496  | t002     | -/- |

| REDCap ID | Clonal Complex | MLST | Spa Type | PVL |
|-----------|----------------|------|----------|-----|
| 49        | CC5            | 105  | t002     | -/- |
| 50        | CC8            | 8    | t008     | -/+ |
| 51        | CC5            | 105  | t002     | -/- |
| 52        | CC5            | 105  | t002     | -/- |
| 53        | CC8            | 8    | t008     | +/+ |
| 54        | CC8            | 8    | t304     | +/+ |
| 56        | CC8            | 8    | t008     | -/- |
| 57        | CC8            | 8    | t008     | +/+ |
| 58        | CC5            | 5    | t002     | -/- |
| 59        | CC8            | 8    | t008     | +/+ |
| 60        | CC5            | 5    | t062     | -/- |
| 61        | CC5            | 5    | t002     | -/- |
| 63        | CC8            | 8    | t121     | +/+ |
| 64        | CC8            | 8    | t008     | +/+ |
| 65        | CC8            | 8    | t008     | +/+ |
| 66        | CC8            | 8    | t064     | -/- |
| 67        | CC8            | 8    | t211     | +/+ |
| 68        | CC5            | 105  | t105     | -/- |
| 69        | CC8            | 8    | t211     | +/+ |
| 70        | CC8            | 8    | t008     | +/+ |
| 71        | CC8            | 8    | t068     | +/+ |
| 73        | CC8            | 8    | t008     | +/+ |
| 74        | CC5            | 105  | t002     | -/- |
| 75        | CC5            | 5    | t002     | -/- |
| 76        | CC8            | 8    | t008     | +/+ |
| 77        | CC8            | 8    | t008     | +/+ |
| 79        | CC8            | 8    | t008     | +/+ |
| 80        | CC8            | 8    | t008     | +/+ |
| 81        | CC5            | 5    | t062     | -/- |
| 83        | CC5            | 5    | t002     | -/- |
| 84        | CC5            | 105  | t002     | -/- |
| 85        | CC5            | 5    | t002     | -/- |
| 86        | CC5            | 5    | t002     | -/- |
| 87        | CC8            | 8    | t064     | -/- |
| 88        | CC5            | 225  | t668     | -/- |
| 89        | CC8            | 8    | t064     | -/- |
| 90        | CC8            | 8    | t008     | +/+ |
| 91        | CC5            | 105  | t002     | -/- |
| 92        | CC8            | 8    | t197     | +/+ |
| 94        | CC5            | 5    | t002     | -/- |
| 95        | CC8            | 8    | t008     | +/+ |
| 96        | CC5            | 105  | t4535    | -/- |
| 97        | CC8            | 8    | t008     | +/+ |
| 98        | CC8            | 8    | t008     | +/+ |
| 99        | CC8            | 8    | t12135   | +/+ |
| 100       | CC5            | 105  | t002     | -/- |
| 101       | CC8            | 8    | t008     | +/+ |

| REDCap ID | Clonal Complex | MLST | Spa Type | PVL |
|-----------|----------------|------|----------|-----|
| 102       | CC5            | 105  | t002     | -/- |
| 103       | CC8            | 8    | t008     | +/+ |
| 104       | CC8            | 8    | t008     | +/+ |
| 105       | CC8            | 8    | t064     | -/- |
| 107       | CC5            | 5    | t002     | -/- |
| 108       | CC8            | 8    | t008     | +/+ |
| 109       | CC8            | 8    | t008     | -/+ |
| 110       | CC5            | 105  | t002     | -/- |
| 111       | CC8            | 8    | t008     | +/+ |
| 112       | CC8            | 8    | t064     | -/- |
| 113       | CC5            | 5    | t002     | +/+ |
| 114       | CC8            | 8    | t008     | +/+ |
| 115       | CC8            | 8    | t064     | -/- |
| 116       | CC5            | 105  | t002     | -/- |
| 117       | CC8            | 8    | t008     | +/+ |
| 119       | CC5            | 5    | t002     | -/- |
| 120       | CC5            | 5    | t242     | -/- |
| 121       | CC8            | 8    | t008     | +/- |
| 122       | CC5            | 5    | t002     | -/- |
| 123       | CC5            | 3390 | t002     | -/- |
| 124       | CC5            | 231  | t002     | -/- |
| 125       | CC8            | 8    | t008     | -/- |
| 127       | CC8            | 8    | t008     | +/+ |
| 128       | CC8            | 8    | t064     | -/- |
| 129       | CC8            | 8    | t064     | -/- |
| 130       | CC5            | 105  | t002     | -/- |
| 131       | CC8            | 8    | t008     | +/+ |
| 132       | CC8            | 8    | t008     | -/- |
| 134       | CC5            | 5    | t002     | -/- |
| 135       | CC5            | 105  | t002     | -/- |
| 136       | CC8            | 8    | t1767    | +/+ |
| 137       | CC5            | 5    | t002     | -/- |
| 138       | CC8            | 8    | t1882    | +/+ |
| 139       | CC8            | 8    | t051     | +/- |
| 140       | CC8            | 8    | t008     | +/+ |
| 141       | CC8            | 8    | t064     | -/- |
| 142       | CC5            | 5    | t002     | -/- |
| 143       | CC8            | 8    | t955     | -/- |
| 144       | CC5            | 5    | t002     | -/- |
| 145       | CC8            | 8    | t064     | -/- |
| 146       | CC5            | 5    | t002     | -/- |
| 147       | CC8            | 8    | t064     | -/- |
| 148       | CC5            | 5    | t3979    | -/- |
| 149       | CC8            | 8    | t008     | +/+ |
| 150       | CC8            | 8    | t6238    | +/+ |
| 152       | CC5            | 5    | t4371    | -/- |
| 154       | CC5            | 5    | t002     | -/- |

| REDCap ID | Clonal Complex | MLST | Spa Type | PVL |
|-----------|----------------|------|----------|-----|
| 155       | CC8            | 8    | t051     | +/- |
| 156       | CC5            | 105  | t002     | -/- |
| 157       | CC8            | 8    | t008     | +/+ |
| 159       | CC5            | 105  | t002     | -/- |
| 160       | CC8            | 8    | t1578    | +/+ |
| 161       | CC5            | 105  | t4417    | -/- |
| 162       | CC5            | 5    | t045     | -/- |
| 163       | CC5            | 105  | t105     | -/- |
| 164       | CC8            | 8    | t064     | -/- |
| 165       | CC5            | 231  | t002     | -/- |
| 166       | CC8            | 8    | t064     | -/- |
| 168       | CC8            | 8    | t008     | +/+ |
| 169       | CC8            | 8    | t008     | +/+ |
| 170       | CC8            | 6    | t304     | -/- |
| 171       | CC5            | 5    | t002     | -/- |
| 172       | CC5            | 5    | t002     | -/- |
| 173       | CC5            | 5    | t002     | -/- |
| 175       | CC8            | 8    | t008     | +/+ |
| 176       | CC8            | 8    | t681     | +/+ |
| 179       | CC8            | 8    | t064     | -/- |
| 180       | CC5            | 105  | t002     | -/- |
| 181       | CC8            | 8    | t064     | -/- |
| 182       | CC8            | 8    | t008     | +/+ |
| 183       | CC5            | 5    | t1683    | -/- |
| 184       | CC5            | 5    | t062     | -/- |
| 185       | CC5            | 5    | t002     | -/- |
| 188       | CC8            | 8    | t211     | +/+ |
| 189       | CC8            | 8    | t068     | +/+ |
| 190       | CC5            | 5    | t002     | -/- |
| 191       | CC8            | 8    | t008     | -/- |
| 192       | CC8            | 8    | t008     | +/+ |
| 193       | CC8            | 8    | t211     | +/+ |
| 194       | CC5            | 105  | t002     | -/- |
| 195       | CC5            | 5    | t002     | -/- |
| 196       | CC5            | 105  | t002     | -/- |
| 197       | CC8            | 8    | t008     | +/+ |
| 198       | CC8            | 8    | t064     | -/- |
| 199       | CC8            | 8    | t008     | +/+ |
| 200       | CC5            | 3390 | t010     | -/- |
| 201       | CC5            | 5    | t002     | -/- |
| 202       | CC8            | 8    | t008     | +/+ |
| 203       | CC8            | 8    | t008     | -/- |
| 205       | CC8            | 8    | t008     | -/- |
| 206       | CC5            | 5    | t002     | -/- |
| 207       | CC8            | 8    | t008     | +/+ |
| 208       | CC8            | 8    | t064     | -/- |
| 209       | CC8            | 8    | t2658    | -/- |

| REDCap ID | Clonal Complex | MLST | Spa Type | PVL |
|-----------|----------------|------|----------|-----|
| 211       | CC5            | 105  | t045     | -/- |
| 212       | CC8            | 6    | t304     | -/- |
| 213       | CC8            | 8    | t008     | +/- |
| 214       | CC5            | 105  | t002     | -/- |
| 215       | CC8            | 8    | t008     | +/+ |
| 216       | CC5            | 105  | t4417    | -/- |
| 217       | CC5            | 5    | t548     | -/- |
| 218       | CC8            | 8    | t008     | +/+ |
| 219       | CC5            | 105  | t002     | -/- |
| 220       | CC5            | 105  | t002     | -/- |
| 221       | CC5            | 105  | t002     | -/- |
| 222       | CC5            | 5    | t002     | -/- |
| 223       | CC5            | 5    | t002     | -/- |
| 224       | CC5            | 5    | t002     | -/- |
| 225       | CC8            | 8    | t064     | -/- |
| 226       | CC8            | 8    | t064     | -/- |
| 227       | CC8            | 8    | t008     | +/+ |
| 228       | CC5            | 105  | t002     | -/- |
| 229       | CC8            | 8    | t008     | +/+ |
| 230       | CC5            | 5    | t111     | -/- |
| 231       | CC5            | 105  | t002     | -/- |
| 232       | CC5            | 5    | t062     | -/- |
| 233       | CC8            | 8    | t064     | -/- |
| 234       | CC8            | 8    | t008     | +/+ |
| 235       | CC8            | 8    | t008     | +/+ |
| 236       | CC5            | 105  | t002     | -/- |
| 237       | CC5            | 105  | t002     | -/- |
| 238       | CC5            | 5    | t002     | -/- |
| 239       | CC5            | 105  | t002     | -/- |
| 240       | CC8            | 8    | t064     | -/- |
| 241       | CC5            | 105  | t002     | -/- |
| 242       | CC8            | 8    | t008     | +/+ |
| 243       | CC5            | 105  | t002     | -/- |
| 244       | CC5            | 5    | t002     | -/- |
| 246       | CC5            | 105  | t002     | -/- |
| 247       | CC8            | 8    | t008     | -/- |
| 248       | CC8            | 8    | t008     | +/+ |
| 250       | CC5            | 5    | t002     | -/- |
| 252       | CC8            | 8    | t008     | +/+ |
| 393       | CC5            | 105  | t002     | -/- |
| 395       | CC8            | 8    | t008     | +/+ |

**Supplementary Table 3. Demographic and Clinical Characteristics of MRSA BSIs in Patients Stratified by Spa Type with the Odds of Being USA500 vs USA300**

| Factor                                      | USA500<br>N = 27 (%) | USA300<br>N = 83 (%) | Univariate Analysis      |             | Multivariate Analysis    |             |
|---------------------------------------------|----------------------|----------------------|--------------------------|-------------|--------------------------|-------------|
|                                             |                      |                      | OR (95% CI)              | p value     | OR (95% CI)              | p value     |
| Male                                        | 16 (59)              | 57 (69)              | 0.66 (0.27-1.63)         | 0.37        |                          |             |
| <i>Race/Ethnicity</i>                       |                      |                      |                          |             |                          |             |
| Non-Hispanic White                          | 5 (19)               | 26 (31)              | Reference                |             | Reference                |             |
| Non-Hispanic Black                          | 11 (41)              | 30 (36)              | 1.89 (0.52-7.89)         | 0.43        | 1.11 (0.27-4.67)         | 0.88        |
| Hispanic/Latino                             | 9 (33)               | 18 (22)              | 2.56 (0.64-11.44)        | 0.22        | 2.62 (0.57-12.06)        | 0.22        |
| Asian                                       | 2 (7)                | 2 (2)                | 4.87 (0.29-82.71)        | 0.34        | 3.26 (0.31-34.31)        | 0.33        |
| Unknown                                     | 0 (0)                | 7 (8)                | 0.60 (0.00-3.74)         | 0.34        | <0.001 (<0.001->999.99)  | 0.97        |
| <i>Age at Time of Infection</i>             |                      |                      |                          |             |                          |             |
| 18-54 Years                                 | 12 (44)              | 38 (46)              | Reference                |             |                          |             |
| 55-69 Years                                 | 11 (41)              | 26 (31)              | 1.34 (0.46-3.89)         | 0.72        |                          |             |
| ≥70 Years                                   | 4 (15)               | 19 (23)              | 0.67 (0.14-2.62)         | 0.76        |                          |             |
| <i>History of Injection Drug Use</i>        |                      |                      |                          |             |                          |             |
| HIV                                         | 4 (15)               | 12 (14)              | 1.03 (0.22-3.85)         | 1.00        | 0.75 (0.14-4.03)         | 0.73        |
|                                             | 8 (30)               | 10 (12)              | <b>3.07 (1.07-8.85)</b>  | <b>0.04</b> | <b>4.91 (1.00-24.36)</b> | <b>0.05</b> |
| <i>Admission Source</i>                     |                      |                      |                          |             |                          |             |
| Home                                        | 18 (67)              | 60 (72)              | Reference                |             |                          |             |
| NH/Rehab/LTACH                              | 8 (30)               | 15 (18)              | 1.77 (0.56-5.35)         | 0.39        |                          |             |
| Outside Hospital                            | 1 (4)                | 8 (10)               | 0.42 (0.01-3.51)         | 0.74        |                          |             |
| Prior Hospital Admission (90 Days)          | 23 (85)              | 47 (57)              | <b>4.40 (1.40-13.86)</b> | <b>0.01</b> | 3.54 (0.97-12.90)        | 0.06        |
| <i>Length of Hospital Stay Prior to BSI</i> |                      |                      |                          |             |                          |             |
| ≤3 Days                                     | 16 (59)              | 58 (70)              | 0.63 (0.26-1.54)         | 0.31        |                          |             |
| >3 Days                                     | 11 (41)              | 25 (30)              | Reference                |             | Reference                |             |
| <i>Frequent Healthcare Interaction</i>      |                      |                      |                          |             |                          |             |
| Hemodialysis                                | 8 (30)               | 14 (17)              | 2.51 (0.87-7.21)         | 0.09        | 1.30 (0.33-5.14)         | 0.70        |
| Infusion Center                             | 6 (22)               | 12 (14)              | 2.19 (0.69-6.93)         | 0.18        | 1.56 (0.40-6.15)         | 0.52        |
| None                                        | 13 (48)              | 57 (69)              | Reference                |             | Reference                |             |
| <sup>a</sup> Presence of Invasive Device    | 23 (85)              | 54 (65)              | 3.09 (0.97-9.79)         | 0.06        | 1.69 (0.40-7.20)         | 0.48        |
| <sup>b</sup> Invasive Procedures            | 10 (37)              | 34 (41)              | 0.85 (0.35-2.08)         | 0.72        |                          |             |
| Wound Present                               | 9 (33)               | 37 (45)              | 0.62 (0.25-1.54)         | 0.31        |                          |             |
| <i>Charlson Comorbidity Index (CCI)</i>     |                      |                      |                          |             |                          |             |
| 0-3                                         | 5 (19)               | 31 (37)              | Reference                |             | Reference                |             |
| 4-5                                         | 8 (30)               | 14 (17)              | <b>3.54 (0.98-12.78)</b> | <b>0.05</b> | 4.13 (0.96-17.69)        | 0.06        |
| 6-8                                         | 6 (22)               | 26 (31)              | 1.43 (0.39-5.23)         | 0.59        | 1.24 (0.27-5.68)         | 0.78        |
| >8                                          | 8 (30)               | 12 (14)              | <b>4.13 (1.13-15.18)</b> | <b>0.03</b> | 1.24 (0.20-7.62)         | 0.82        |
| History of Transplant                       | 4 (15)               | 10 (12)              | 1.27 (0.27-4.94)         | 0.93        |                          |             |
| History of MRSA Colonization                | 11 (41)              | 36 (43)              | 0.90 (0.37-2.17)         | 0.81        |                          |             |
| <i>Presumed Source of MRSA BSI</i>          |                      |                      |                          |             |                          |             |
| Peripheral Intravenous Catheter             | 2 (7)                | 9 (11)               | 0.66 (0.07-3.51)         | 0.93        |                          |             |
| Skin & Soft Tissue Infection                | 3 (11)               | 15 (18)              | 0.57 (0.10-2.27)         | 0.60        |                          |             |
| Pneumonia                                   | 3 (11)               | 9 (11)               | 1.03 (0.17-4.57)         | 1.00        |                          |             |
| Diabetic Foot Infection                     | 2 (7)                | 6 (7)                | 1.03 (0.10-6.23)         | 1.00        |                          |             |
| Vascular Access                             | 10 (37)              | 25 (30)              | 1.37 (0.55-3.39)         | 0.50        |                          |             |
| Septic Arthritis                            | 0 (0)                | 1 (1)                | --                       | --          |                          |             |
| Urinary Source                              | 0 (0)                | 1 (1)                | --                       | --          |                          |             |
| Sacral Wound                                | 3 (11)               | 3 (4)                | 3.29 (0.41-26.20)        | 0.31        |                          |             |
| Other/Unknown                               | 3 (11)               | 9 (11)               | 1.03 (0.17-4.57)         | 1.00        |                          |             |
| ICU Admission Prior to BSI                  | 5 (19)               | 11 (13)              | 1.48 (0.36-5.27)         | 0.69        |                          |             |

**Bold** = significant at ≤ 0.05

Abbreviations: MRSA, Methicillin-resistant *Staphylococcus aureus*; BSI, bloodstream infection; NH, nursing home; rehab, rehabilitation facility; LTACH, long-term acute care hospital; BSI, bloodstream infection; HIV, human immunodeficiency virus; AIDS, acquired immune deficiency syndrome; ICU, intensive care unit.

<sup>a</sup> Includes devices such as pacemaker, any vascular access, orthopedic hardware, foley catheter, arteriovenous graft placement, percutaneous endoscopic gastronomy (PEG), ostomy, or any type of urinary collection at the time of first positive bloodstream infection.

<sup>b</sup> Includes invasive procedures or surgery within the month prior to first positive bloodstream infection, excluding electroencephalogram (EEG), electrocardiogram (EKG), or transthoracic echocardiogram (TTE).

**Supplementary Table 4.** Demographics and Clinical Characteristics of MRSA BSIs in Patients Stratified by CC5/ST5 and CC5/ST105 with the Odds of Being CC5/ST5 vs CC5/ST105

| Factor                                      | CC5/ST5<br>N = 49 (%) | CC5/ST105<br>N = 61 (%) | Univariate Analysis     |              | Multivariate Analysis   |              |
|---------------------------------------------|-----------------------|-------------------------|-------------------------|--------------|-------------------------|--------------|
|                                             |                       |                         | OR (95% CI)             | p value      | OR (95% CI)             | p value      |
| Male                                        | 34 (69)               | 41 (67)                 | 1.11 (0.49-2.48)        | 0.81         |                         |              |
| <i>Race/Ethnicity</i>                       |                       |                         |                         |              |                         |              |
| Non-Hispanic White                          | 33 (67)               | 30 (49)                 | Reference               |              | Reference               |              |
| Non-Hispanic Black                          | <b>2 (4)</b>          | <b>18 (30)</b>          | <b>0.10 (0.01-0.49)</b> | <b>0.001</b> | <b>0.09 (0.02-0.49)</b> | <b>0.005</b> |
| Hispanic/Latino                             | 11 (22)               | 7 (11)                  | 1.42 (0.44-4.93)        | 0.70         | 2.22 (0.54-9.07)        | 0.27         |
| Asian                                       | 1 (2)                 | 3 (5)                   | 0.31 (0.01-4.08)        | 0.59         | 0.18 (0.01-2.51)        | 0.20         |
| Unknown                                     | 2 (4)                 | 3 (5)                   | 0.61 (0.05-5.71)        | 0.94         | 0.77 (0.08-7.05)        | 0.82         |
| <i>Age at Time of Infection</i>             |                       |                         |                         |              |                         |              |
| 18-54 Years                                 | 10 (20)               | 19 (31)                 | Reference               |              | Reference               |              |
| 55-69 Years                                 | 12 (24)               | 18 (30)                 | 1.27 (0.44-3.65)        | 0.66         | 1.06 (0.26-4.22)        | 0.94         |
| ≥70 Years                                   | 27 (55)               | 24 (39)                 | 2.14 (0.83-5.49)        | 0.11         | 2.13 (0.43-10.53)       | 0.36         |
| History of Injection Drug Use               | 5 (8)                 | 2 (4)                   | 0.48 (0.04-3.10)        | 0.64         | 0.31 (0.03-3.45)        | 0.34         |
| HIV                                         | 4 (7)                 | 0 (0)                   | --                      | --           |                         |              |
| <i>Admission Source</i>                     |                       |                         |                         |              |                         |              |
| Home                                        | 20 (41)               | 29 (48)                 | Reference               |              |                         |              |
| NH/Rehab/LTACH                              | 19 (39)               | 17 (28)                 | 1.62 (0.68-3.86)        | 0.28         |                         |              |
| Other Hospital                              | 10 (20)               | 15 (25)                 | 0.97 (0.36-2.58)        | 0.95         |                         |              |
| Prior Hospital Admission (90 Days)          | 44 (90)               | 45 (74)                 | <b>3.13 (1.06-9.28)</b> | <b>0.04</b>  | 3.24 (0.87-12.17)       | 0.08         |
| <i>Length of Hospital Stay Prior to BSI</i> |                       |                         |                         |              |                         |              |
| ≤3 Days                                     | 24 (49)               | 30 (49)                 | 0.99 (0.47-2.11)        | 0.98         |                         |              |
| >3 Days                                     | 25 (51)               | 31 (51)                 | Reference               |              |                         |              |
| <i>Frequent Healthcare Interaction</i>      |                       |                         |                         |              |                         |              |
| Hemodialysis                                | 8 (16)                | 10 (16)                 | 0.91 (0.28-2.89)        | 1.00         |                         |              |
| Infusion Center                             | 5 (10)                | 10 (16)                 | 0.57 (0.14-2.05)        | 0.50         |                         |              |
| None                                        | 36 (73)               | 41 (67)                 | Reference               |              |                         |              |
| <sup>a</sup> Presence of Invasive Device    | 43 (88)               | 52 (85)                 | 1.24 (0.41-3.76)        | 0.70         |                         |              |
| <sup>b</sup> Invasive Procedures            | 27 (55)               | 34 (56)                 | 0.98 (0.46-2.08)        | 0.95         |                         |              |
| Wound Present                               | 19 (39)               | 25 (41)                 | 0.91 (0.42-1.97)        | 0.81         |                         |              |
| <i>Charlson Comorbidity Index (CCI)</i>     |                       |                         |                         |              |                         |              |
| 0-3                                         | 11 (22)               | 18 (30)                 | Reference               |              | Reference               |              |
| 4-5                                         | 10 (20)               | 10 (16)                 | 1.64 (0.52-5.19)        | 0.40         | 0.98 (0.22-4.46)        | 0.98         |
| 6-8                                         | 20 (41)               | 13 (21)                 | 2.52 (0.90-7.02)        | 0.08         | 1.51 (0.36-6.40)        | 0.58         |
| >8                                          | 8 (16)                | 20 (33)                 | 0.66 (0.22-1.99)        | 0.45         | 0.24 (0.04-1.43)        | 0.12         |
| History of Transplant                       | 7 (14)                | 11 (18)                 | 0.76 (0.27-2.13)        | 0.60         |                         |              |
| History of MRSA Colonization                | 17 (35)               | 26 (43)                 | 0.72 (0.33-1.56)        | 0.40         |                         |              |
| <i>Presumed Source of MRSA BSI</i>          |                       |                         |                         |              |                         |              |
| Peripheral Intravenous Catheter             | 3 (6)                 | 2 (3)                   | 1.91 (0.21-23.78)       | 0.79         |                         |              |
| Skin & Soft Tissue Infection                | 2 (4)                 | 5 (8)                   | 0.48 (0.04-3.10)        | 0.64         |                         |              |
| Pneumonia                                   | 2 (4)                 | 8 (13)                  | 0.29 (0.03-1.53)        | 0.19         | 0.19 (0.03-1.23)        | 0.08         |
| Diabetic Foot Infection                     | 5 (10)                | 4 (7)                   | 1.61 (0.33-8.63)        | 0.73         |                         |              |
| Vascular Access                             | 14 (29)               | 27 (44)                 | 0.50 (0.23-1.12)        | 0.09         | 0.51 (0.18-1.50)        | 0.22         |
| Septic Arthritis                            | 2 (4)                 | 0 (0)                   | --                      | --           |                         |              |
| Urinary Source                              | 2 (4)                 | 1 (2)                   | 2.53 (0.13-153.09)      | 0.84         |                         |              |
| Sacral Wound                                | 5 (10)                | 0 (0)                   | --                      | --           |                         |              |
| Other/Unknown                               | 6 (12)                | 8 (13)                  | 0.93 (0.24-3.31)        | 1.00         |                         |              |
| ICU Admission Prior to BSI                  | 11 (22)               | 13 (21)                 | 1.07 (0.43-2.65)        | 0.89         |                         |              |

**Bold** = significant at ≤ 0.05

Abbreviations: MRSA, Methicillin-resistant *Staphylococcus aureus*; BSI, bloodstream infection; NH, nursing home; rehab, rehabilitation facility; LTACH, long-term acute care hospital; BSI, bloodstream infection; HIV, human immunodeficiency virus; AIDS, acquired immune deficiency syndrome; ICU, intensive care unit.

<sup>a</sup>Includes devices such as pacemaker, any vascular access, orthopedic hardware, foley catheter, arteriovenous graft placement, percutaneous endoscopic gastrostomy (PEG), ostomy, or any type of urinary collection at the time of first positive bloodstream infection.

<sup>b</sup>Includes invasive procedures or surgery within the month prior to first positive bloodstream infection, excluding electroencephalogram (EEG), electrocardiogram (EKG), or transthoracic echocardiogram (TTE).



**Supplementary Table 5.** Demographics and Clinical Characteristics of MRSA BSIs in the HO-MRSA Stratum with the Odds of being CC8 vs CC5

| Factor                                   |                   |                   | Univariate Analysis      |              | Multivariate Analysis    |             |
|------------------------------------------|-------------------|-------------------|--------------------------|--------------|--------------------------|-------------|
|                                          | CC8<br>N = 36 (%) | CC5<br>N = 59 (%) | OR (95% CI)              | p value      | OR (95% CI)              | p value     |
| Male                                     | 23 (64)           | 38 (64)           | 0.98 (0.41-2.32)         | 0.96         |                          |             |
| <i>Race/Ethnicity</i>                    |                   |                   |                          |              |                          |             |
| Non-Hispanic White                       | 10 (28)           | 38 (64)           | Reference                |              | Reference                |             |
| Non-Hispanic Black                       | 13 (36)           | 10 (17)           | <b>4.81 (1.48-16.68)</b> | <b>0.007</b> | <b>5.49 (1.34-26.66)</b> | <b>0.01</b> |
| Hispanic/Latino                          | 9 (25)            | 7 (12)            | <b>4.74 (1.24-19.42)</b> | <b>0.02</b>  | 4.40 (0.83-26.09)        | 0.09        |
| Asian                                    | 2 (6)             | 0 (0)             | 8.21 (0.95-Infinity)     | 0.05         | 6.86 (0.80-Infinity)     | 0.07        |
| Unknown                                  | 2 (6)             | 4 (7)             | 1.87 (0.15-15.43)        | 0.80         | 2.49 (0.18-24.70)        | 0.64        |
| <i>Age at Time of Infection</i>          |                   |                   |                          |              |                          |             |
| 18-54 Years                              | 16 (44)           | 20 (34)           | Reference                |              |                          |             |
| 55-69 Years                              | 9 (25)            | 15 (25)           | 0.75 (0.26-2.16)         | 0.59         |                          |             |
| ≥ 70 Years                               | 11 (31)           | 24 (41)           | 0.57 (0.22-1.51)         | 0.26         |                          |             |
| History of Injection Drug Use            | 3 (8)             | 3 (5)             | 1.69 (0.21-13.34)        | 0.82         | 1.43 (0.15-13.53)        | 0.76        |
| HIV                                      | 5 (14)            | 4 (7)             | 2.20 (0.44-11.94)        | 0.43         |                          |             |
| <i>Admission Source</i>                  |                   |                   |                          |              |                          |             |
| Home                                     | 24 (67)           | 28 (47)           | Reference                |              | Reference                |             |
| NH/Rehab/LTACH                           | 8 (22)            | 12 (20)           | 0.78 (0.23-2.49)         | 0.84         | 0.88 (0.19-4.02)         | 0.87        |
| Other Hospital                           | 4 (11)            | 19 (32)           | <b>0.25 (0.05-0.90)</b>  | <b>0.03</b>  | 0.34 (0.07-1.59)         | 0.17        |
| Prior Hospital Admission (90 Days)       | 26 (72)           | 45 (76)           | 0.81 (0.32-2.08)         | 0.66         |                          |             |
| <i>Frequent Healthcare Interaction</i>   |                   |                   |                          |              |                          |             |
| Hemodialysis                             | 3 (8)             | 4 (7)             | 1.56 (0.21-10.16)        | 0.86         | 0.49 (0.06-3.93)         | 0.50        |
| Infusion Center                          | 12 (33)           | 11 (19)           | 2.26 (0.77-6.74)         | 0.15         | 1.72 (0.39-7.68)         | 0.48        |
| None                                     | 21 (58)           | 44 (75)           | Reference                |              | Reference                |             |
| <sup>a</sup> Presence of Invasive Device | 31 (86)           | 54 (92)           | 0.57 (0.15-2.14)         | 0.41         |                          |             |
| <sup>b</sup> Invasive Procedures         | 28 (78)           | 44 (75)           | 1.19 (0.45-3.18)         | 0.72         |                          |             |
| Wound Present                            | 10 (28)           | 26 (44)           | 0.49 (0.20-1.19)         | 0.12         | 0.41 (0.11-1.51)         | 0.18        |
| <i>Charlson Comorbidity Index (CCI)</i>  |                   |                   |                          |              |                          |             |
| 0-3                                      | 13 (36)           | 20 (34)           | Reference                |              |                          |             |
| 4-5                                      | 11 (31)           | 13 (22)           | 1.30 (0.45-3.77)         | 0.63         |                          |             |
| 6-8                                      | 9 (25)            | 17 (29)           | 0.81 (0.28-2.37)         | 0.71         |                          |             |
| >8                                       | 3 (8)             | 9 (15)            | 0.51 (0.12-2.26)         | 0.38         |                          |             |
| History of Transplant                    | 7 (19)            | 12 (20)           | 0.95 (0.28-2.97)         | 1.00         |                          |             |
| History of MRSA Colonization             | 14 (39)           | 22 (37)           | 1.07 (0.46-2.51)         | 0.88         |                          |             |
| <i>Presumed Source of MRSA Infection</i> |                   |                   |                          |              |                          |             |
| Peripheral Intravenous Catheter          | 6 (17)            | 4 (7)             | 2.75 (0.72-10.51)        | 0.14         | <b>9.84 (1.46-66.50)</b> | <b>0.02</b> |
| Skin & Soft Tissue Infection             | 4 (11)            | 4 (7)             | 1.71 (0.30-9.85)         | 0.71         |                          |             |
| Pneumonia                                | 4 (11)            | 6 (10)            | 1.10 (0.21-5.07)         | 1.00         |                          |             |
| Diabetic Foot Infection                  | 0 (0)             | 2 (3)             | --                       | --           |                          |             |
| Vascular Access                          | 19 (53)           | 23 (39)           | 1.75 (0.76-4.04)         | 0.19         | 3.15 (0.84-11.86)        | 0.09        |
| Septic Arthritis                         | 0 (0)             | 2 (3)             | --                       | --           |                          |             |
| Urinary Source                           | 0 (0)             | 1 (2)             | --                       | --           |                          |             |
| Sacral Wound                             | 0 (0)             | 2 (3)             | --                       | --           |                          |             |
| Other/Unknown                            | 2 (6)             | 10 (17)           | 0.29 (0.03-1.50)         | 0.19         | 0.81 (0.09-6.96)         | 0.85        |
| ICU Admission Prior to BSI               | 12 (33)           | 25 (42)           | 0.68 (0.29-1.61)         | 0.38         |                          |             |

**Bold** = significant at  $\leq 0.05$

Abbreviations: MRSA, Methicillin-resistant *Staphylococcus aureus*; BSI, bloodstream infection; HO, hospital-onset; NH, nursing home; rehab, rehabilitation facility; LTACH, long-term acute care hospital; BSI, bloodstream infection; HIV, human immunodeficiency virus; AIDS, acquired immune deficiency syndrome; ICU, intensive care unit.

<sup>a</sup> Includes devices such as pacemaker, any vascular access, orthopedic hardware, foley catheter, arteriovenous graft placement, percutaneous endoscopic gastronomy (PEG), ostomy, or any type of urinary collection at the time of first positive bloodstream infection.

<sup>b</sup> Includes invasive procedures or surgery within the month prior to first positive bloodstream infection, excluding electroencephalogram (EEG), electrocardiogram (EKG), or transthoracic echocardiogram (TTE).

**Supplementary Table 6.** Demographics and Clinical Characteristics of MRSA BSIs in the CO-MRSA Stratum with the Odds of being CC8 vs CC5

| Factor                                   | CC8        |            | CC5                     |                  | Univariate Analysis     |              | Multivariate Analysis |  |
|------------------------------------------|------------|------------|-------------------------|------------------|-------------------------|--------------|-----------------------|--|
|                                          | N = 74 (%) | N = 58 (%) | OR (95% CI)             | p value          | OR (95% CI)             | p value      |                       |  |
| Male                                     | 50 (68)    | 40 (69)    | 0.94 (0.45-1.96)        | 0.86             |                         |              |                       |  |
| <i>Race/Ethnicity</i>                    |            |            |                         |                  |                         |              |                       |  |
| Non-Hispanic White                       | 21 (28)    | 29 (50)    | Reference               |                  | Reference               |              |                       |  |
| Non-Hispanic Black                       | 28 (38)    | 12 (21)    | <b>3.18 (1.23-8.58)</b> | <b>0.01</b>      | <b>3.04 (1.02-9.05)</b> | <b>0.05</b>  |                       |  |
| Hispanic/Latino                          | 18 (24)    | 12 (21)    | 2.05 (0.75-5.79)        | 0.18             | 2.19 (0.68-7.08)        | 0.19         |                       |  |
| Asian                                    | 2 (3)      | 4 (7)      | 0.70 (0.06-5.38)        | 1.00             | 0.63 (0.07-5.63)        | 0.67         |                       |  |
| Unknown                                  | 5 (7)      | 1 (2)      | 6.69 (0.68-337.57)      | 0.14             | 3.52 (0.29-43.16)       | 0.33         |                       |  |
| <i>Age at Time of Infection</i>          |            |            |                         |                  |                         |              |                       |  |
| 18-54 Years                              | 32 (43)    | 8 (14)     | Reference               |                  | Reference               |              |                       |  |
| 55-69 Years                              | 27 (36)    | 14 (24)    | 0.52 (0.20-1.31)        | 0.16             | 0.38 (0.11-1.34)        | 0.13         |                       |  |
| ≥ 70 Years                               | 15 (20)    | 36 (62)    | <b>0.11 (0.04-0.29)</b> | <b>&lt;0.001</b> | <b>0.10 (0.02-0.44)</b> | <b>0.002</b> |                       |  |
| History of Injection Drug Use            | 13 (18)    | 5 (9)      | 2.86 (0.82-12.75)       | 0.12             | 1.13 (0.24-5.26)        | 0.88         |                       |  |
| HIV                                      | 13 (18)    | 0 (0)      | --                      | --               |                         |              |                       |  |
| <i>Admission Source</i>                  |            |            |                         |                  |                         |              |                       |  |
| Home                                     | 54 (73)    | 26 (45)    | Reference               |                  | Reference               |              |                       |  |
| NH/Rehab/LTACH                           | 15 (20)    | 24 (41)    | <b>0.29 (0.12-0.69)</b> | <b>0.003</b>     | 0.56 (0.18-1.73)        | 0.32         |                       |  |
| Other Hospital                           | 5 (7)      | 8 (14)     | <b>0.35 (0.08-1.41)</b> | <b>0.16</b>      | 1.82 (0.33-10.03)       | 0.49         |                       |  |
| Prior Hospital Admission (90 Days)       | 44 (59)    | 47 (81)    | <b>0.34 (0.15-0.77)</b> | <b>0.009</b>     | 0.48 (0.14-1.70)        | 0.25         |                       |  |
| <i>Frequent Healthcare Interaction</i>   |            |            |                         |                  |                         |              |                       |  |
| Hemodialysis                             | 19 (26)    | 15 (26)    | 1.08 (0.45-2.65)        | 1.00             |                         |              |                       |  |
| Infusion Center                          | 6 (8)      | 5 (9)      | 0.96 (0.22-4.27)        | 1.00             |                         |              |                       |  |
| None                                     | 49 (66)    | 38 (66)    | Reference               |                  |                         |              |                       |  |
| <sup>a</sup> Presence of Invasive Device | 46 (62)    | 49 (84)    | <b>0.34 (0.15-0.78)</b> | <b>0.01</b>      | 0.80 (0.26-2.46)        | 0.69         |                       |  |
| <sup>b</sup> Invasive Procedures         | 16 (22)    | 21 (36)    | 0.49 (0.23-1.05)        | 0.07             | 0.56 (0.20-1.62)        | 0.29         |                       |  |
| Wound Present                            | 36 (49)    | 23 (40)    | 1.55 (0.77-3.12)        | 0.22             |                         |              |                       |  |
| <i>Charlson Comorbidity Index (CCI)</i>  |            |            |                         |                  |                         |              |                       |  |
| 0-3                                      | 26 (35)    | 12 (21)    | Reference               |                  | Reference               |              |                       |  |
| 4-5                                      | 15 (20)    | 9 (16)     | 0.77 (0.26-2.25)        | 0.63             | 1.59 (0.36-7.04)        | 0.54         |                       |  |
| 6-8                                      | 21 (28)    | 18 (31)    | 0.54 (0.21-1.36)        | 0.19             | 2.25 (0.58-8.72)        | 0.24         |                       |  |
| >8                                       | 12 (16)    | 19 (33)    | <b>0.29 (0.11-0.79)</b> | <b>0.02</b>      | 1.73 (0.36-8.33)        | 0.49         |                       |  |
| History of Transplant                    | 7 (9)      | 6 (10)     | 0.91 (0.24-3.48)        | 1.00             |                         |              |                       |  |
| History of MRSA Colonization             | 33 (45)    | 25 (43)    | 1.06 (0.53-2.12)        | 0.86             |                         |              |                       |  |
| <i>Presumed Source of MRSA Infection</i> |            |            |                         |                  |                         |              |                       |  |
| Peripheral Intravenous Catheter          | 5 (7)      | 1 (2)      | 4.13 (0.47-36.37)       | 0.20             | 6.38 (0.44-92.90)       | 0.18         |                       |  |
| Skin & Soft Tissue Infection             | 11 (15)    | 2 (3)      | 3.13 (0.91-13.84)       | 0.08             | 1.60 (0.35-7.38)        | 0.55         |                       |  |
| Pneumonia                                | 10 (14)    | 5 (9)      | 1.05 (0.30-3.92)        | 1.00             |                         |              |                       |  |
| Diabetic Foot Infection                  | 7 (9)      | 7 (12)     | 0.88 (0.26-3.07)        | 1.00             |                         |              |                       |  |
| Vascular Access                          | 17 (23)    | 20 (34)    | 0.52 (0.24-1.14)        | 0.10             | 0.80 (0.27-2.37)        | 0.68         |                       |  |
| Septic Arthritis                         | 1 (1)      | 0 (0)      | --                      | --               |                         |              |                       |  |
| Urinary Source                           | 1 (1)      | 3 (5)      | 0.39 (0.01-7.60)        | 0.82             |                         |              |                       |  |
| Sacral Wound                             | 6 (8)      | 3 (5)      | 1.61 (0.33-10.41)       | 0.76             |                         |              |                       |  |
| Other/Unknown                            | 5 (7)      | 3 (5)      | 1.35 (0.41-4.84)        | 0.78             |                         |              |                       |  |
| ICU Admission Prior to BSI               | 4 (5)      | 1 (2)      | 3.23 (0.31-163.17)      | 0.54             |                         |              |                       |  |

**Bold** = significant at  $\leq 0.05$

Abbreviations: MRSA, Methicillin-resistant *Staphylococcus aureus*; BSI, bloodstream infection; CO, community-onset; NH, nursing home; rehab, rehabilitation facility; LTACH, long-term acute care hospital; BSI, bloodstream infection; HIV, human immunodeficiency virus; AIDS, acquired immune deficiency syndrome; ICU, intensive care unit.

<sup>a</sup> Includes devices such as pacemaker, any vascular access, orthopedic hardware, foley catheter, arteriovenous graft placement, percutaneous endoscopic gastronomy (PEG), ostomy, or any type of urinary collection at the time of first positive bloodstream infection.

<sup>b</sup> Includes invasive procedures or surgery within the month prior to first positive bloodstream infection, excluding electroencephalogram (EEG), electrocardiogram (EKG), or transthoracic echocardiogram (TTE).

**Supplementary Table 7. Univariate and multivariate analysis of comorbidities**

**A. CC8 vs CC5**

| Factor                        | CC8         | CC5         | Univariate Analysis     |             | Multivariate Analysis |         |
|-------------------------------|-------------|-------------|-------------------------|-------------|-----------------------|---------|
|                               | N = 110 (%) | N = 117 (%) | OR (95% CI)             | p value     | OR (95% CI)           | p value |
| <i>Comorbidities</i>          |             |             |                         |             |                       |         |
| Myocardial Infarction         | 9 (8)       | 14 (12)     | 0.66 (0.27-1.58)        | 0.35        | 1.02 (0.38-2.73)      | 0.97    |
| Congestive Heart Failure      | 21 (19)     | 33 (28)     | 0.60 (0.32-1.12)        | 0.11        | 0.65 (0.32-1.32)      | 0.23    |
| Peripheral Vascular Disease   | 12 (11)     | 25 (21)     | <b>0.45 (0.21-0.95)</b> | <b>0.04</b> | 0.42 (0.16-1.09)      | 0.08    |
| Cerebrovascular Disease       | 6 (5)       | 14 (12)     | 0.43 (0.13-1.24)        | 0.13        | 0.50 (0.17-1.46)      | 0.21    |
| Dementia                      | 9 (8)       | 20 (17)     | <b>0.43 (0.19-1.00)</b> | <b>0.05</b> | 0.43 (0.17-1.08)      | 0.07    |
| Chronic Pulmonary Disease     | 11 (10)     | 19 (16)     | 0.57 (0.26-1.27)        | 0.17        | 0.60 (0.25-1.45)      | 0.26    |
| Connective Tissue Disease     | 2 (2)       | 3 (3)       | 0.71 (0.06-6.28)        | 1.00        | 0.60 (0.09-4.13)      | 0.61    |
| Peptic Ulcer Disease          | 2 (2)       | 6 (5)       | 0.34 (0.03-1.98)        | 0.32        | 0.39 (0.07-2.20)      | 0.28    |
| Mild Liver Disease            | 0 (0)       | 2 (2)       | --                      | --          | --                    | --      |
| Diabetes (no complications)   | 17 (15)     | 20 (17)     | 0.89 (0.44-1.80)        | 0.74        | 0.71 (0.33-1.53)      | 0.38    |
| Diabetes with Organ Damage    | 23 (21)     | 28 (24)     | 0.84 (0.45-1.57)        | 0.59        | 1.22 (0.48-3.08)      | 0.68    |
| Para or Hemiplegia            | 7 (6)       | 10 (9)      | 0.73 (0.27-1.98)        | 0.53        | 0.71 (0.24-2.08)      | 0.53    |
| Moderate/Severe Renal Disease | 27 (25)     | 28 (24)     | 1.03 (0.56-1.90)        | 0.91        | 1.14 (0.53-2.46)      | 0.73    |
| Solid Tumor                   | 8 (7)       | 15 (13)     | 0.53 (0.22-1.31)        | 0.17        | 0.58 (0.22-1.52)      | 0.27    |
| Leukemia                      | 6 (5)       | 7 (6)       | 0.91 (0.30-2.79)        | 0.86        | 0.79 (0.24-2.58)      | 0.70    |
| Lymphoma/Multiple Myeloma     | 13 (12)     | 13 (11)     | 1.07 (0.47-2.43)        | 0.87        | 0.74 (0.31-1.80)      | 0.51    |
| Moderate/Severe Liver Disease | 11 (10)     | 6 (5)       | 2.06 (0.73-5.76)        | 0.17        | 1.77 (0.57-5.47)      | 0.32    |
| Metastatic Solid Tumor        | 5 (5)       | 9 (8)       | 0.57 (0.15-1.98)        | 0.48        | 0.48 (0.14-1.62)      | 0.24    |

**B. CO-MRSA vs HO-MRSA**

| Factor                        | CO-MRSA     | HO-MRSA    | Univariate Analysis     |              | Multivariate Analysis   |             |
|-------------------------------|-------------|------------|-------------------------|--------------|-------------------------|-------------|
|                               | N = 132 (%) | N = 95 (%) | OR (95% CI)             | p value      | OR (95% CI)             | p value     |
| <i>Comorbidities</i>          |             |            |                         |              |                         |             |
| Myocardial Infarction         | 9 (7)       | 14 (15)    | 0.43 (0.15-1.11)        | 0.09         | <b>0.26 (0.09-0.75)</b> | <b>0.01</b> |
| Congestive Heart Failure      | 34 (26)     | 20 (21)    | 1.30 (0.69-2.44)        | 0.41         | 1.24 (0.58-2.66)        | 0.57        |
| Peripheral Vascular Disease   | 29 (22)     | 8 (8)      | <b>3.06 (1.33-7.04)</b> | <b>0.009</b> | 2.41 (0.86-6.73)        | 0.09        |
| Cerebrovascular Disease       | 10 (8)      | 10 (11)    | 0.70 (0.28-1.75)        | 0.44         | 0.43 (0.15-1.28)        | 0.13        |
| Dementia                      | 20 (15)     | 9 (9)      | 1.71 (0.74-3.93)        | 0.21         | 1.66 (0.63-4.39)        | 0.31        |
| Chronic Pulmonary Disease     | 15 (11)     | 15 (16)    | 0.68 (0.32-1.48)        | 0.33         | 0.70 (0.28-1.81)        | 0.47        |
| Connective Tissue Disease     | 4 (3)       | 1 (1)      | 2.93 (0.28-146.18)      | 0.61         | 1.90 (0.18-19.84)       | 0.59        |
| Peptic Ulcer Disease          | 6 (5)       | 2 (2)      | 2.21 (0.38-22.84)       | 0.55         | 1.76 (0.29-10.82)       | 0.54        |
| Mild Liver Disease            | 1 (1)       | 1 (1)      | 0.72 (0.01-56.92)       | 1.00         | 0.40 (0.01-11.31)       | 0.59        |
| Diabetes (no complications)   | 19 (14)     | 18 (19)    | 0.72 (0.36-1.46)        | 0.36         | 0.92 (0.41-2.04)        | 0.83        |
| Diabetes with Organ Damage    | 39 (30)     | 12 (13)    | <b>2.90 (1.42-5.91)</b> | <b>0.003</b> | 1.28 (0.48-3.40)        | 0.62        |
| Para or Hemiplegia            | 11 (8)      | 6 (6)      | 1.35 (0.44-4.61)        | 0.76         | 1.17 (0.37-3.64)        | 0.79        |
| Moderate/Severe Renal Disease | 42 (32)     | 13 (14)    | <b>2.94 (1.48-5.87)</b> | <b>0.002</b> | 2.11 (0.92-4.87)        | 0.08        |
| Solid Tumor                   | 10 (8)      | 13 (14)    | 0.52 (0.22-1.24)        | 0.14         | 0.45 (0.17-1.23)        | 0.12        |
| Leukemia                      | 4 (3)       | 9 (9)      | 0.30 (0.07-1.12)        | 0.08         | 0.37 (0.10-1.32)        | 0.13        |
| Lymphoma/Multiple Myeloma     | 7 (5)       | 19 (20)    | <b>0.23 (0.08-0.59)</b> | <b>0.001</b> | <b>0.29 (0.11-0.78)</b> | <b>0.01</b> |
| Moderate/Severe Liver Disease | 11 (8)      | 6 (6)      | 1.35 (0.48-3.78)        | 0.57         | 1.02 (0.34-3.13)        | 0.97        |
| Metastatic Solid Tumor        | 9 (7)       | 5 (5)      | 1.32 (0.38-5.17)        | 0.85         | 1.26 (0.36-4.38)        | 0.72        |

**C. CC8 vs CC5 in the HO-MRSA Stratum**

| Factor                         | CC8        | CC5        | Univariate Analysis      |             | Multivariate Analysis |         |
|--------------------------------|------------|------------|--------------------------|-------------|-----------------------|---------|
|                                | N = 36 (%) | N = 59 (%) | OR (95% CI)              | p value     | OR (95% CI)           | p value |
| <i>Comorbidities</i>           |            |            |                          |             |                       |         |
| *Myocardial Infarction         | 6 (17)     | 8 (14)     | 1.28 (0.40-4.03)         | 0.68        | 2.72 (0.64-11.63)     | 0.18    |
| *Congestive Heart Failure      | 5 (14)     | 15 (25)    | 0.48 (0.12-1.57)         | 0.28        | 0.71 (0.19-2.69)      | 0.62    |
| *Peripheral Vascular Disease   | 2 (6)      | 6 (10)     | 0.52 (0.05-3.15)         | 0.71        | 1.16 (0.13-10.76)     | 0.90    |
| *Cerebrovascular Disease       | 3 (8)      | 7 (12)     | 0.68 (0.11-3.23)         | 0.86        | 0.65 (0.13-3.15)      | 0.59    |
| *Dementia                      | 1 (3)      | 8 (14)     | 0.19 (0.004-1.48)        | 0.16        | 0.15 (0.01-1.81)      | 0.13    |
| *Chronic Pulmonary Disease     | 5 (14)     | 10 (17)    | 0.79 (0.19-2.84)         | 0.93        | 0.70 (0.17-2.82)      | 0.61    |
| *Connective Tissue Disease     | 0 (0)      | 1 (2)      | --                       | --          | --                    | --      |
| Peptic Ulcer Disease           | 0 (0)      | 2 (3)      | --                       | --          | --                    | --      |
| Mild Liver Disease             | 0 (0)      | 1 (2)      | --                       | --          | --                    | --      |
| *Diabetes (no complications)   | 5 (14)     | 13 (22)    | 0.57 (0.15-1.94)         | 0.48        | 0.38 (0.10-1.44)      | 0.16    |
| *Diabetes with Organ Damage    | 5 (14)     | 7 (12)     | 1.20 (0.27-4.82)         | 1.00        | 2.38 (0.42-13.40)     | 0.32    |
| *Para or Hemiplegia            | 1 (3)      | 5 (8)      | 0.31 (0.01-2.96)         | 0.52        | 0.48 (0.04-5.15)      | 0.54    |
| *Moderate/Severe Renal Disease | 5 (14)     | 8 (14)     | 1.03 (0.24-3.95)         | 1.00        | 0.68 (0.15-3.12)      | 0.62    |
| *Solid Tumor                   | 6 (17)     | 7 (12)     | 1.49 (0.46-4.83)         | 0.51        | 1.79 (0.47-6.83)      | 0.39    |
| *Leukemia                      | 3 (8)      | 6 (10)     | 0.81 (0.12-4.08)         | 1.00        | 1.22 (0.24-6.17)      | 0.81    |
| Lymphoma/Multiple Myeloma      | 11 (31)    | 8 (14)     | <b>2.81 (1.003-7.85)</b> | <b>0.05</b> | 2.75 (0.85-8.90)      | 0.09    |
| *Moderate/Severe Liver Disease | 4 (11)     | 2 (3)      | 3.51 (0.47-40.85)        | 0.29        | 5.04 (0.68-37.27)     | 0.11    |
| *Metastatic Solid Tumor        | 1 (3)      | 4 (7)      | 0.40 (0.01-4.22)         | 0.74        | 0.47 (0.04-5.79)      | 0.55    |

#### D. CC8 vs CC5 in the CO-MRSA Stratum

| Factor                        | CC8        | CC5        | Univariate Analysis     |             | Multivariate Analysis   |             |
|-------------------------------|------------|------------|-------------------------|-------------|-------------------------|-------------|
|                               | N = 74 (%) | N = 58 (%) | OR (95% CI)             | p value     | OR (95% CI)             | p value     |
| Comorbidities                 |            |            |                         |             |                         |             |
| Myocardial Infarction         | 3 (4)      | 6 (10)     | 0.37 (0.06-1.82)        | 0.28        | 0.71 (0.13-3.84)        | 0.69        |
| Congestive Heart Failure      | 16 (22)    | 18 (31)    | 0.61 (0.28-1.34)        | 0.22        | 0.46 (0.17-1.24)        | 0.13        |
| Peripheral Vascular Disease   | 10 (14)    | 19 (33)    | <b>0.32 (0.14-0.76)</b> | <b>0.01</b> | <b>0.29 (0.08-0.99)</b> | <b>0.05</b> |
| Cerebrovascular Disease       | 3 (4)      | 7 (12)     | 0.31 (0.05-1.44)        | 0.16        | 0.37 (0.08-1.75)        | 0.21        |
| Dementia                      | 8 (11)     | 12 (21)    | 0.47 (0.18-1.23)        | 0.12        | 0.45 (0.14-1.45)        | 0.18        |
| Chronic Pulmonary Disease     | 6 (8)      | 10 (17)    | 0.48 (0.16-1.44)        | 0.19        | 0.53 (0.14-1.98)        | 0.34        |
| Connective Tissue Disease     | 2 (3)      | 2 (3)      | 0.78 (0.06-11.06)       | 1.00        | 0.40 (0.05-3.37)        | 0.40        |
| Peptic Ulcer Disease          | 2 (3)      | 4 (7)      | 0.38 (0.03-2.75)        | 0.47        | 0.44 (0.06-3.42)        | 0.43        |
| Mild Liver Disease            | 0 (0)      | 1 (2)      | --                      | --          | --                      | --          |
| Diabetes (no complications)   | 12 (16)    | 7 (12)     | 1.41 (0.52-3.85)        | 0.50        | 0.81 (0.25-2.68)        | 0.73        |
| Diabetes with Organ Damage    | 18 (24)    | 22 (38)    | 0.57 (0.27-1.20)        | 0.14        | 1.16 (0.33-4.12)        | 0.81        |
| Para or Hemiplegia            | 6 (8)      | 5 (9)      | 0.94 (0.22-4.10)        | 1.00        | 0.70 (0.17-2.90)        | 0.62        |
| Moderate/Severe Renal Disease | 22 (30)    | 21 (36)    | 0.80 (0.39-1.68)        | 0.56        | 0.93 (0.34-2.57)        | 0.89        |
| Solid Tumor                   | 2 (3)      | 8 (14)     | <b>0.18 (0.02-0.93)</b> | <b>0.04</b> | 0.20 (0.03-1.14)        | 0.07        |
| Leukemia                      | 3 (4)      | 1 (2)      | 2.39 (0.19-128.62)      | 0.81        | 10.16 (0.38-271.84)     | 0.17        |
| Lymphoma/Multiple Myeloma     | 2 (3)      | 5 (9)      | 0.30 (0.03-1.90)        | 0.27        | <b>0.06 (0.01-0.54)</b> | <b>0.01</b> |
| Moderate/Severe Liver Disease | 7 (9)      | 4 (7)      | 1.41 (0.34-6.91)        | 0.84        | 1.06 (0.23-4.83)        | 0.94        |
| Metastatic Solid Tumor        | 4 (5)      | 5 (9)      | 0.61 (0.12-2.98)        | 0.70        | 0.30 (0.06-1.43)        | 0.13        |

**Supplementary Table 8.** Univariate analysis of outcomes

**(A) CC8 vs CC5**

| Outcome                                                  | CC8         | CC5         | Univariate Analysis     |             |
|----------------------------------------------------------|-------------|-------------|-------------------------|-------------|
|                                                          | N = 110 (%) | N = 117 (%) | OR (95% CI)             | p value     |
| Overall 90 Day Mortality                                 | 23 (21)     | 38 (32)     | <b>0.55 (0.30-1.00)</b> | <b>0.05</b> |
| 90 Day Mortality Related to MRSA BSI                     | 20 (17)     | 13 (12)     | 0.65 (0.31-1.38)        | 0.26        |
| ICU Admission Related to MRSA BSI (Missing=139)          | 27 (60)     | 17 (40)     | 2.29 (0.98-5.39)        | 0.06        |
| Mechanical Ventilation Related to MRSA BSI (Missing=154) | 23 (66)     | 17 (45)     | 2.37 (0.92-6.10)        | 0.07        |
| Metastatic Infection (Missing=1)                         | 24 (22)     | 22 (19)     | 1.19 (0.62-2.28)        | 0.59        |

**(B) CO-MRSA vs HO-MRSA**

| Outcome                                                  | CO-MRSA     | HO-MRSA    | Univariate Analysis       |                  |
|----------------------------------------------------------|-------------|------------|---------------------------|------------------|
|                                                          | N = 132 (%) | N = 95 (%) | OR (95% CI)               | p value          |
| Overall 90 Day Mortality                                 | 30 (23)     | 31 (33)    | 0.61 (0.34-1.10)          | 0.10             |
| 90 Day Mortality Related to MRSA BSI                     | 20 (15)     | 13 (14)    | 1.13 (0.53-2.39)          | 0.76             |
| ICU Admission Related to MRSA BSI (Missing=139)          | 31 (79)     | 13 (27)    | <b>10.73 (3.94-29.26)</b> | <b>&lt;0.001</b> |
| Mechanical Ventilation Related to MRSA BSI (Missing=154) | 24 (71)     | 16 (41)    | <b>3.45 (1.30-9.15)</b>   | <b>0.01</b>      |
| Metastatic Infection (Missing=1)                         | 33 (25)     | 13 (14)    | <b>2.08 (1.03-4.21)</b>   | <b>0.04</b>      |

**(C) CC8 vs CC5 in the HO-MRSA Stratum**

| Outcome                                                 | CC8        | CC5        | Univariate Analysis |         |
|---------------------------------------------------------|------------|------------|---------------------|---------|
|                                                         | N = 36 (%) | N = 59 (%) | OR (95% CI)         | p value |
| Overall 90 Day Mortality                                | 11 (31)    | 20 (34)    | 0.86 (0.35-2.09)    | 0.74    |
| 90 Day Mortality Related to MRSA BSI                    | 5 (14)     | 8 (14)     | 1.03 (0.31-3.43)    | 0.96    |
| ICU Admission Related to MRSA BSI (Missing=46)          | 3 (18)     | 10 (31)    | 0.47 (0.11-2.02)    | 0.31    |
| Mechanical Ventilation Related to MRSA BSI (Missing=56) | 6 (46)     | 10 (38)    | 1.37 (0.36-5.27)    | 0.65    |
| Metastatic Infection (Missing=1)                        | 5 (14)     | 8 (14)     | 1.01 (0.30-3.36)    | 0.99    |

**(D) CC8 vs CC5 in the CO-MRSA Stratum**

| Outcome                                                 | CC8        | CC5        | Univariate Analysis     |             |
|---------------------------------------------------------|------------|------------|-------------------------|-------------|
|                                                         | N = 74 (%) | N = 58 (%) | OR (95% CI)             | p value     |
| Overall 90 Day Mortality                                | 12 (16)    | 18 (31)    | <b>0.43 (0.19-0.99)</b> | <b>0.05</b> |
| 90 Day Mortality Related to MRSA BSI                    | 8 (11)     | 12 (21)    | 0.47 (0.18-1.23)        | 0.12        |
| ICU Admission Related to MRSA BSI (Missing=93)          | 24 (86)    | 7 (64)     | 3.43 (0.68-17.35)       | 0.14        |
| Mechanical Ventilation Related to MRSA BSI (Missing=98) | 17 (77)    | 7 (58)     | 2.43 (0.53-11.11)       | 0.25        |
| Metastatic Infection                                    | 19 (26)    | 14 (24)    | 1.09 (0.49-2.41)        | 0.84        |

Abbreviations: MRSA, methicillin-resistant *Staphylococcus aureus*; ICU, intensive care unit.

**Supplementary Figure 1. Core-genome MLST based tree of MRSA isolates.**

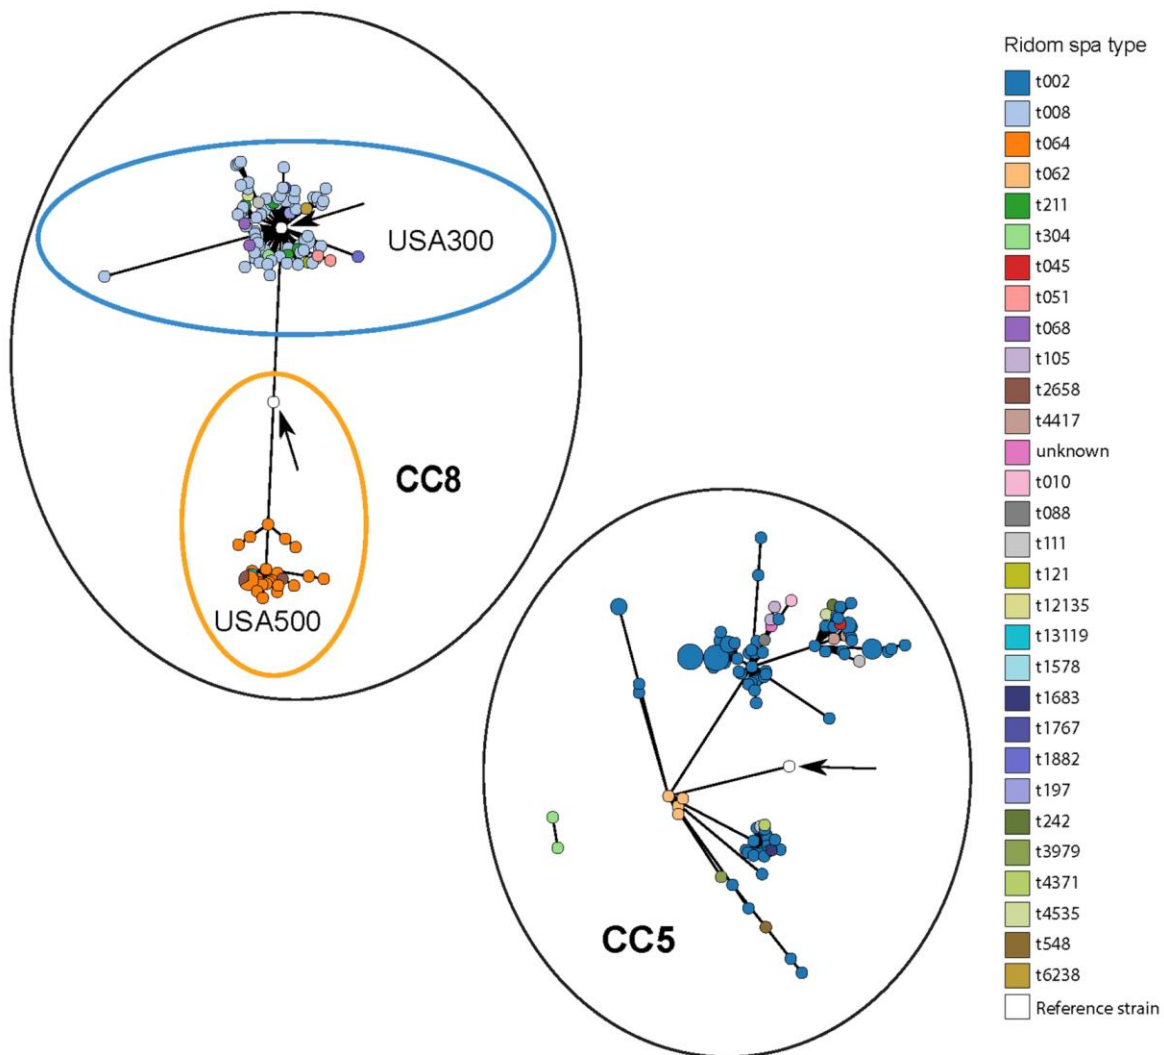

Clustering of isolates into CC5 and CC8, as well as USA300 and USA500 based on cgMLST data. Ridom *spa* types are listed on right. The arrows point to the published NCBI reference genomes for each grouping. “Unknown” refers to a *spa* type not listed in Ridom database.

**Supplementary Figure 2. Multivariate Analysis of Death Related to MRSA BSI within 90 Days from Different Sources.**

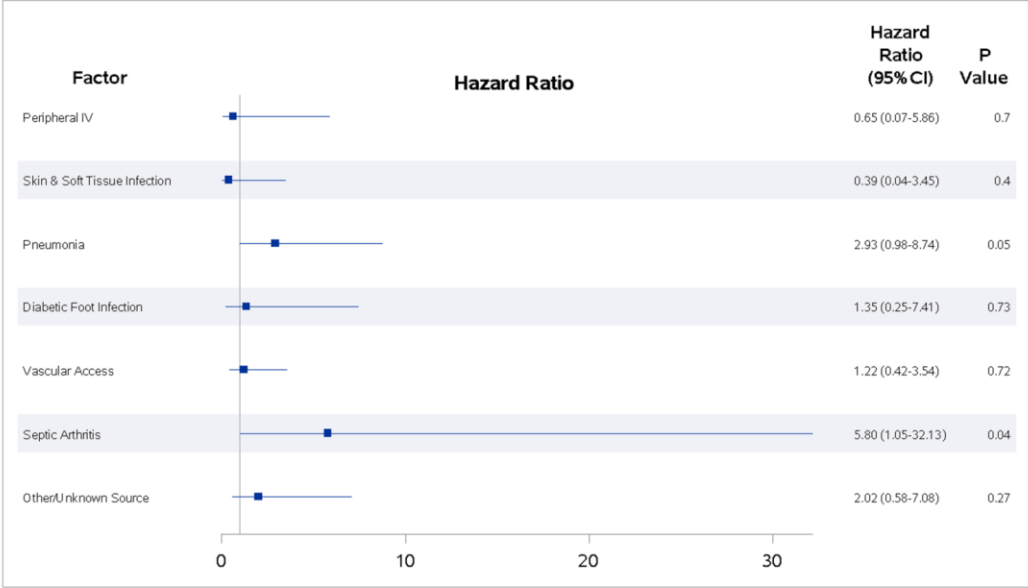

Forest plot of a multivariate Cox regression for all documented sources of MRSA BSI. The square represents the hazard ratio (HR), and the lines reflect the 95% confidence interval.
